# Supplementary material for: New 1,3,4-thiadiazoles as potential anticancer agents: pro-apoptotic, cell cycle arrest, molecular modelling, and ADMET profile
Source: Royal Society of Chemistry journal article supplement (doi:10.1039/d3ra02716c), 2023-01-01

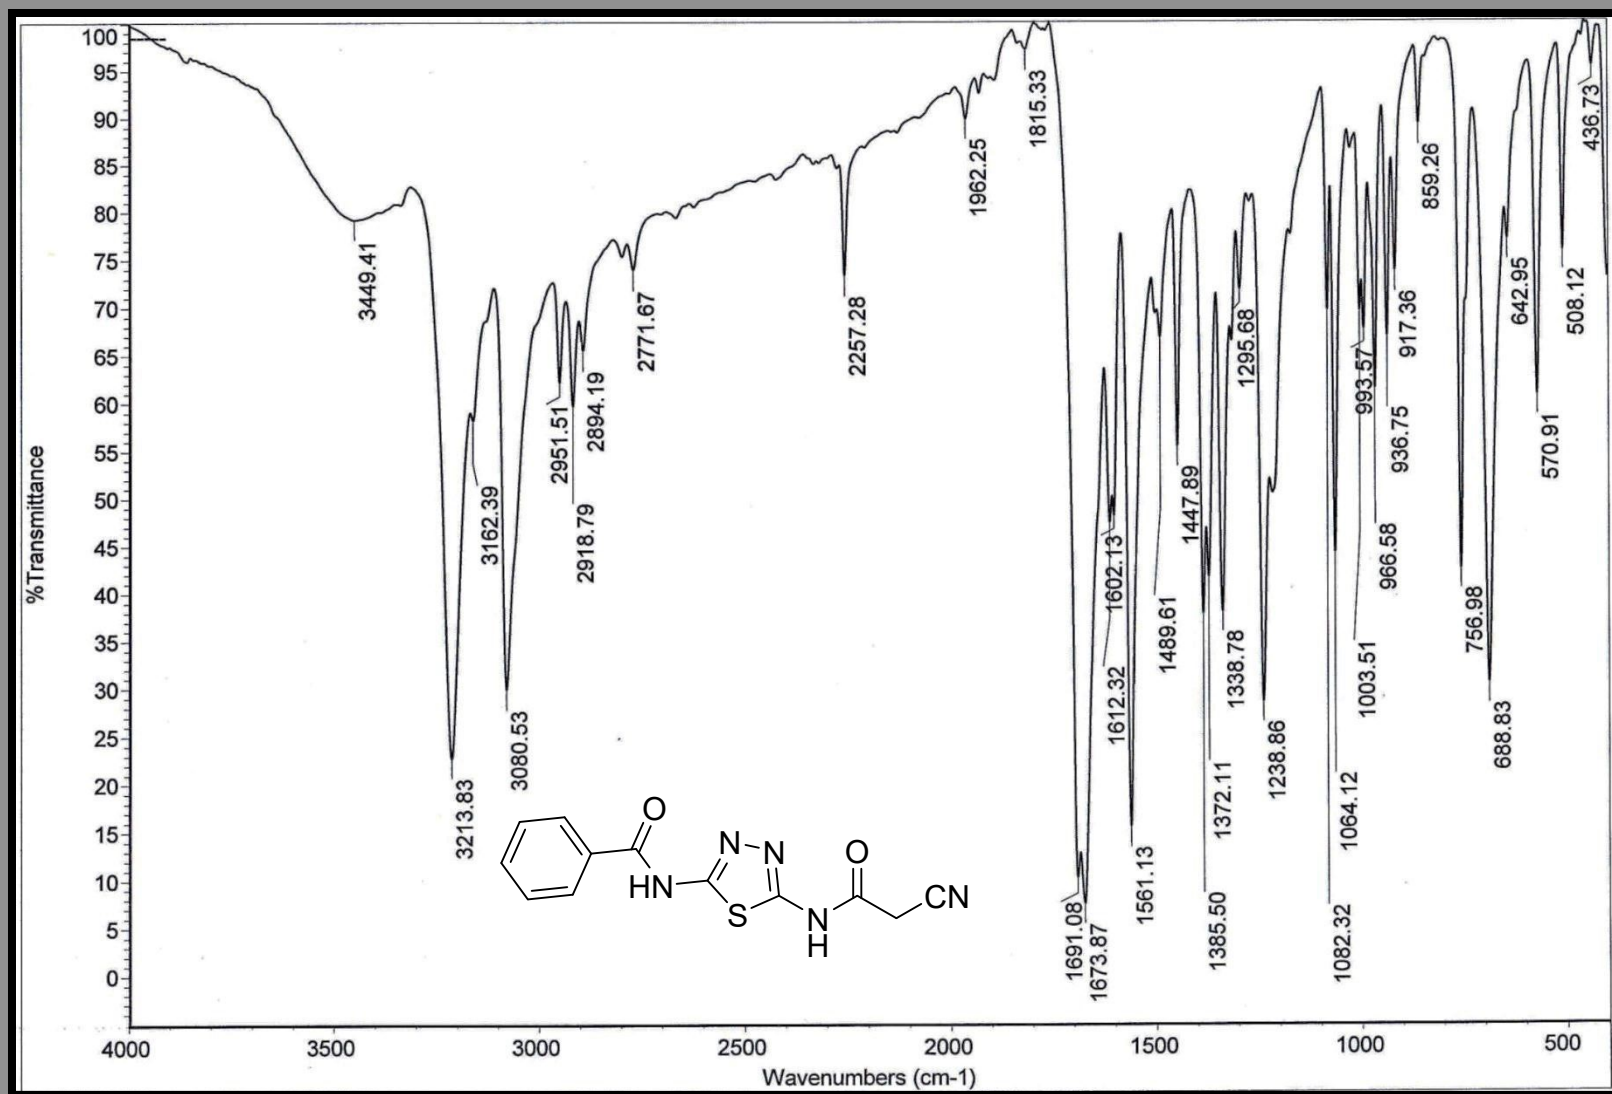

IR spectrum of compound 3

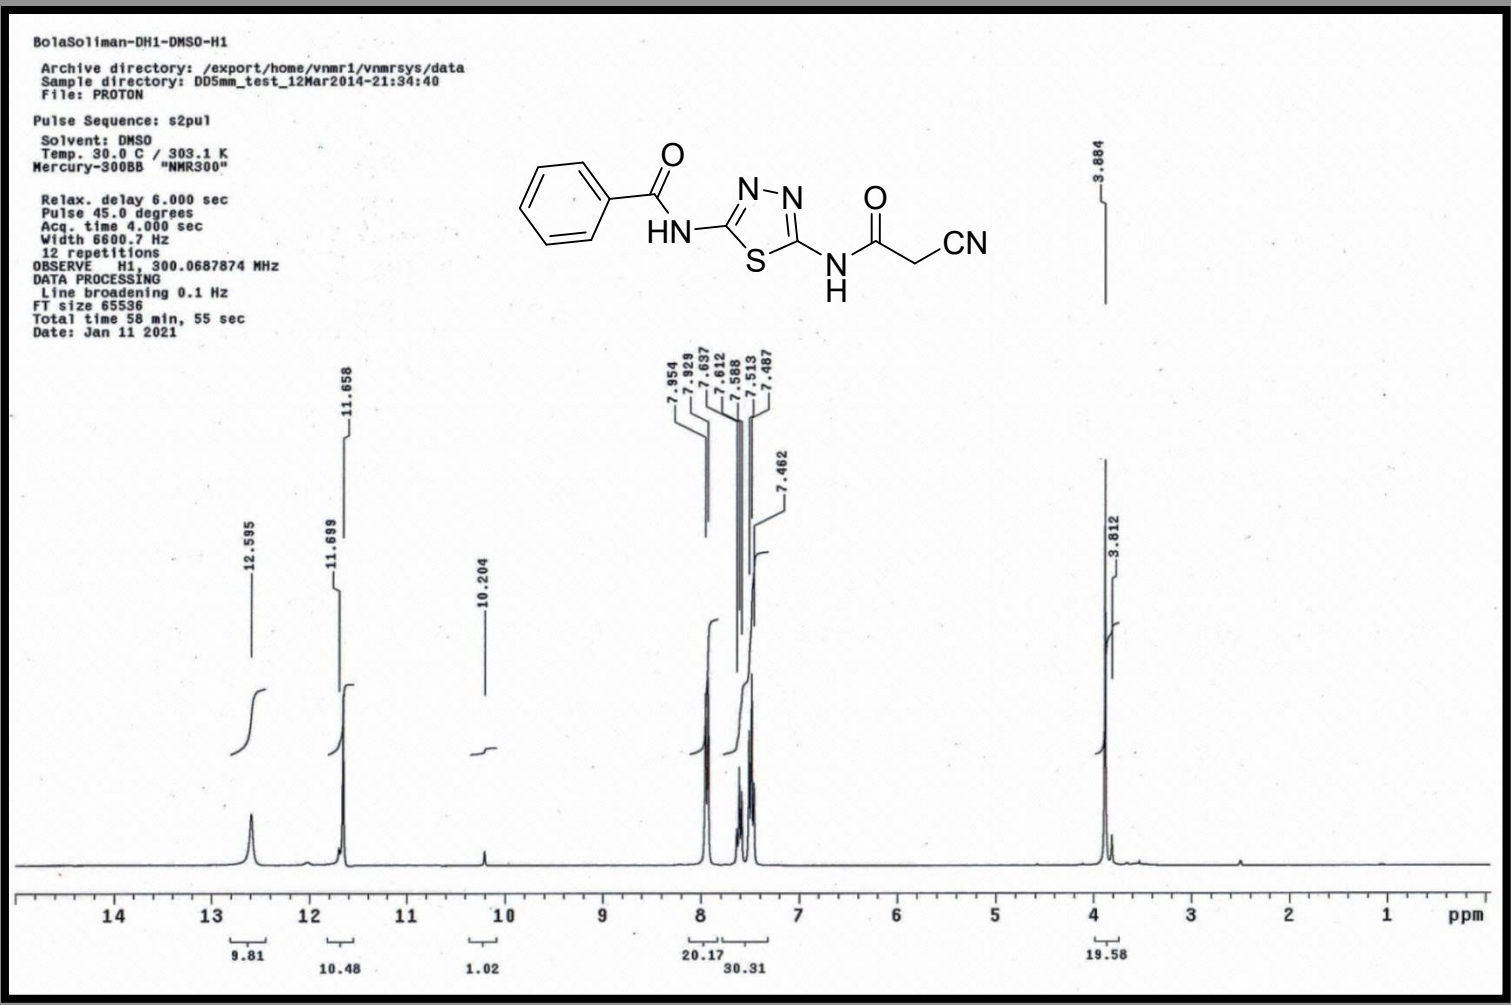

<sup>1</sup>H-NMR spectrum (DMSO-d<sub>6</sub>) of compound 3

Bo1aSoliman-DH1-DMSO-D20-H1

Archive directory: /export/home/vnmr1/vnmrsys/data  
Sample directory: DD5mm\_test\_12Mar2014-21:34:40  
File: PROTON

Pulse Sequence: s2pu1

Solvent: DMSO  
Temp. 30.0 C / 303.1 K  
Mercury-300BB "NMR300"

Relax. delay 6.000 sec  
Pulse 45.0 degrees  
Acq. time 4.000 sec  
Width 6600.7 Hz  
18 repetitions  
OBSERVE H1, 300.0687874 MHz  
DATA PROCESSING  
Line broadening 0.1 Hz  
FT size 65536  
Total time 58 min, 55 sec  
Date: Jan 11 2021

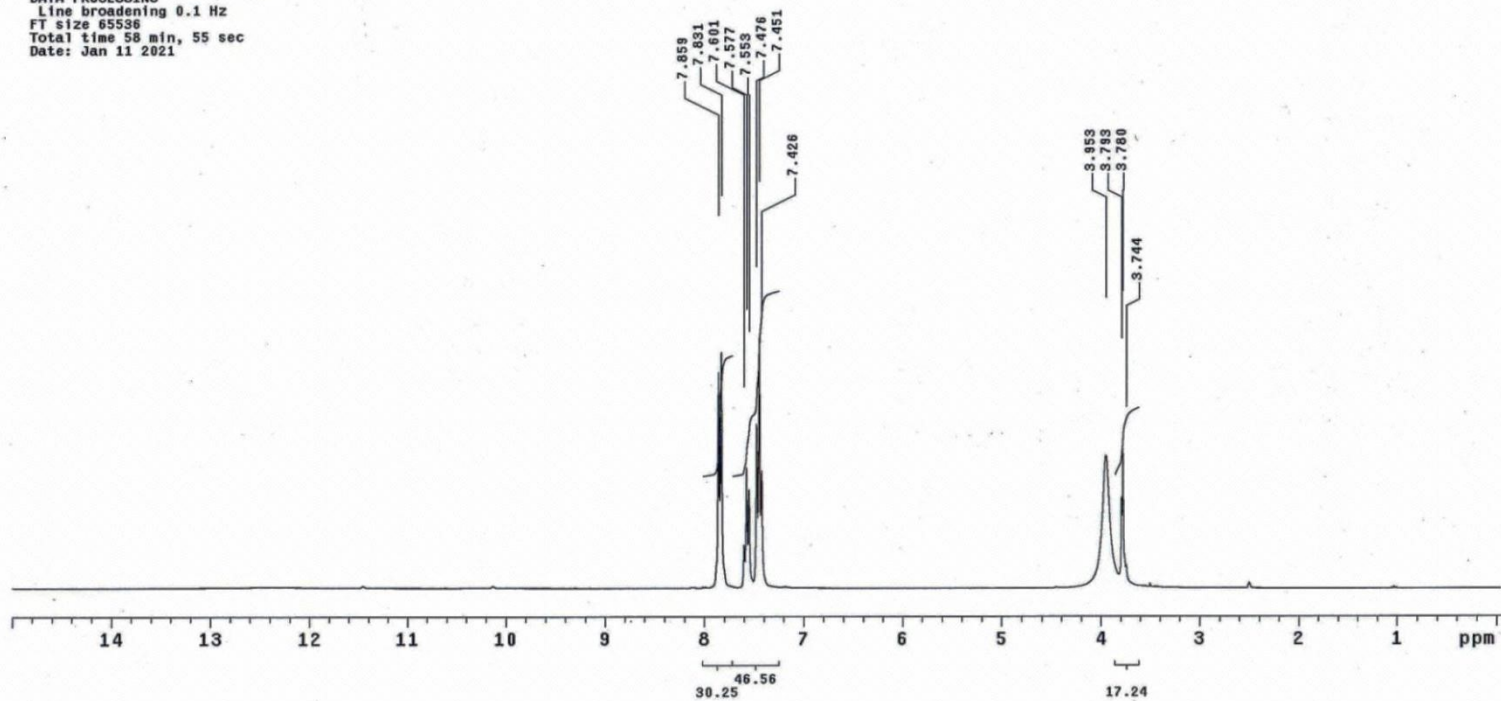

<sup>1</sup>H-NMR spectrum (DMSO-d<sub>6</sub>+ D<sub>2</sub>O) of compound 3

BolaSoliman-DH1-DMSO-C13

Archive directory: /export/home/vnmr1/vnmrsys/data  
Sample directory: DD5mm\_test\_12Mar2014-21:34:40  
File: PROTON

Pulse Sequence: s2pu1

Solvent: DMSO  
Ambient temperature  
Mercury-300BB "NMR300"

Pulse 45.0 degrees  
Acq. time 1.707 sec  
Width 13781.7 Hz  
680 repetitions  
OBSERVE C13, 75.4523805 MHz  
DECOUPLE H1, 300.0702830 MHz  
Power 34 dB  
continuously on  
WALTZ-16 modulated  
DATA PROCESSING  
Line broadening 1.0 Hz  
FT size 65536  
Total time 31 hr, 7 min, 12 sec  
Date: Jan 11 2021

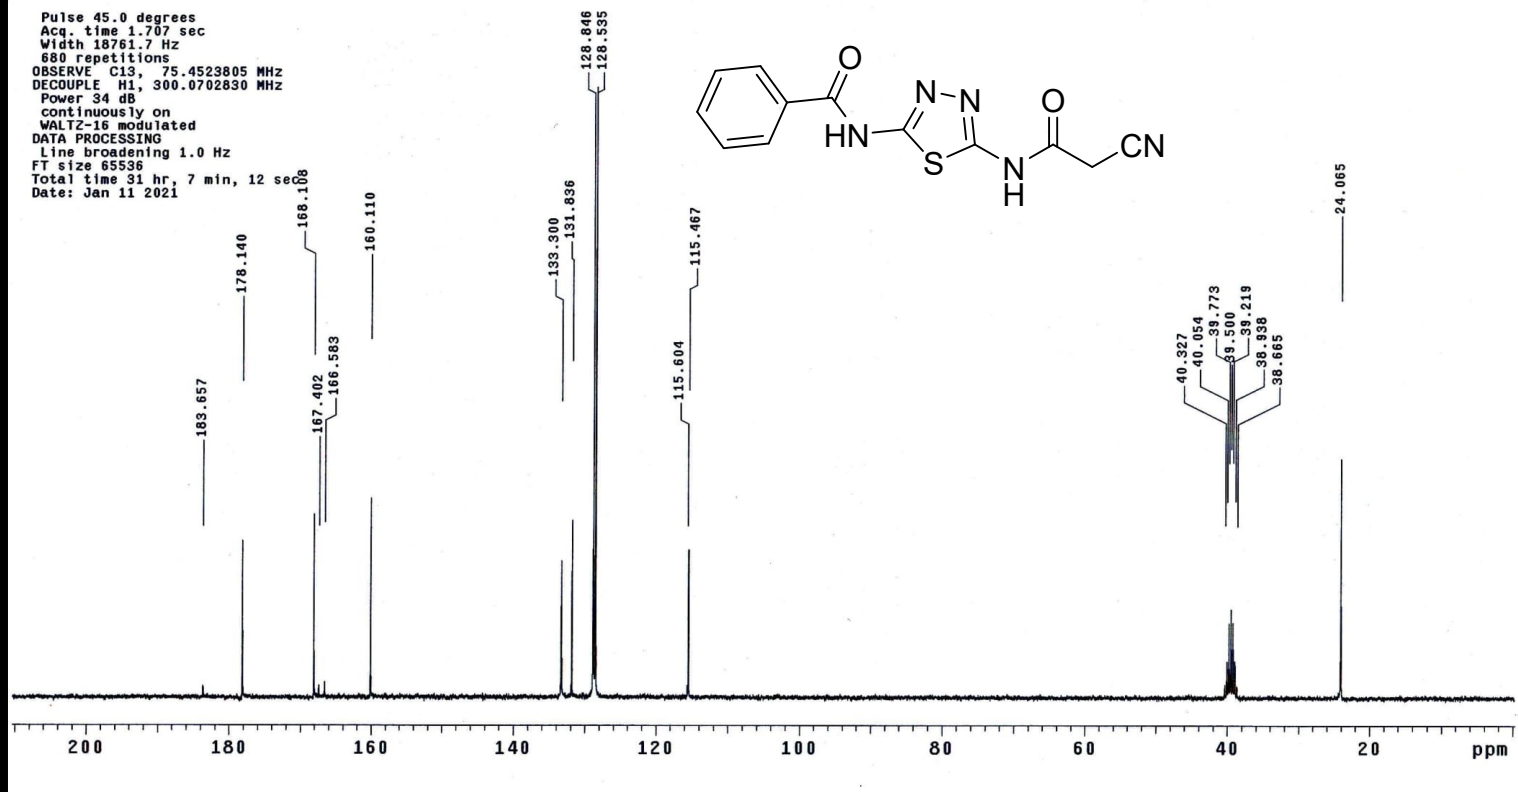

$^{13}\text{C}$ -NMR spectrum (DMSO- $d_6$ ) of compound 3

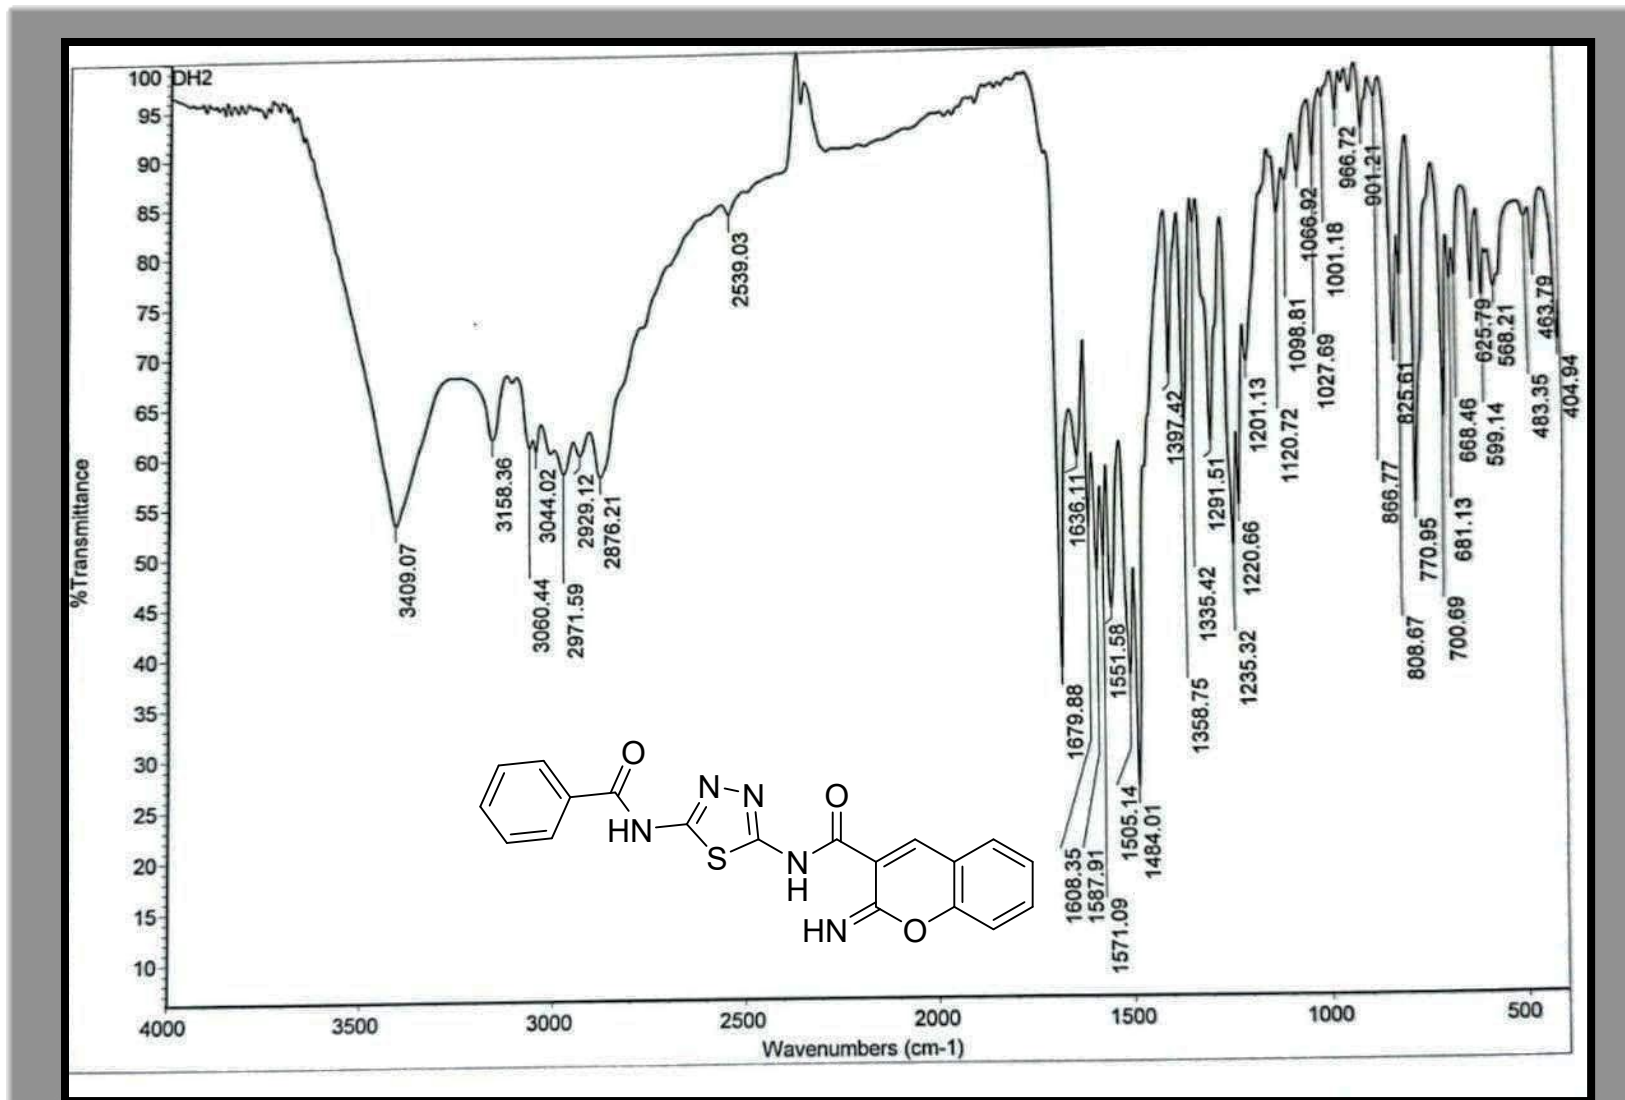

IR spectrum of compound 4

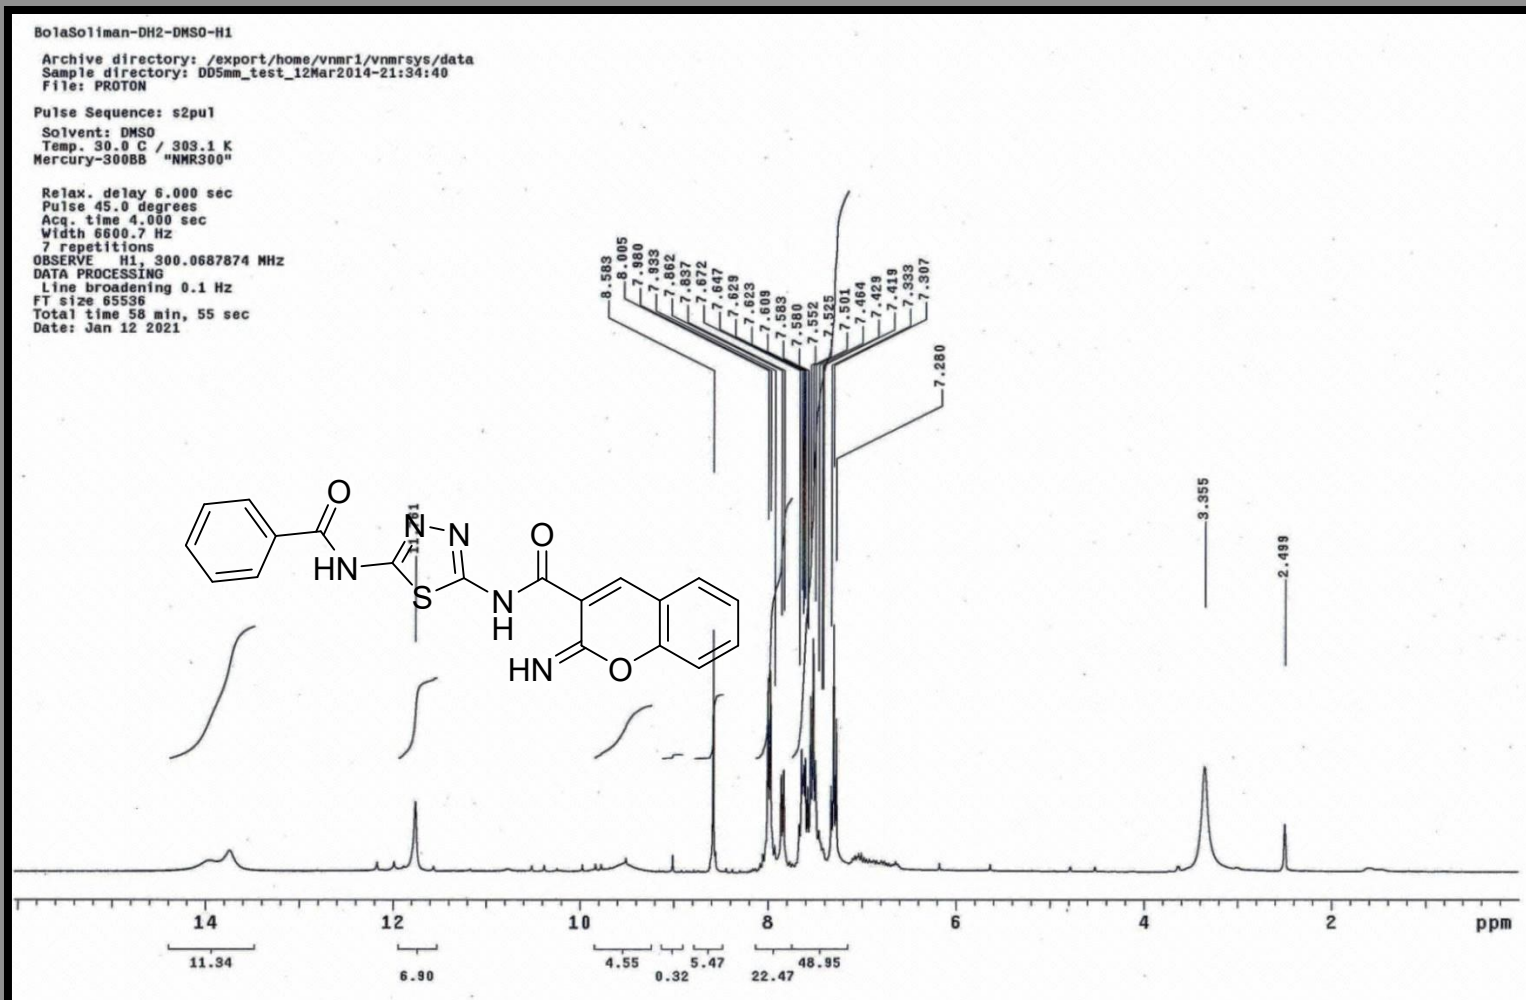

<sup>1</sup>H-NMR spectrum (DMSO-d<sub>6</sub>) of compound 4

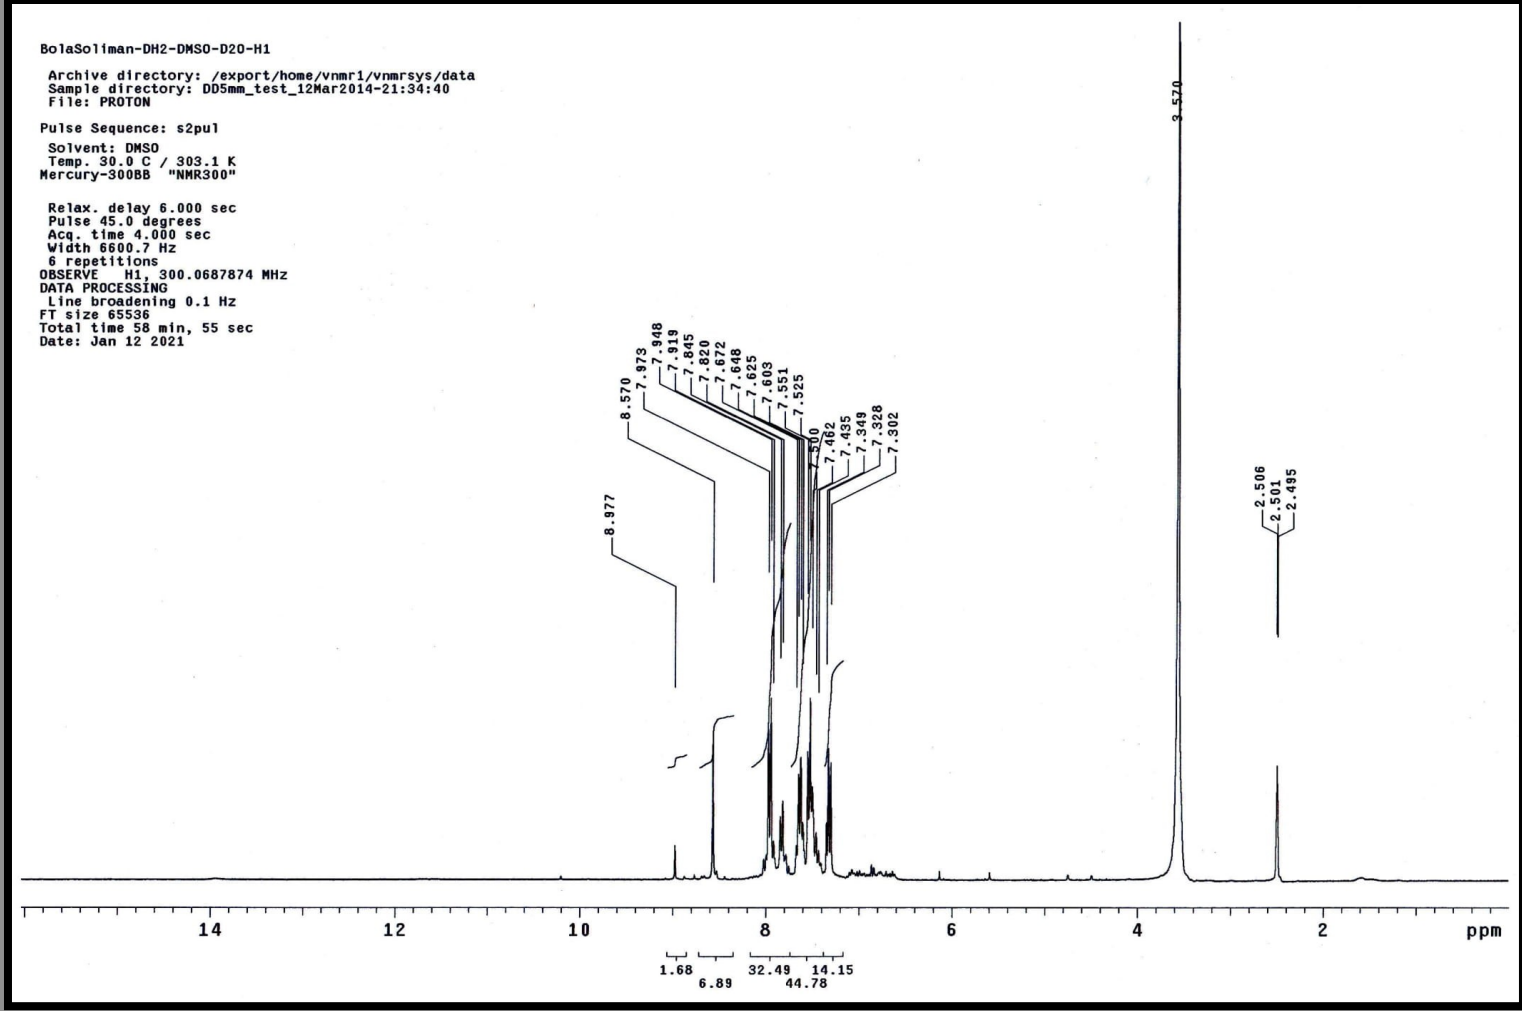

<sup>1</sup>H-NMR spectrum (DMSO-d<sub>6</sub>+ D<sub>2</sub>O) of compound 4

BolaSoliman-DH2-DMSO-C13

Archive directory: /export/home/vnmr1/vnmrsys/data  
Sample directory: DD5mm\_test\_12Mar2014-21:34:40  
File: PROTON

Pulse Sequence: s2pu1

Solvent: DMSO  
Ambient temperature  
Mercury-300BB "NMR300"

Pulse 45.0 degrees  
Acq. time 1.707 sec  
Width 18761.7 Hz  
1968 repetitions  
OBSERVE C13, 75.4523805 MHz  
DECOUPLE H1, 300.0702830 MHz  
Power 34 dB  
continuously on  
WALTZ-16 modulated  
DATA PROCESSING  
Line broadening 1.0 Hz  
FT size 65536  
Total time 31 hr, 7 min, 12 sec  
Date: Jan 12 2021

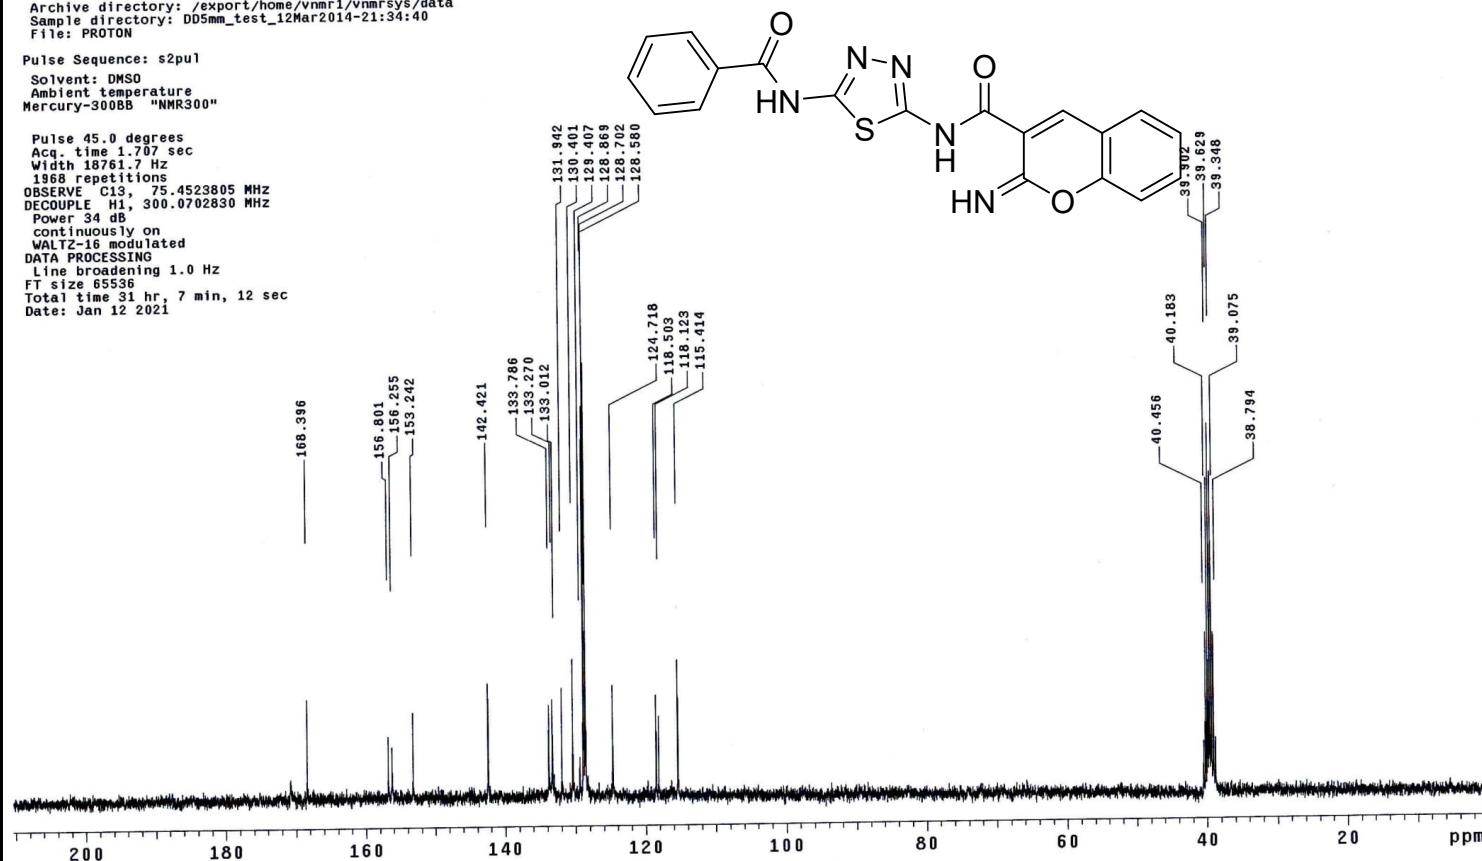

$^{13}\text{C}$ -NMR spectrum (DMSO- $d_6$ ) of compound 4



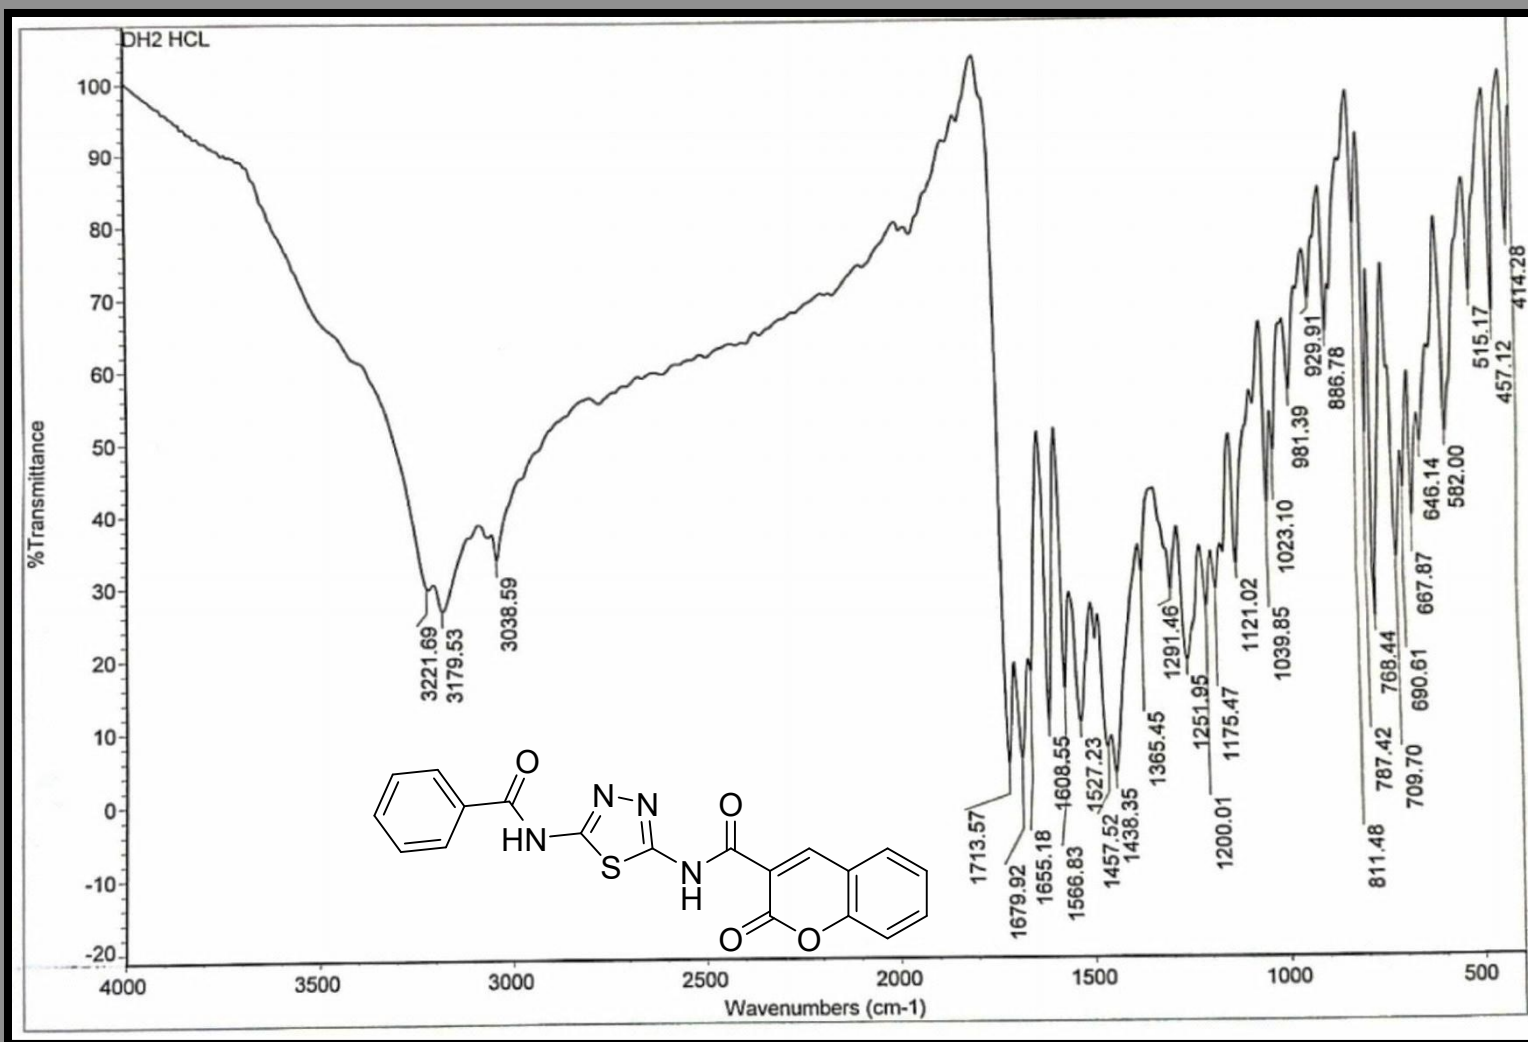

IR spectrum of compound 5

Poula Soliman\_H\_DH2HCI

Microanalytical Unit - FOPCU - NMR laboratory  
www.pharma.cu.edu.eg dir-mau.fopcu@pharma.cu.edu.eg

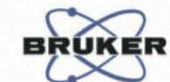

13.7501  
13.7360

12.2002

9.0445  
8.0859  
8.0670  
8.0215  
8.0026  
7.8060  
7.7866  
7.6751  
7.6570  
7.5769  
7.5699  
7.5516  
7.5316  
7.5045  
7.4855

3.4558  
3.4388  
3.4221  
2.5092

Current Data Parameters  
NAME Poula Soliman\_H\_DH2HCI  
EXPNO 10  
PROCNO 1  
F2 - Acquisition Parameters  
Date\_ 20210628  
Time 8.55  
INSTRUM spect  
PROBHD 5 mm PABBO BB/  
PULPROG zg30  
TD 65536  
SOLVENT DMSO  
NS 32  
DS 2  
SWH 8012.820 Hz  
FIDRES 0.122266 Hz  
AQ 4.0894465 sec  
RG 146.06  
DW 62.400 usec  
DE 6.50 usec  
TE 298.1 K  
D1 1.0000000 sec  
TDO 1

===== CHANNEL f1 =====  
SFO1 400.1924713 MHz  
NUC1 1H  
P1 15.00 usec  
PLW1 10.39999962 W  
F2 - Processing parameters  
SI 65536  
SF 400.1900000 MHz  
WDW EM  
SSB 0  
LB 0.30 Hz  
GB 0  
PC 1.00

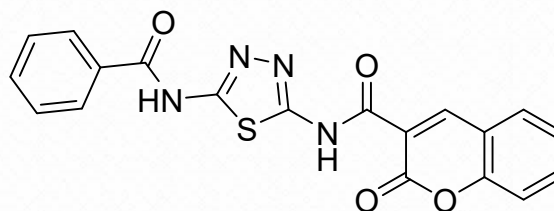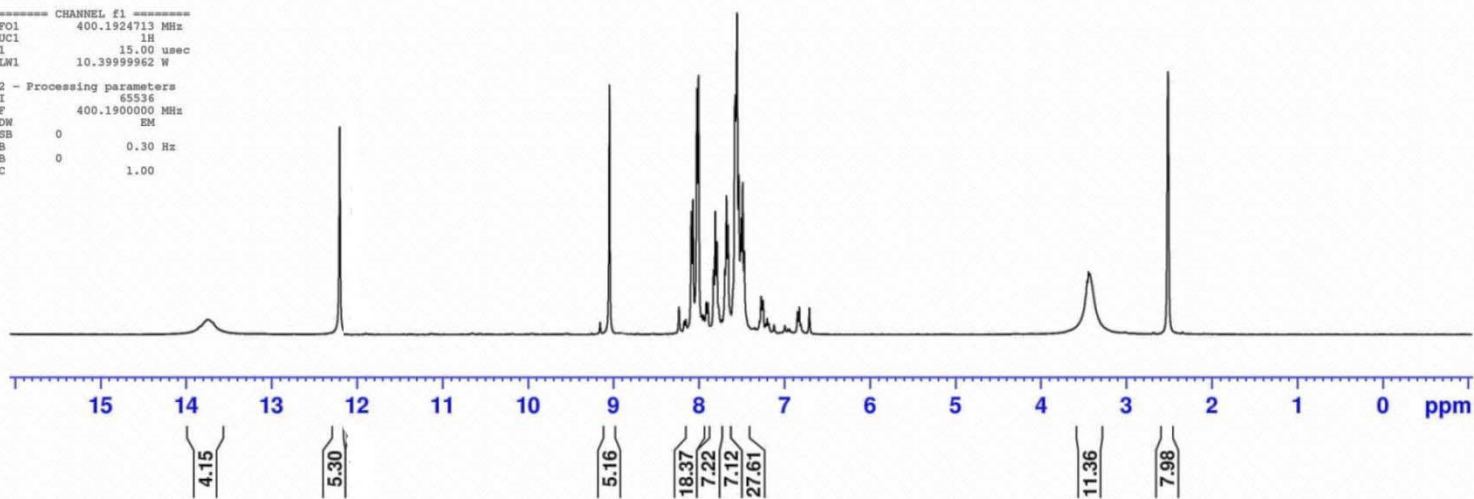

<sup>1</sup>H-NMR spectrum (DMSO-d<sub>6</sub>) of compound 5

Poula Soliman\_H\_DH2HCl\_D2O

Microanalytical Unit - FOPCU - NMR laboratory  
www.pharma.cu.edu.eg dir-mau.fopcu@pharma.cu.edu.eg

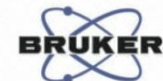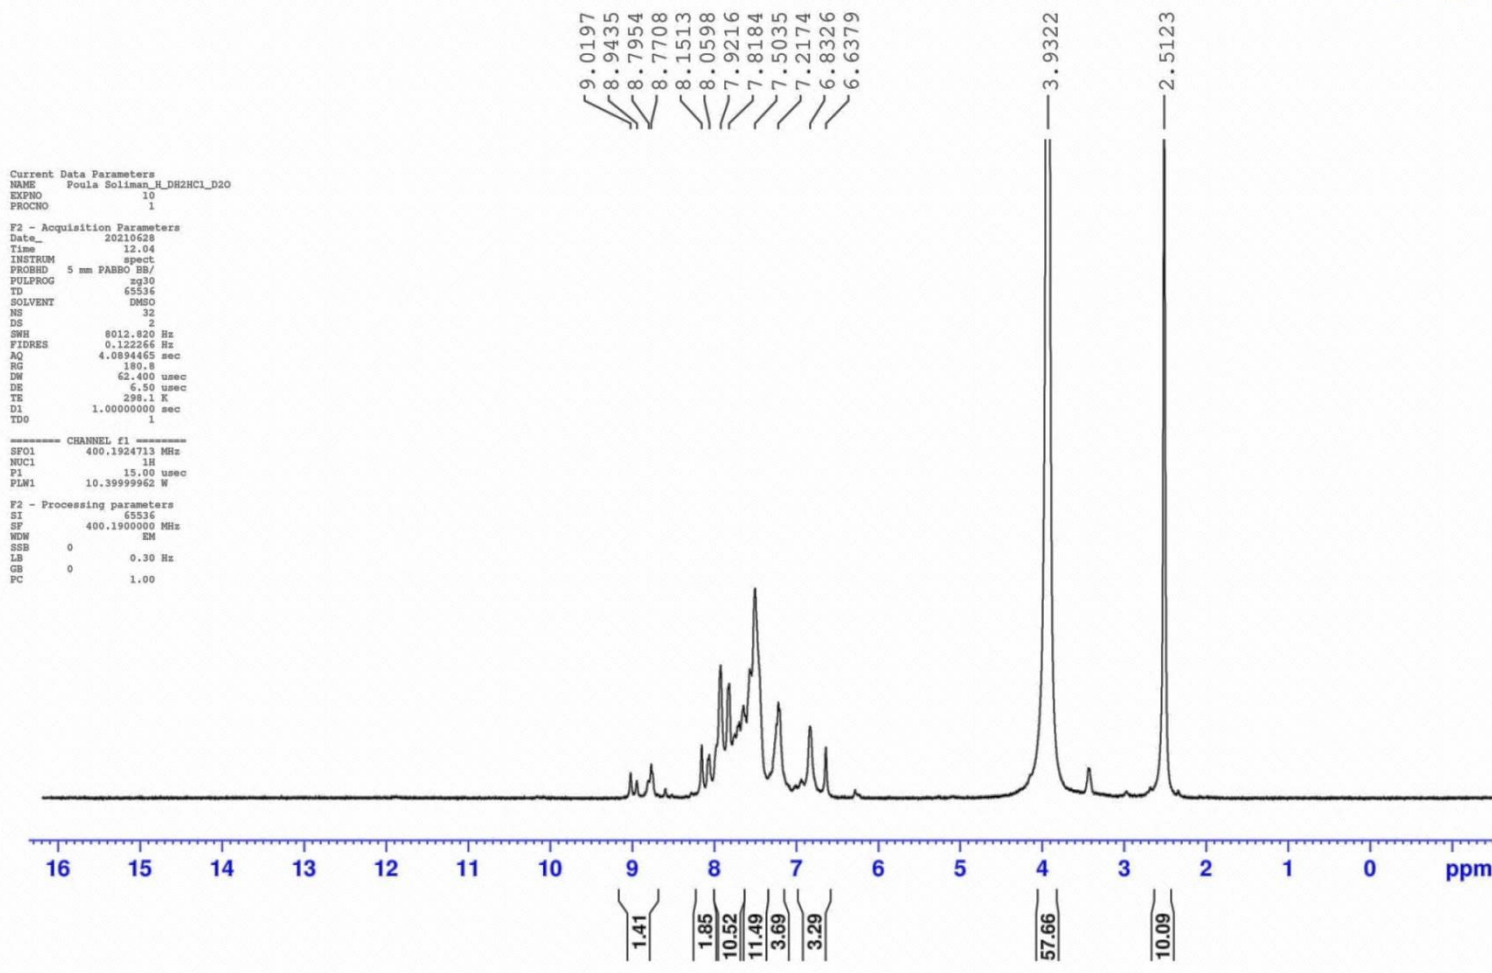

$^1\text{H-NMR}$  spectrum ( $\text{DMSO-d}_6 + \text{D}_2\text{O}$ ) of compound 5

Paula Soliman\_C\_DH2HC1

Microanalytical Unit - FOPCU - NMR laboratory  
www.pharma.cu.edu.eg dir-mau.fopcu@pharma.cu.edu.eg

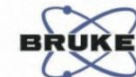

169.65  
166.99  
152.43  
140.30  
134.63  
131.67  
130.00  
128.58  
126.28  
123.76  
123.32  
120.23  
117.96  
116.56  
104.51  
40.61  
40.40  
40.19  
39.99  
39.78  
39.57  
39.36

Current Data Parameters  
NAME Paula Soliman\_C\_DH2HC1  
EXPNO 10  
PROCNO 1

F2 - Acquisition Parameters  
Date\_ 20210628  
Time 1.52  
INSTRUM spect  
PROBHD 5 mm PABBO BB/  
PULPROG zgpg30  
TD 65536  
SOLVENT DMSO  
NS 1500  
DS 4  
SWH 24038.461 Hz  
FIDRES 0.366798 Hz  
AQ 1.3631488 sec  
RG 202.37  
DW 20.800 usec  
DE 6.50 usec  
TE 298.0 K  
D1 2.00000000 sec  
D11 0.03000000 sec  
TD0 1

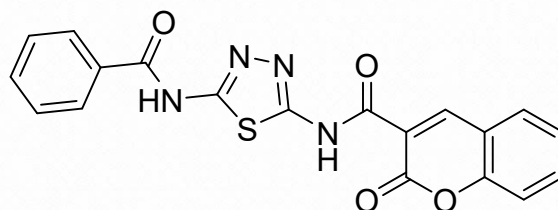

----- CHANNEL f1 -----  
SF01 100.6379178 MHz  
NUC1 13C  
P1 10.00 usec  
PLW1 45.00000000 W  
----- CHANNEL f2 -----  
SF02 400.1916008 MHz  
NUC2 1H  
CPDPRG[2] waltz16

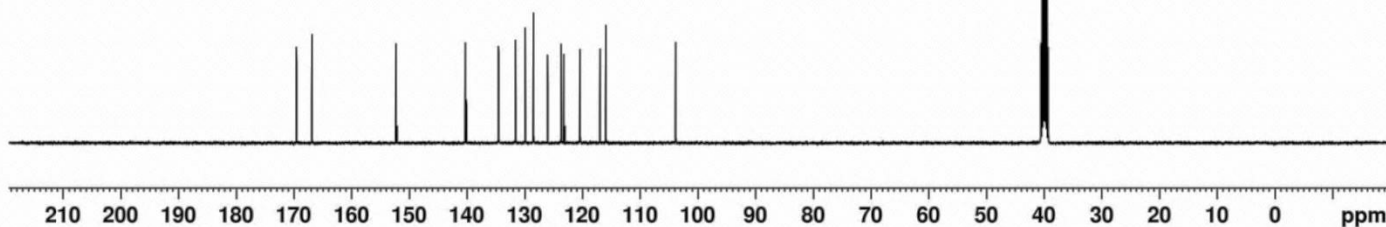

<sup>13</sup>C-NMR spectrum (DMSO-d<sub>6</sub>) of compound 5

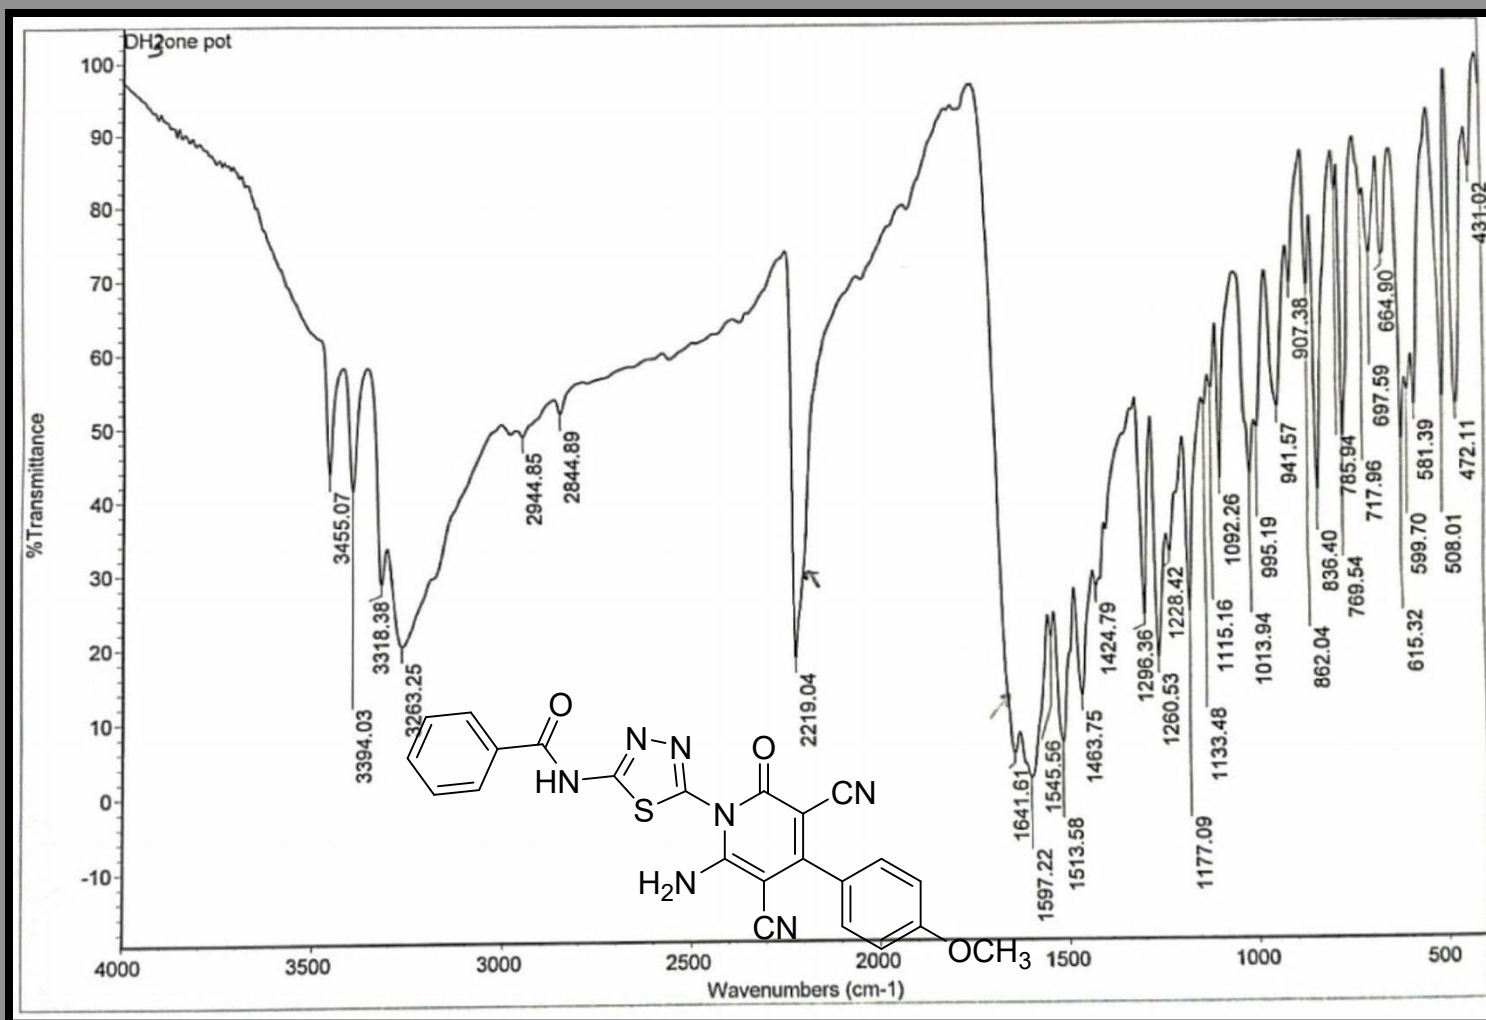

IR spectrum of compound 6a

Paula Soliman\_H\_DH3A

Microanalytical Unit - FOPCU - NMR laboratory  
www.pharma.cu.edu.eg dir-mau.fopcu@pharma.cu.edu.eg

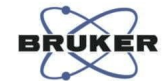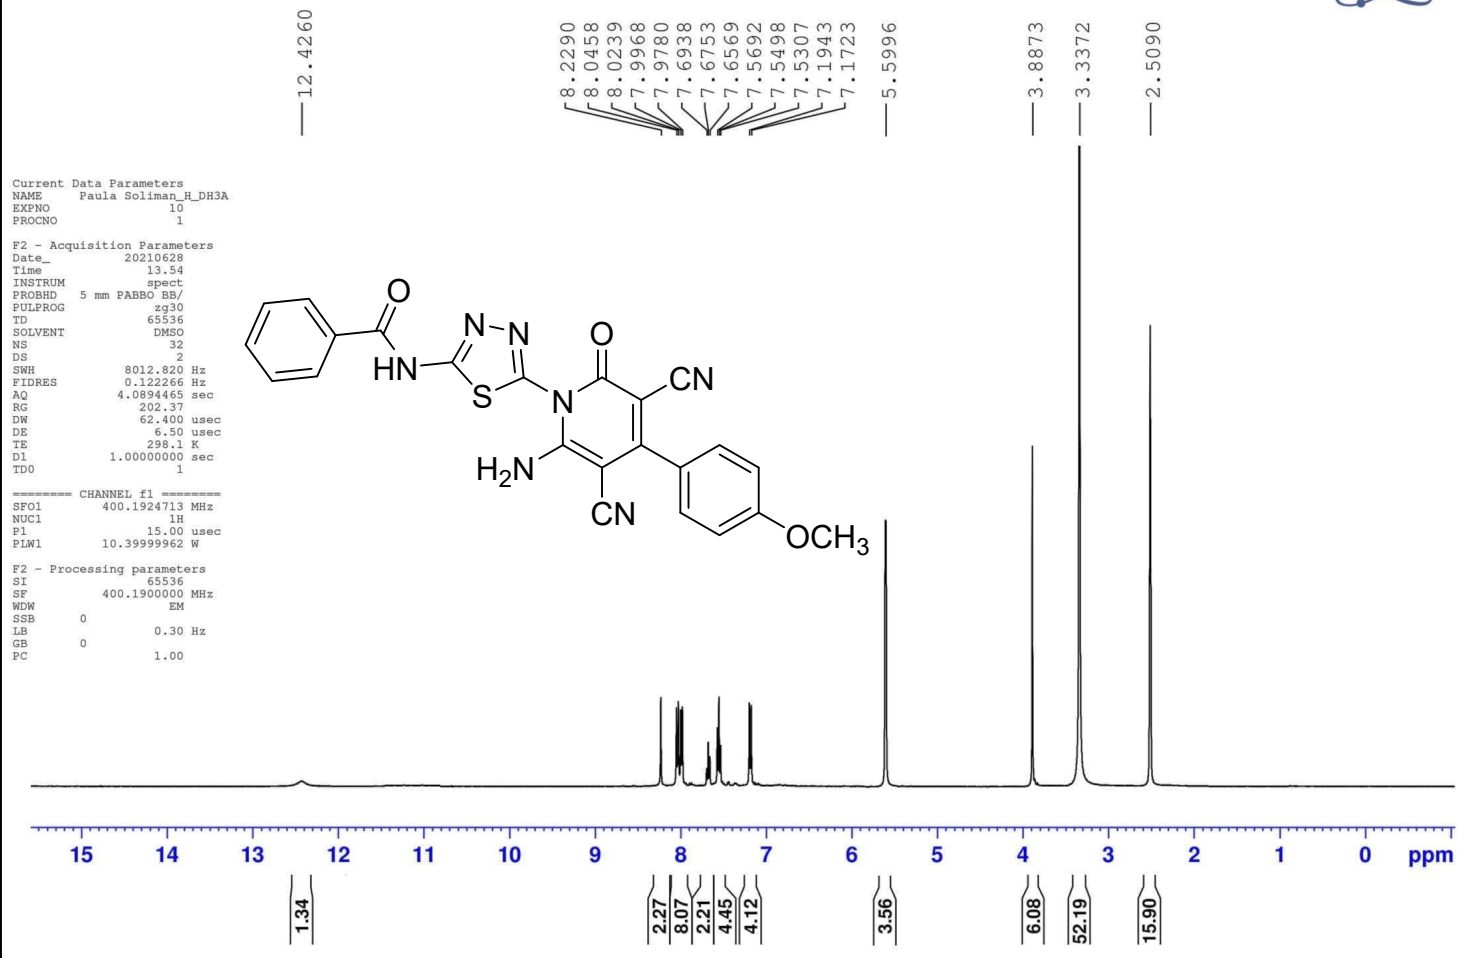

<sup>1</sup>H-NMR spectrum (DMSO-d<sub>6</sub>) of compound 6a

Paula Soliman\_H\_DH3A\_D2O

Microanalytical Unit - FOPCU - NMR laboratory  
www.pharma.cu.edu.eg dir-mau.fopcu@pharma.cu.edu.eg

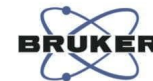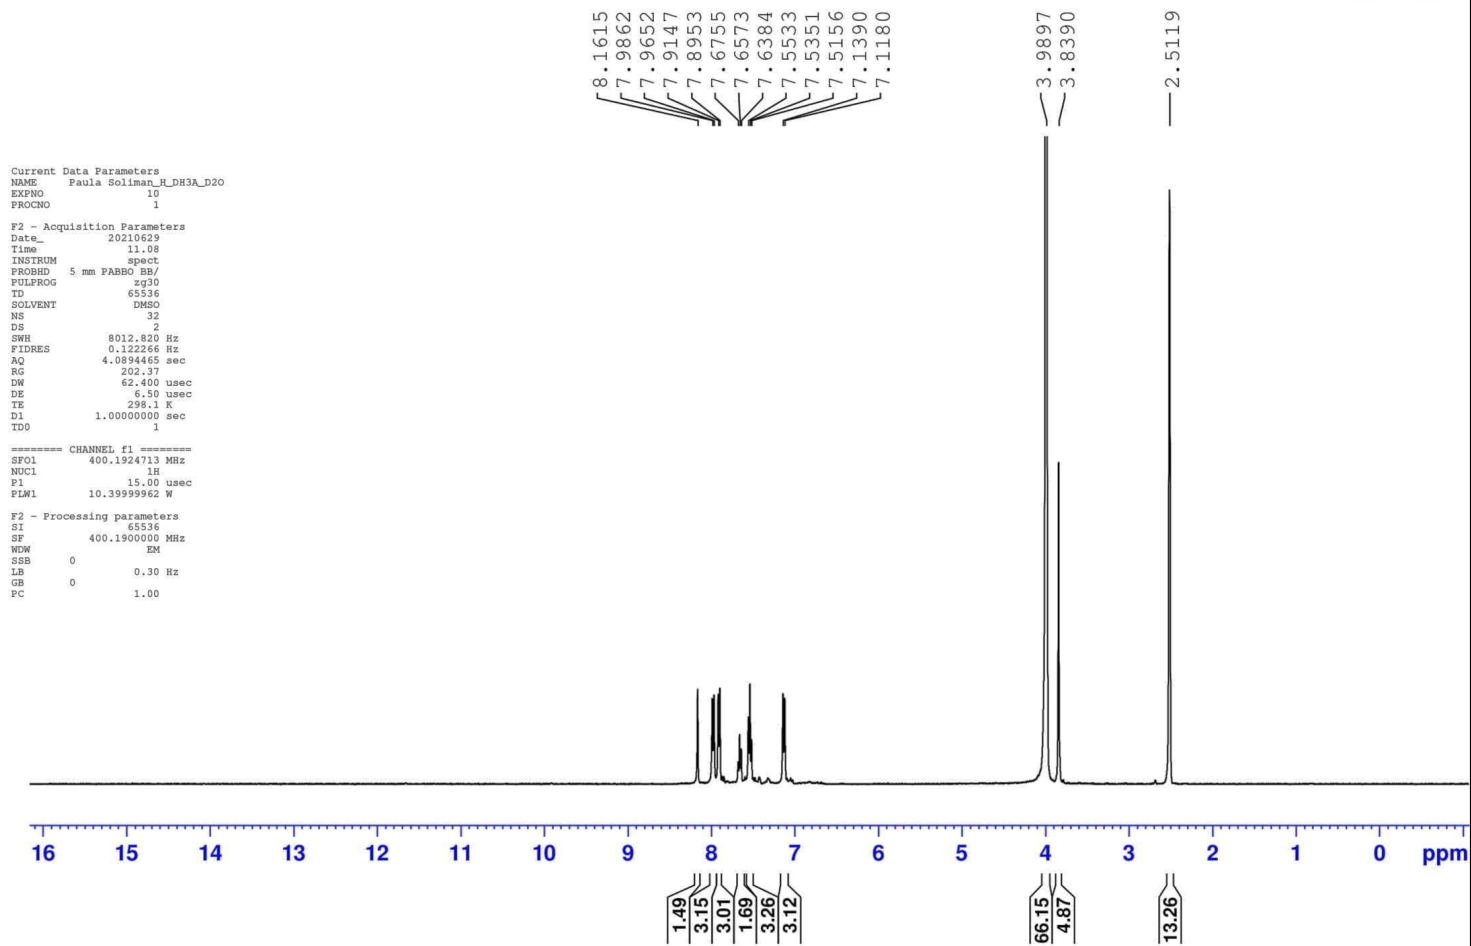

$^1\text{H-NMR}$  spectrum ( $\text{DMSO-d}_6 + \text{D}_2\text{O}$ ) of compound **6a**

Paula Soliman\_C\_DH3A

Microanalytical Unit - FOPCU - NMR laboratory  
www.pharma.cu.edu.eg dir-mau.fopcu@pharma.cu.edu.eg

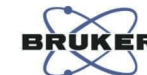

Current Data Parameters  
NAME Paula Soliman\_C\_DH3A  
EXPNO 10  
PROCNO 1

F2 - Acquisition Parameters  
Date\_ 20210629  
Time 9.56  
INSTRUM spect  
PROBHD 5 mm PABBO BB/  
PULPROG zgpg30  
TD 65536  
SOLVENT DMSO  
NS 1500  
DS 4  
SWH 24038.461 Hz  
FIDRES 0.366798 Hz  
AQ 1.3631488 sec  
RG 202.37  
DW 20.800 usec  
DE 6.50 usec  
TE 298.1 K  
D1 2.0000000 sec  
D11 0.03000000 sec  
TD0 1

===== CHANNEL f1 =====  
SFO1 100.6379178 MHz  
NUC1 13C  
P1 10.00 usec  
PLW1 45.00000000 W  
  
===== CHANNEL f2 =====  
SFO2 400.1916008 MHz  
NUC2 1H  
CPDPRG2 waltz16

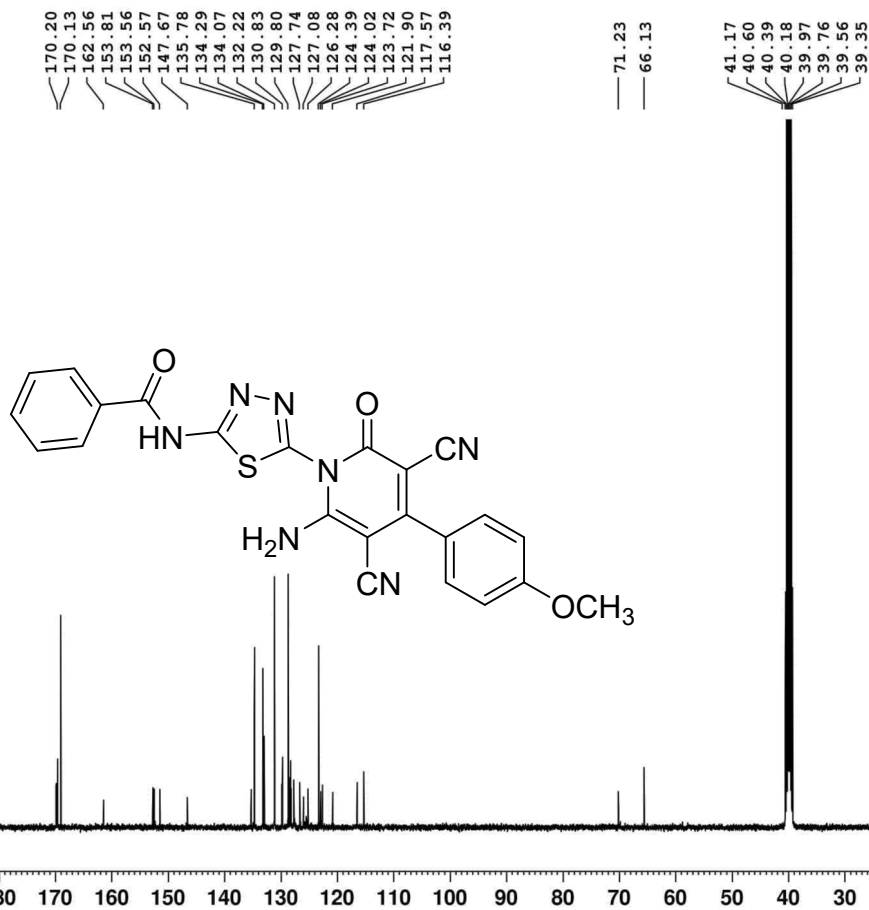

<sup>13</sup>C-NMR spectrum (DMSO-d<sub>6</sub>) of compound 6a



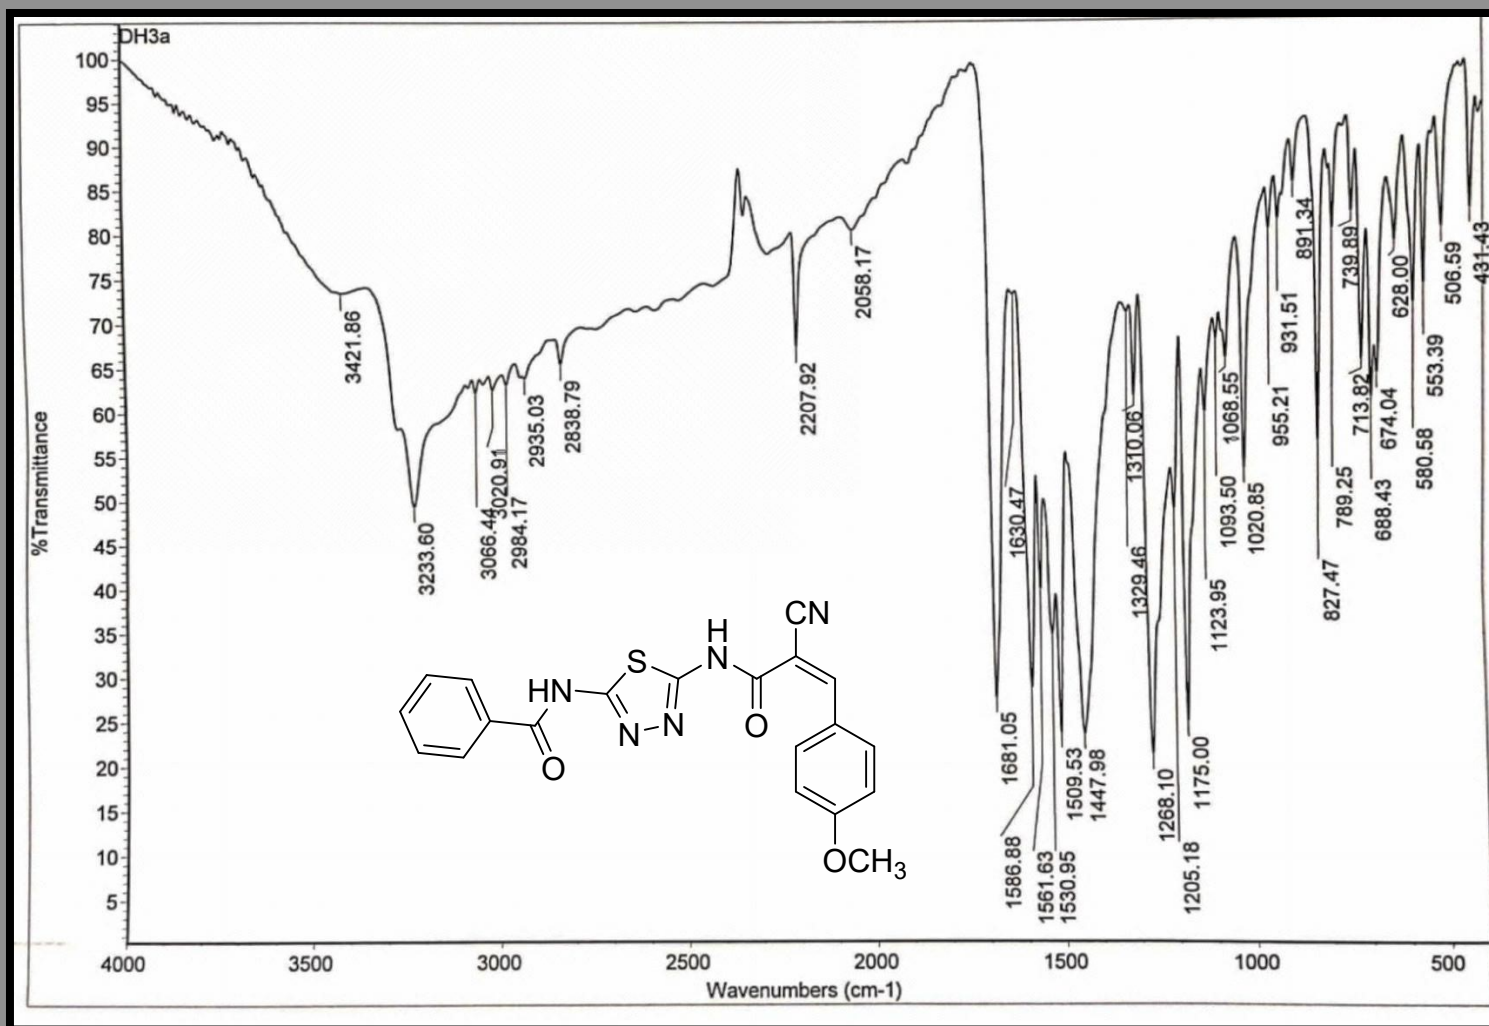

IR spectrum of compound **6b**

Paula Soliman\_H\_DH3

Microanalytical Unit - FOPCU - NMR laboratory  
www.pharma.cu.edu.eg dir-mau.fopcu@pharma.cu.edu.eg

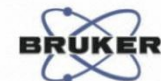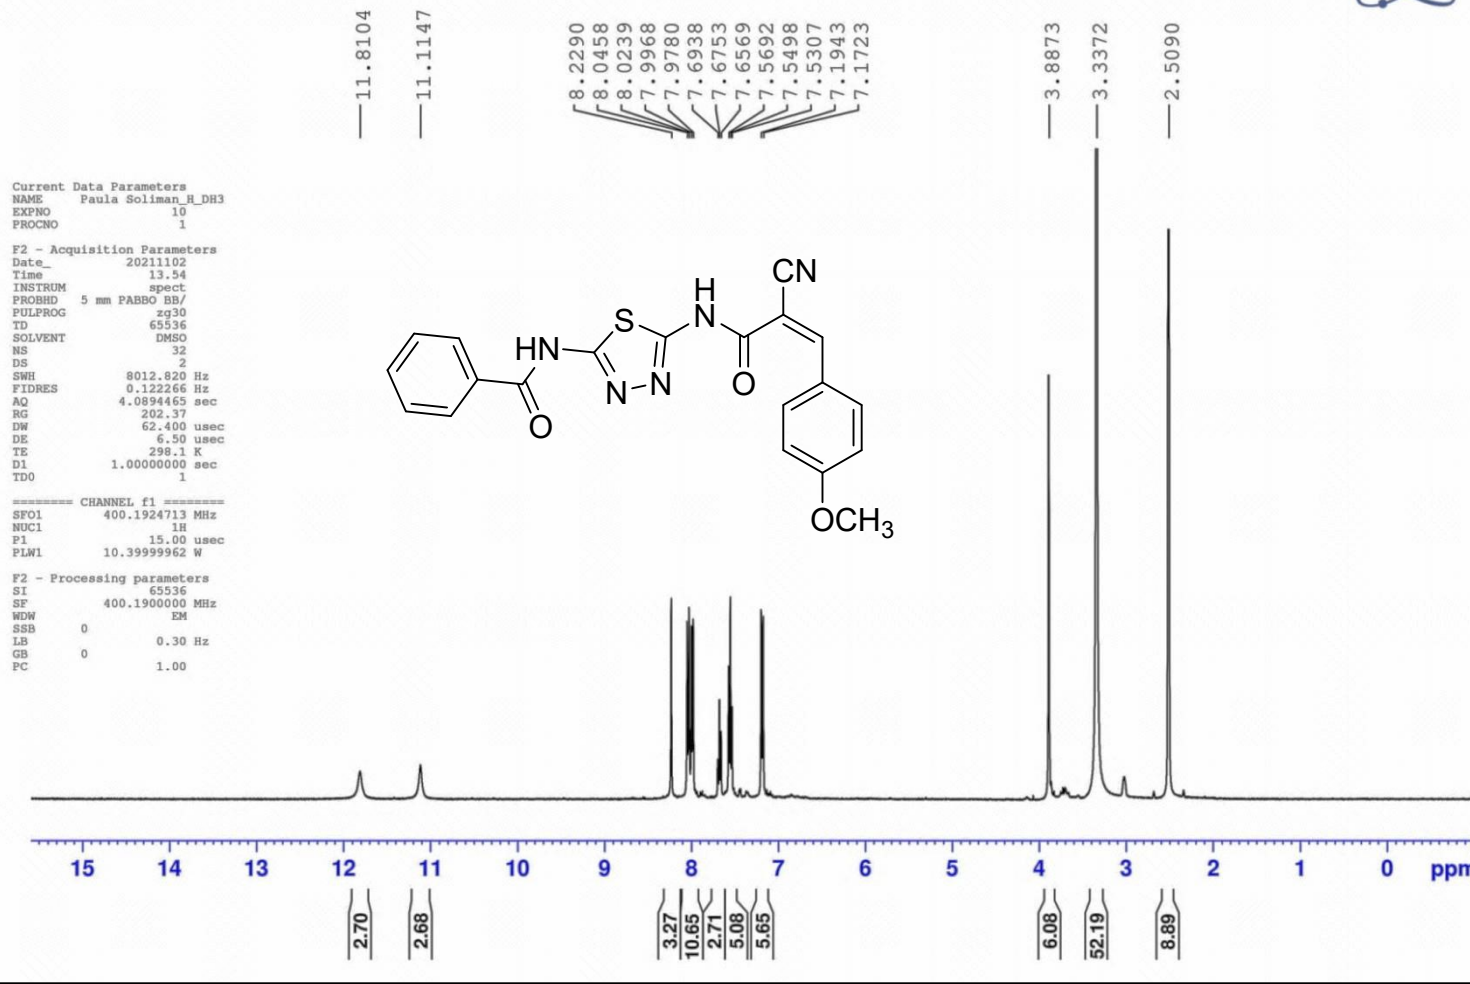

<sup>1</sup>H-NMR spectrum (DMSO-d<sub>6</sub>) of compound **6b**

Paula Soliman\_H\_DH3\_D2O

Microanalytical Unit - FOPCU - NMR laboratory  
www.pharma.cu.edu.eg dir-mau.fopcu@pharma.cu.edu.eg

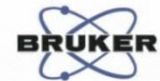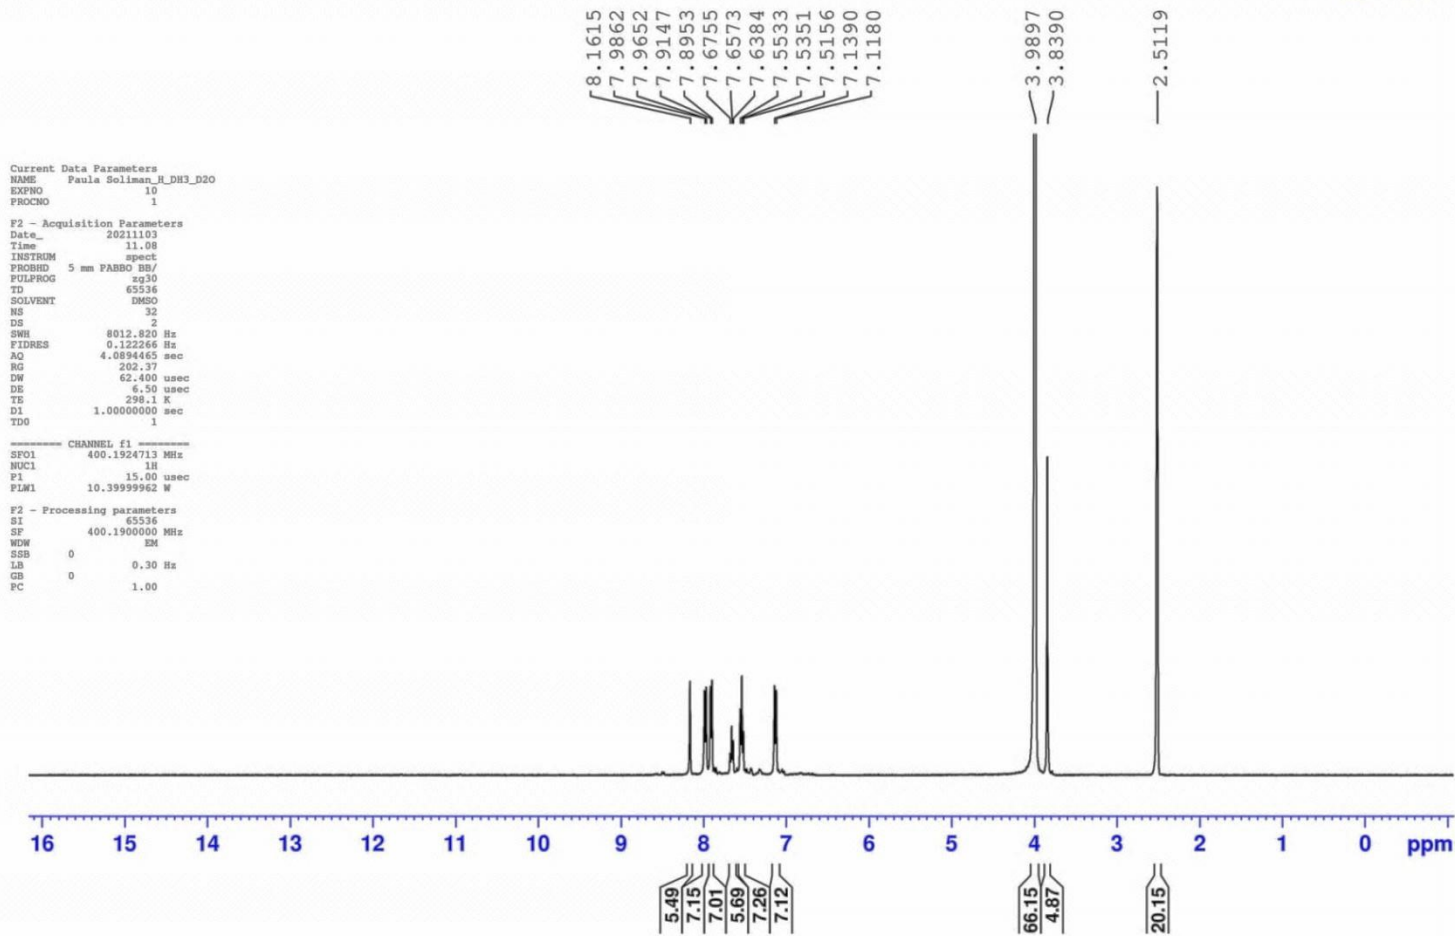

$^1\text{H-NMR}$  spectrum ( $\text{DMSO-d}_6 + \text{D}_2\text{O}$ ) of compound **6b**

Paula Soliman\_C\_DH3

Microanalytical Unit - FOPCU - NMR laboratory  
www.pharma.cu.edu.eg dir-mau.fopcu@pharma.cu.edu.eg

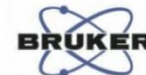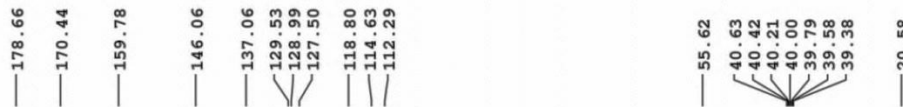

Current Data Parameters  
NAME Paula Soliman\_C\_DH3  
EXPNO 10  
PROCNO 1

F2 - Acquisition Parameters  
Date\_ 20211103  
Time 10.00  
INSTRUM spect  
PROBHD 5 mm PABBO BB/  
PULPROG zgpg30  
TD 65536  
SOLVENT DMSO  
NS 1500  
DS 4  
SWH 24038.461 Hz  
FIDRES 0.366798 Hz  
AQ 1.3631488 sec  
RG 202.37  
DW 20.800 usec  
DE 6.50 usec  
TE 298.0 K  
D1 2.0000000 sec  
D11 0.03000000 sec  
TD0 1

----- CHANNEL f1 -----  
SFO1 100.6379178 MHz  
NUC1 13C  
P1 10.00 usec  
PLW1 45.00000000 W

----- CHANNEL f2 -----  
SFO2 400.1916008 MHz  
NUC2 1H  
CPDPRG[2] waltz16

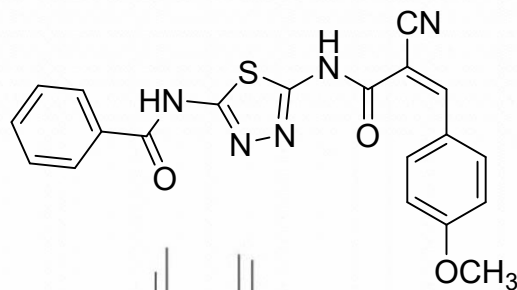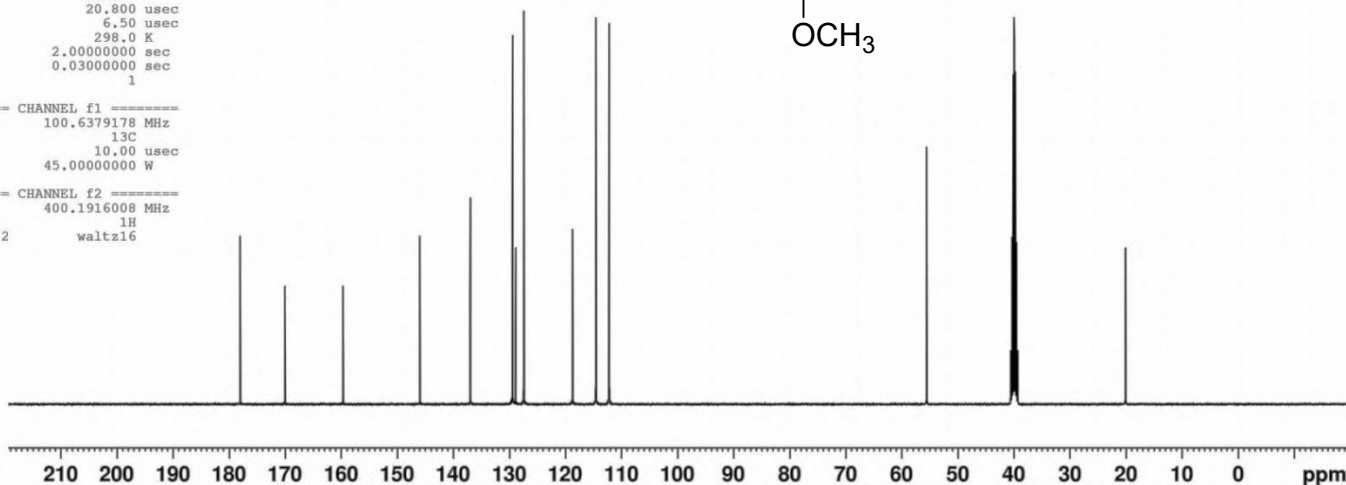

<sup>13</sup>C-NMR spectrum (DMSO-d<sub>6</sub>) of compound **6b**

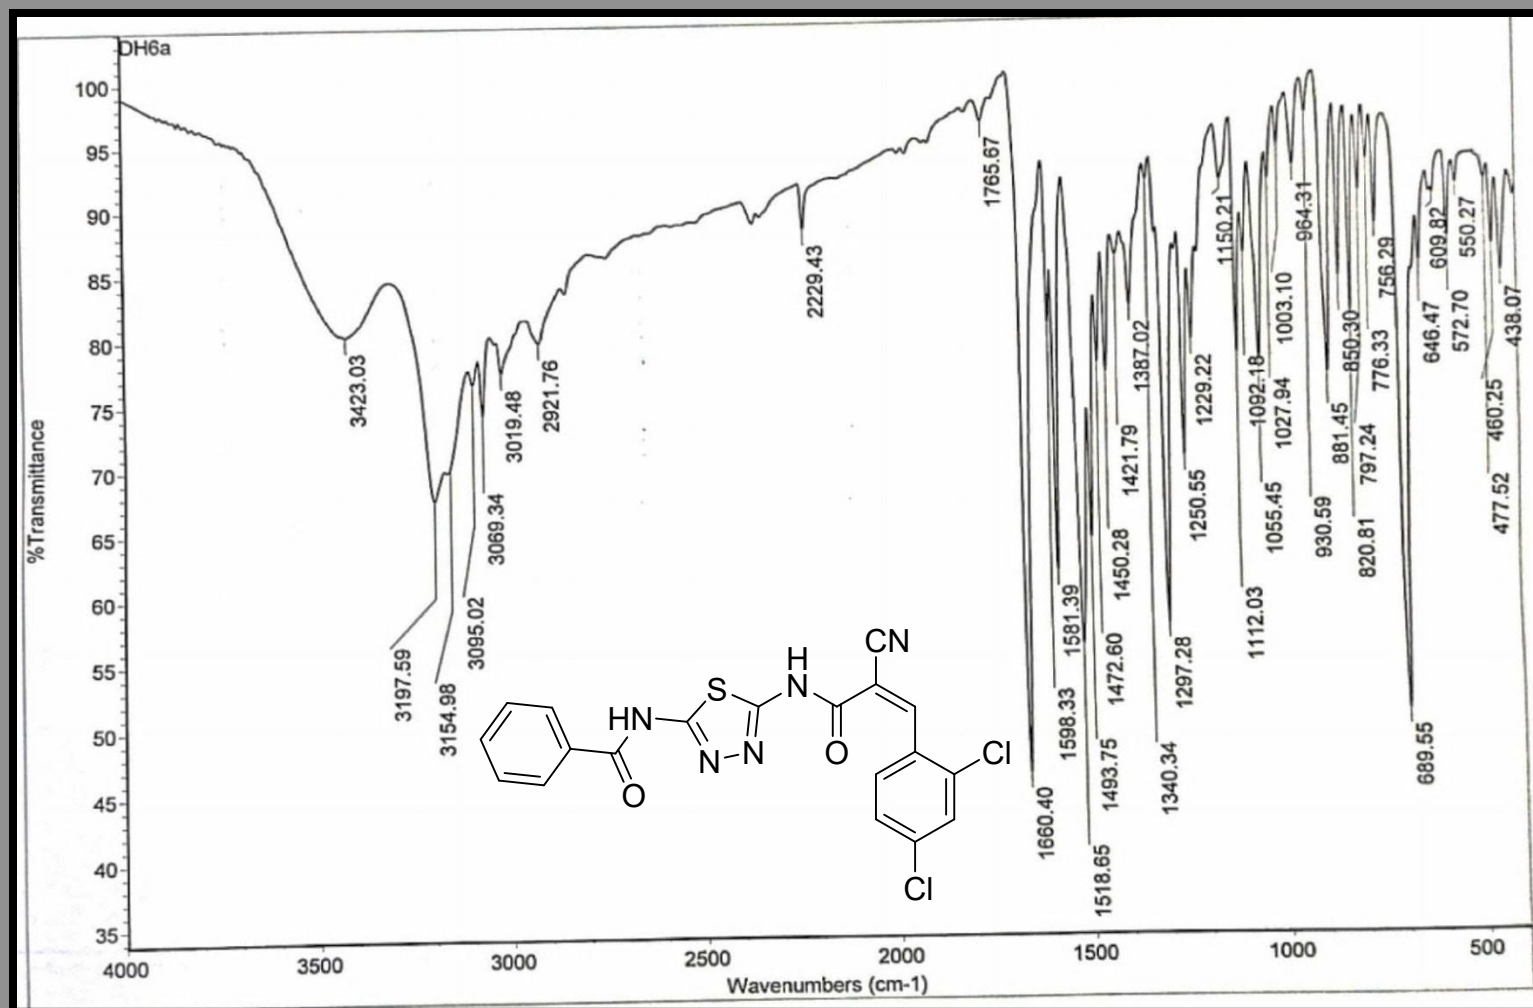

IR spectrum of compound 7a

Poula Soliman\_H\_DH6A

Microanalytical Unit - FOPCU - NMR laboratory  
www.pharma.cu.edu.eg dir-mau.fopcu@pharma.cu.edu.eg

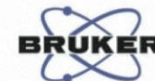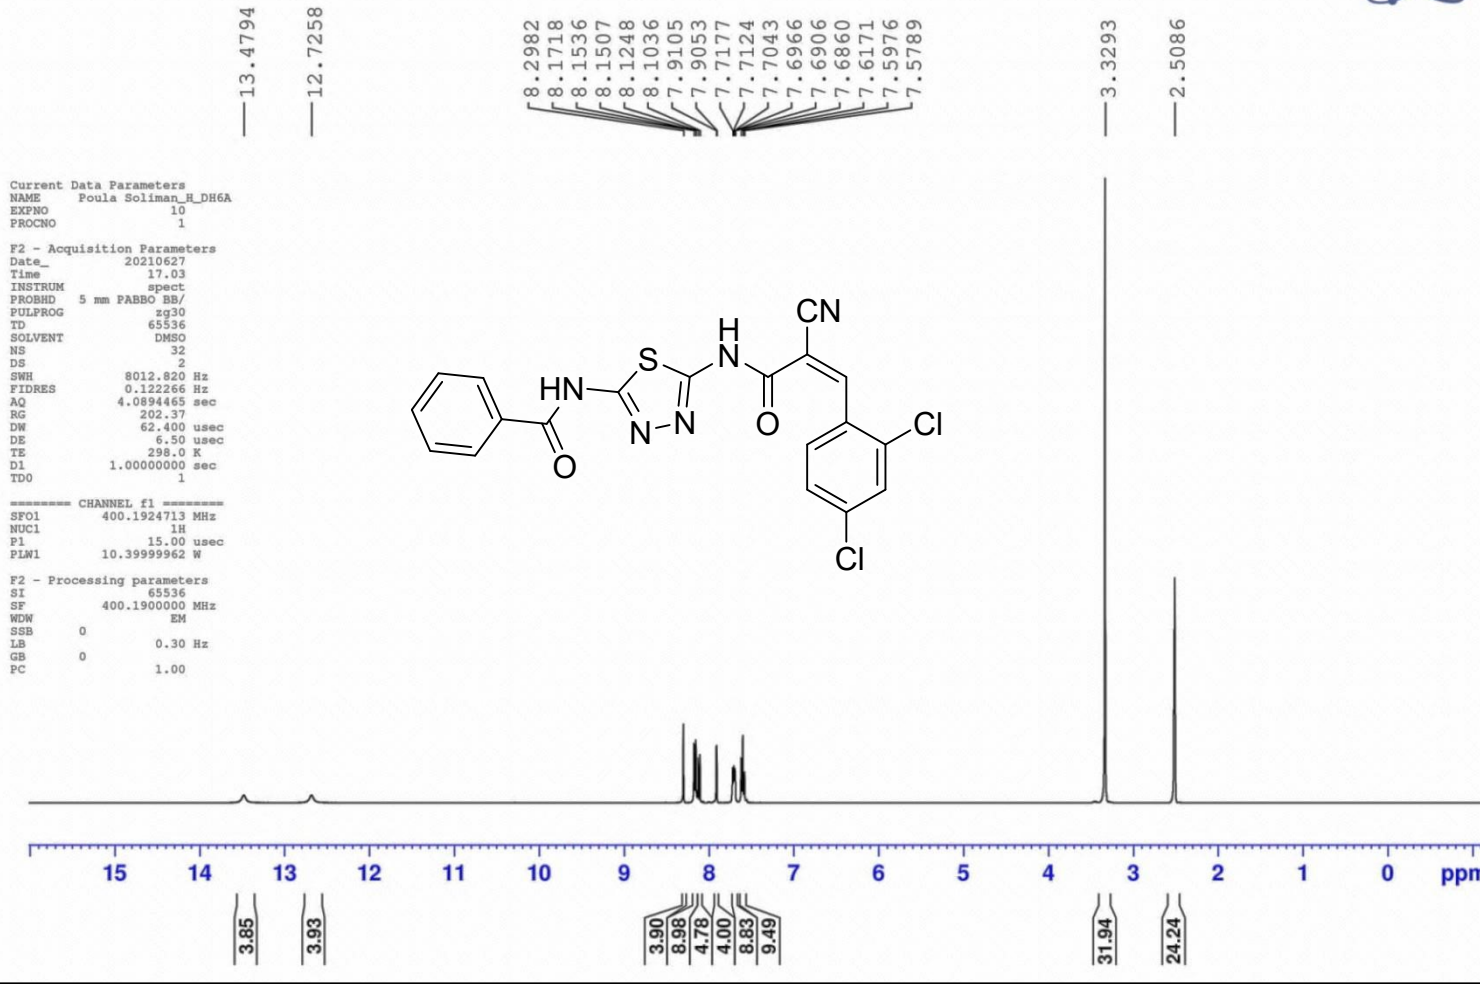

<sup>1</sup>H-NMR spectrum (DMSO-d<sub>6</sub>) of compound 7a

Poula Soliman\_H\_DH6A\_D2O

Microanalytical Unit - FOPCU - NMR laboratory  
www.pharma.cu.edu.eg dir-mau.fopcu@pharma.cu.edu.eg

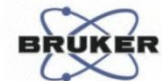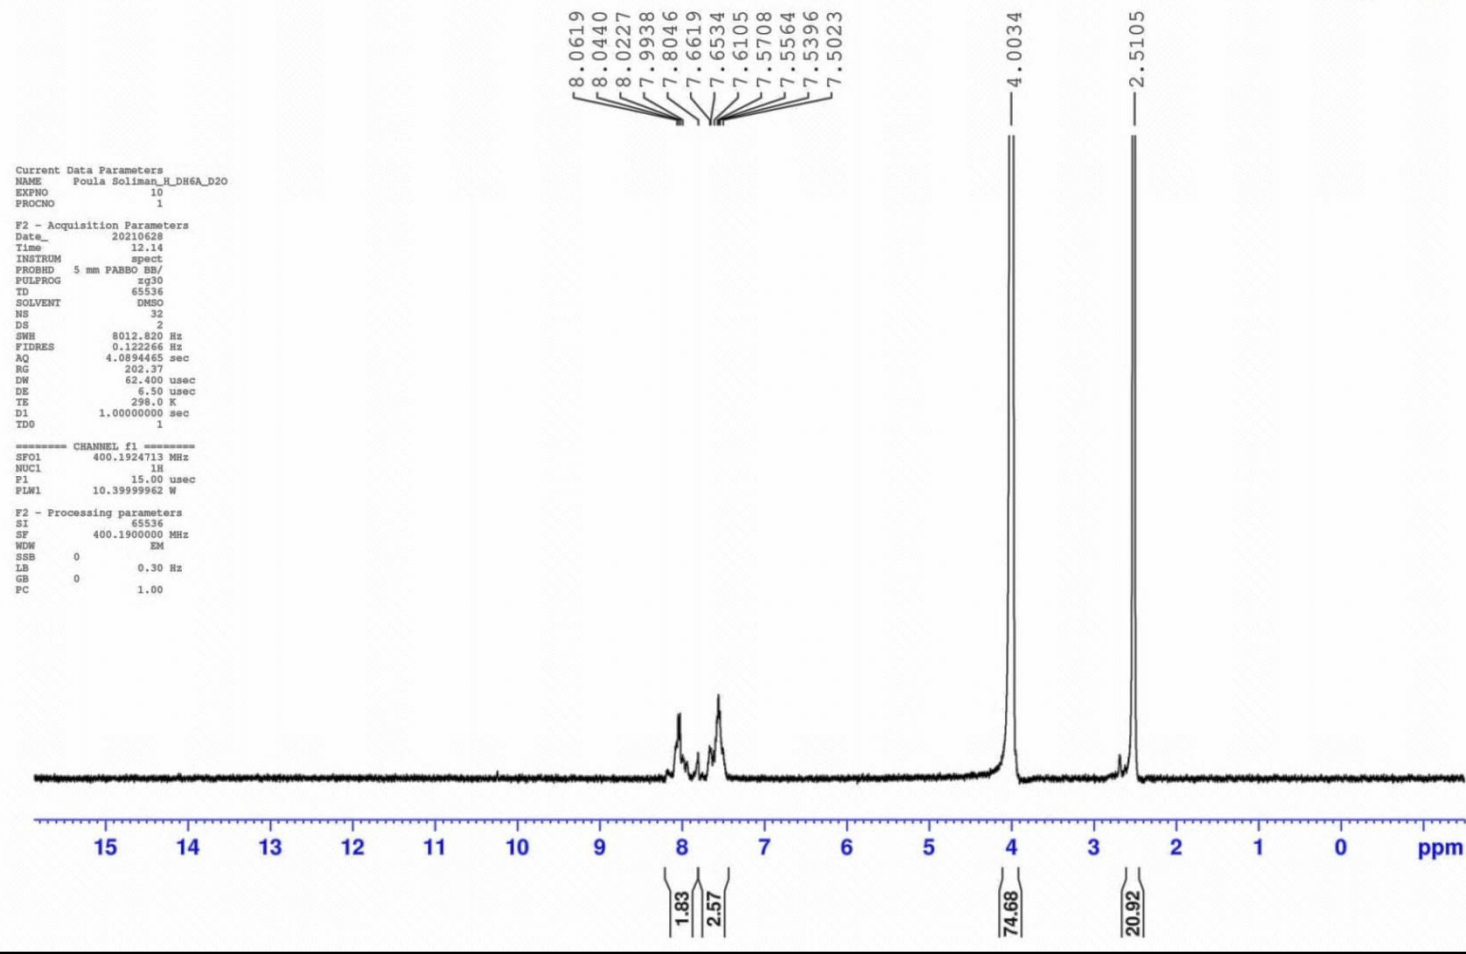

$^1\text{H-NMR}$  spectrum ( $\text{DMSO-d}_6 + \text{D}_2\text{O}$ ) of compound **7a**

Paula Soliman\_C\_DH6A

Microanalytical Unit - FOPCU - NMR laboratory  
www.pharma.cu.edu.eg dir-mau.fopcu@pharma.cu.edu.eg

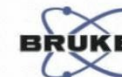

Current Data Parameters  
NAME Paula Soliman\_C\_DH6A  
EXPNO 10  
PROCNO 1

F2 - Acquisition Parameters  
Date\_ 20210628  
Time 10.00  
INSTRUM spect  
PROBHD 5 mm PABBO BB/  
PULPROG zgpg30  
TD 65536  
SOLVENT DMSO  
NS 1200  
DS 4  
SWH 24038.461 Hz  
FIDRES 0.366798 Hz  
AQ 1.3631488 sec  
RG 202.37  
DW 20.800 usec  
DE 6.50 usec  
TE 298.1 K  
D1 2.00000000 sec  
D11 0.03000000 sec  
TD0 1

----- CHANNEL f1 -----  
SFO1 100.6379178 MHz  
NUC1 13C  
P1 10.00 usec  
PLW1 45.00000000 W

----- CHANNEL f2 -----  
SFO2 400.1916008 MHz  
NUC2 1H  
CPDPRG[2] waltz16

170.69  
170.08  
160.49  
159.10  
156.91  
148.22  
146.39  
146.12  
136.85  
132.04  
131.93  
129.74  
117.93  
115.85  
112.94  
103.93  
40.62  
40.41  
40.20  
39.99  
39.78  
39.58  
39.37

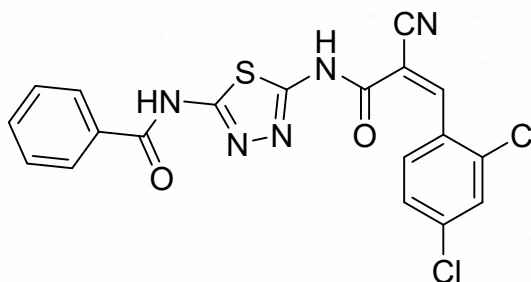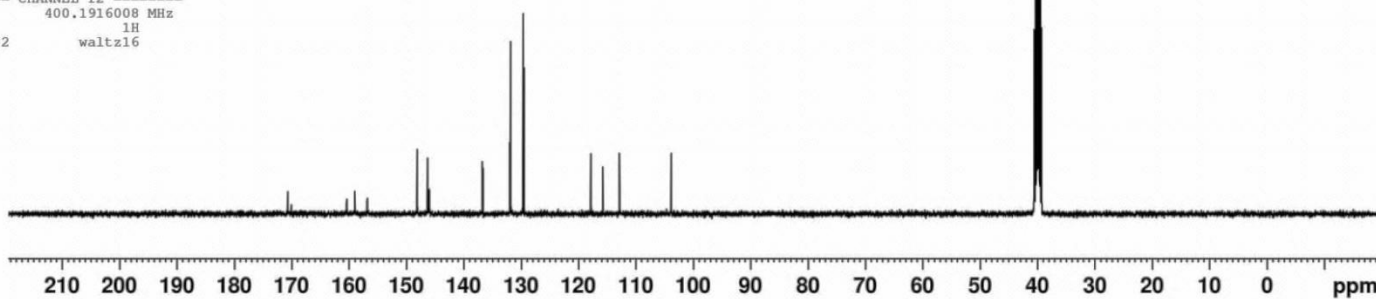

<sup>13</sup>C-NMR spectrum (DMSO-d<sub>6</sub>) of compound 7a



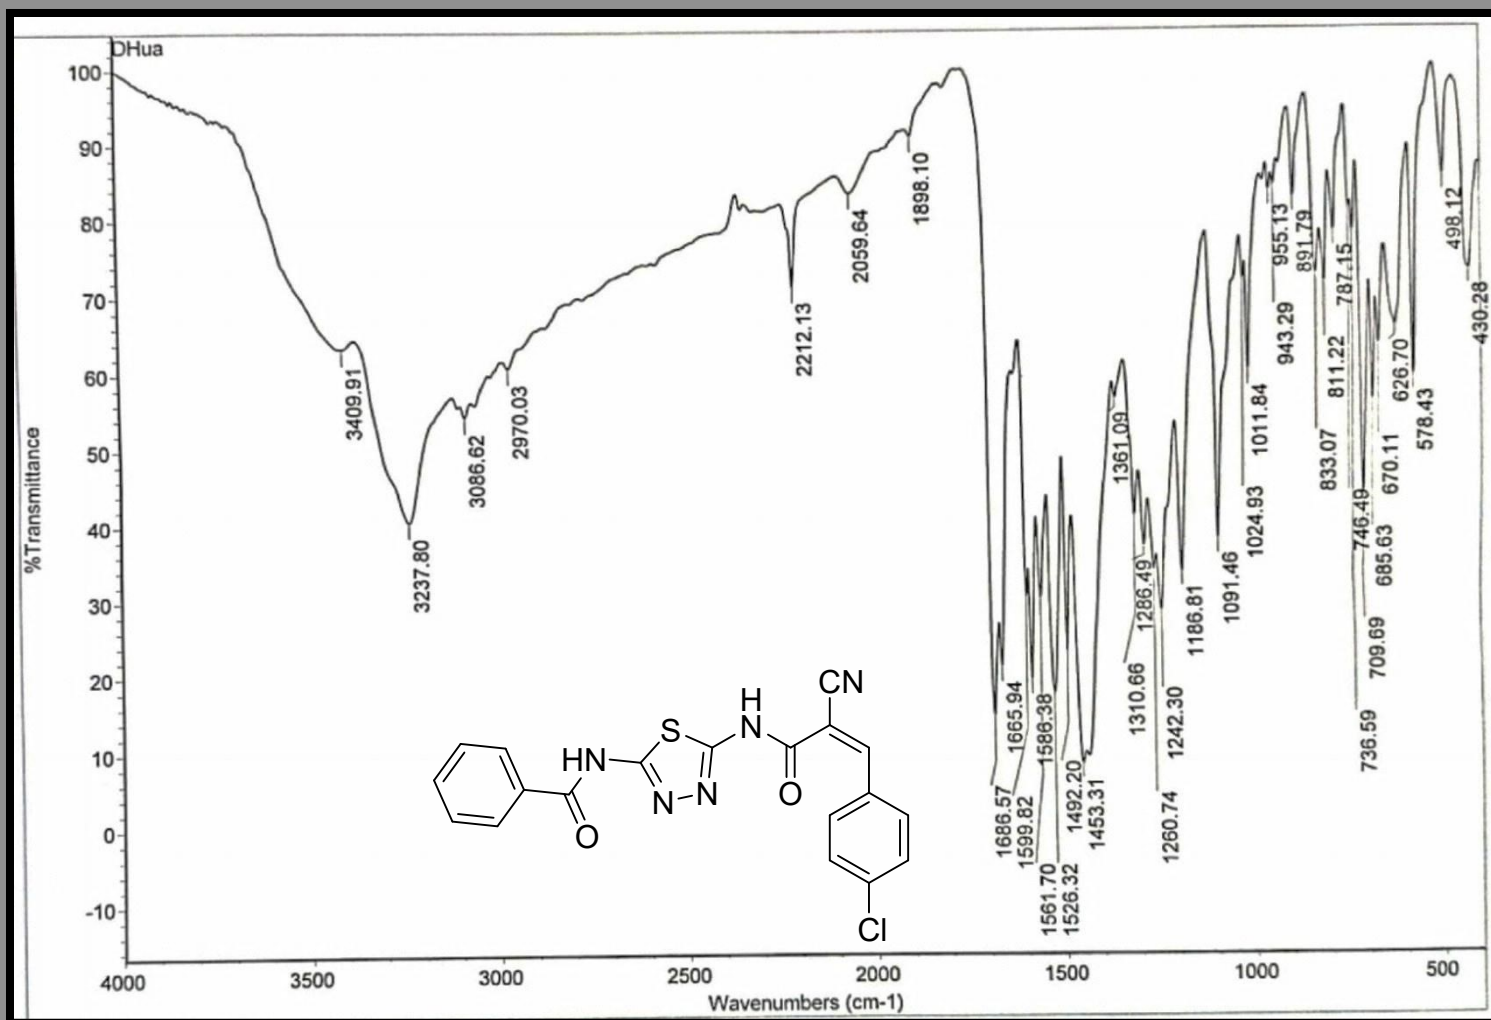

IR spectrum of compound **7b**

Paula Soliman\_H\_DH4A

Microanalytical Unit - FOPCU - NMR laboratory  
www.pharma.cu.edu.eg dir-mau.fopcu@pharma.cu.edu.eg

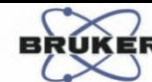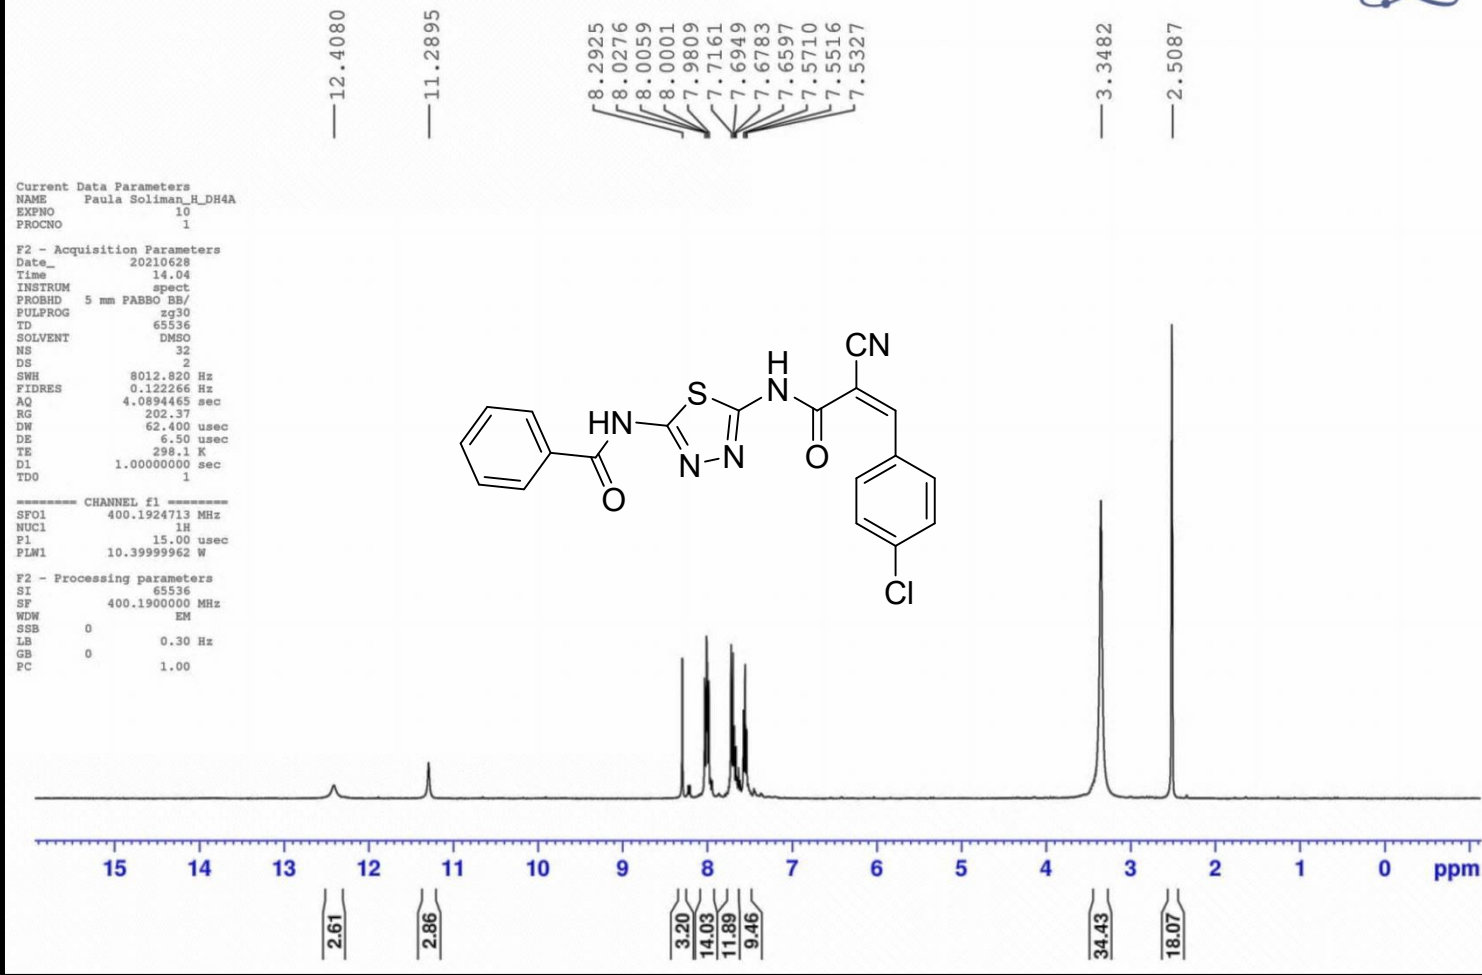

<sup>1</sup>H-NMR spectrum (DMSO-d<sub>6</sub>) of compound 7b

Paula Soliman\_H\_DH4A\_D2O

Microanalytical Unit - FOPCU - NMR laboratory  
www.pharma.cu.edu.eg dir-mau.fopcu@pharma.cu.edu.eg

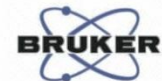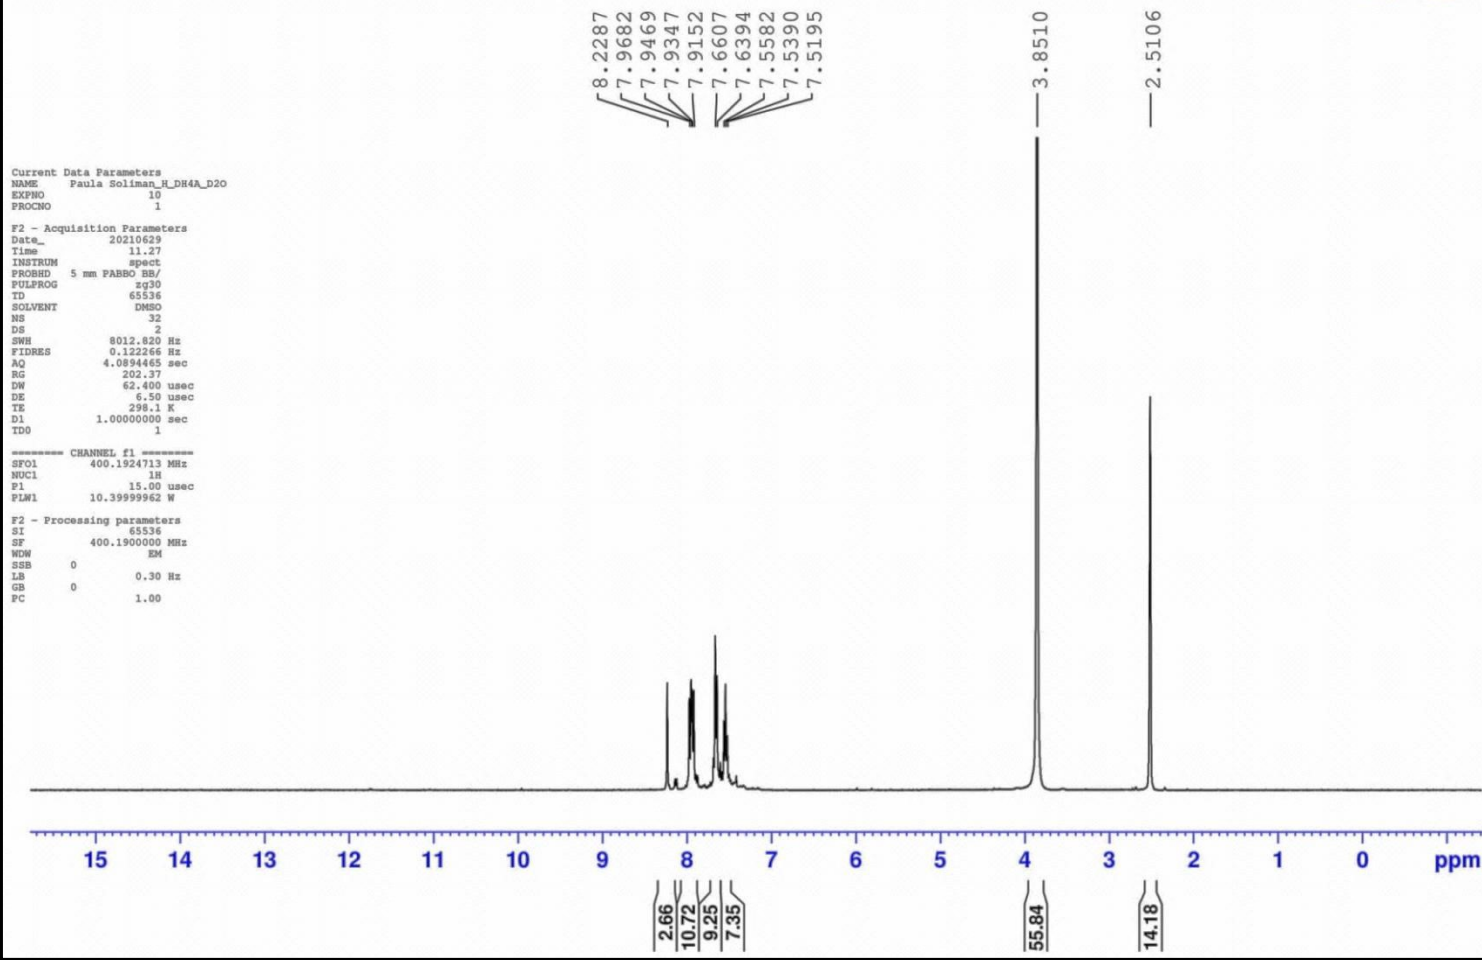

$^1\text{H}$ -NMR spectrum (DMSO- $d_6$ +  $\text{D}_2\text{O}$ ) of compound **7b**

Paula Soliman\_C\_DH4A

Microanalytical Unit - FOPCU - NMR laboratory  
www.pharma.cu.edu.eg dir-mau.fopcu@pharma.cu.edu.eg

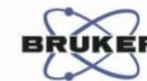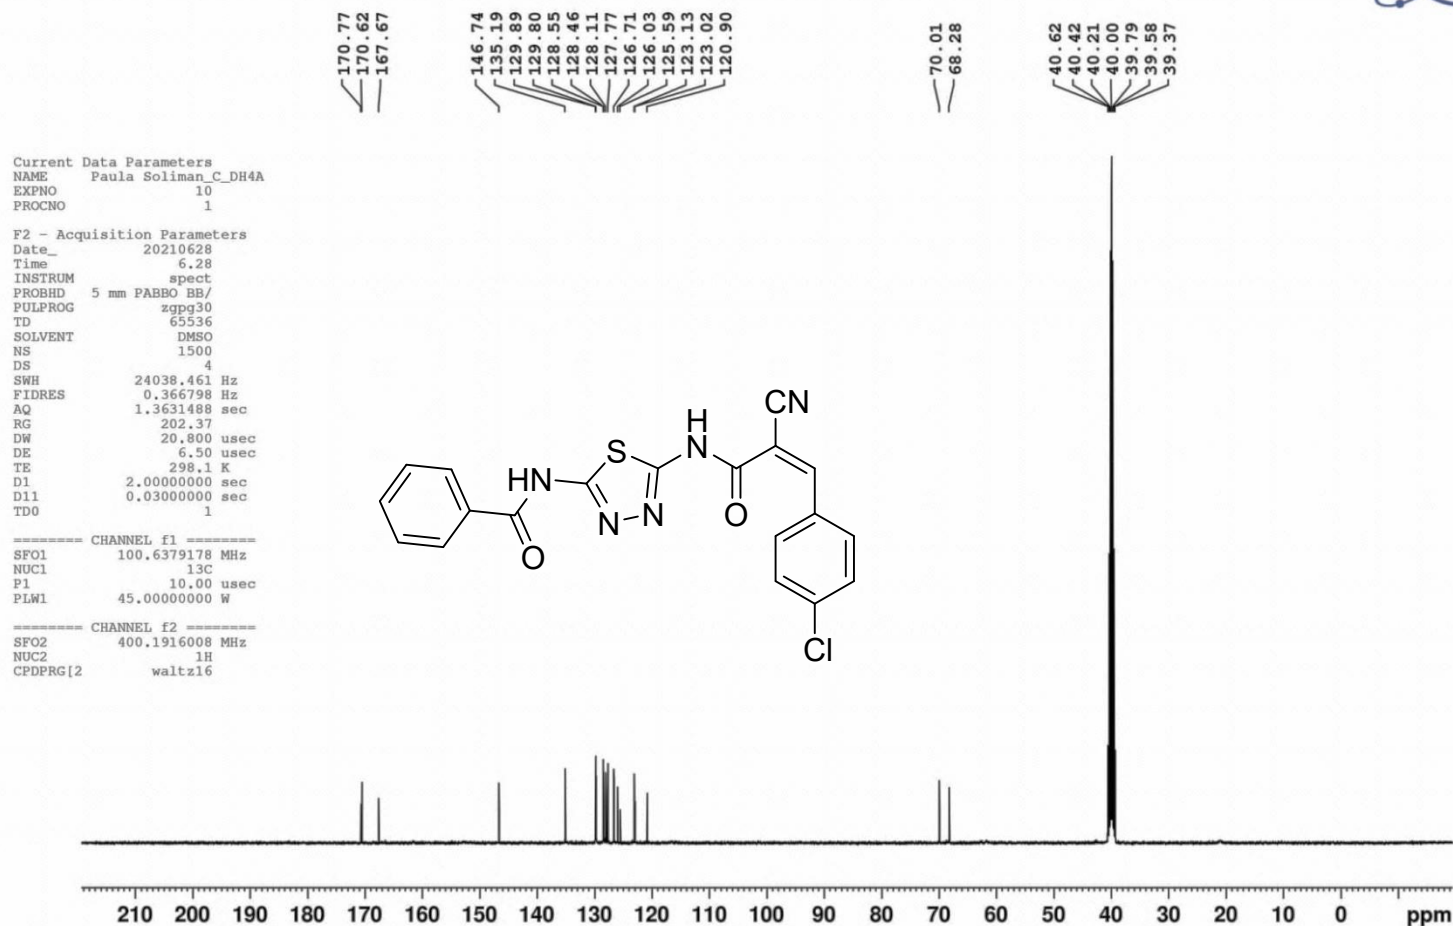

$^{13}\text{C}$ -NMR spectrum (DMSO- $d_6$ ) of compound **7b**

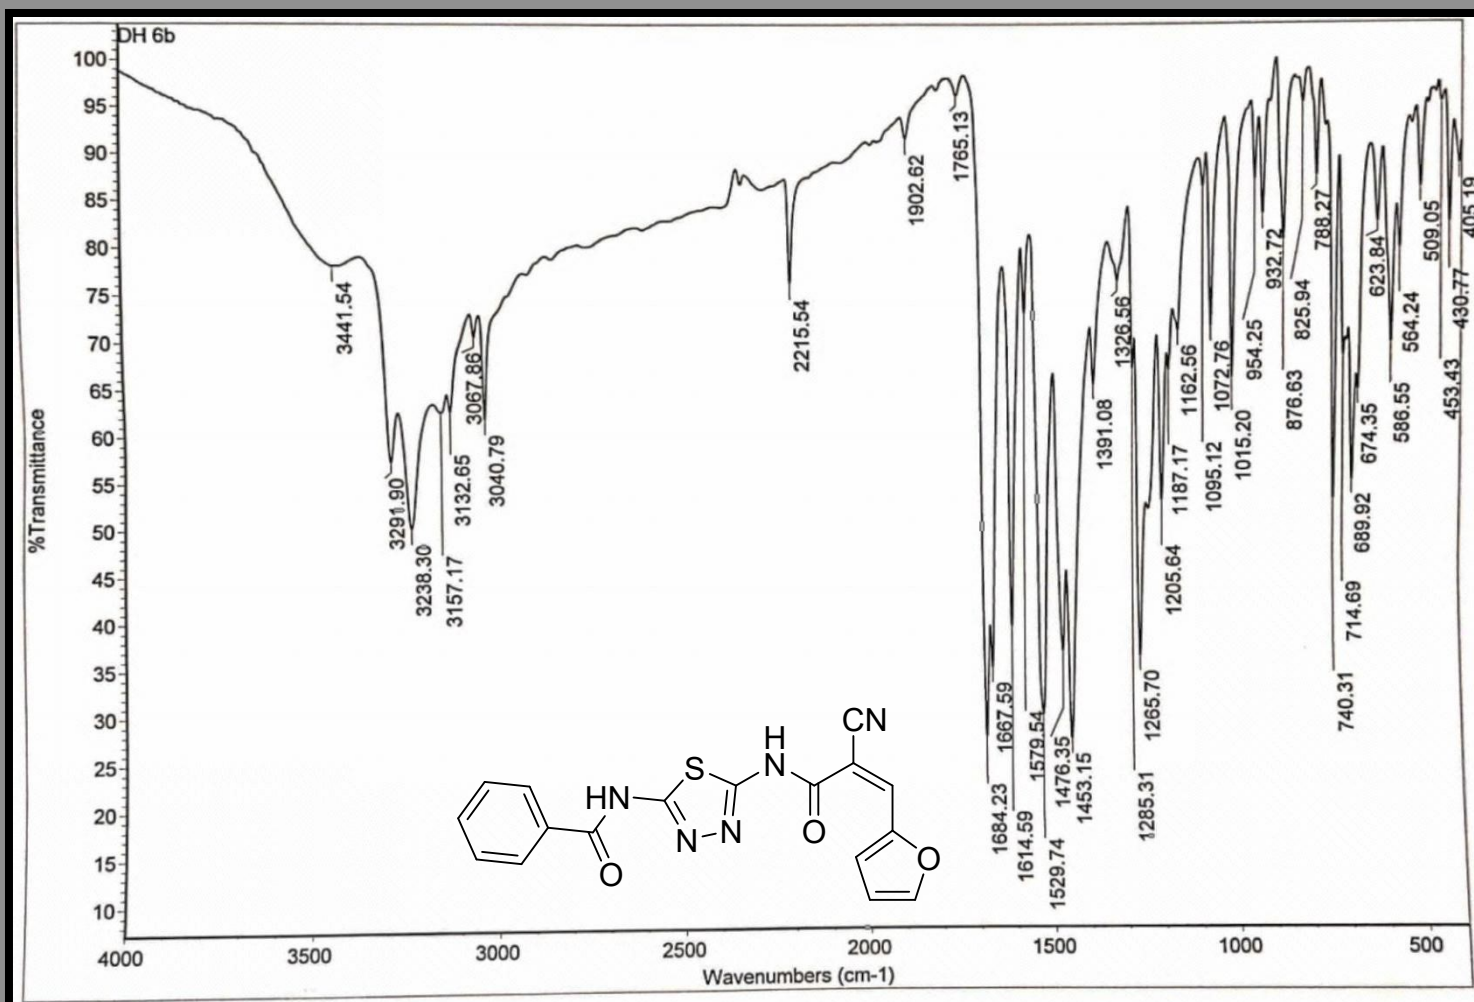

IR spectrum of compound 7c

Paula Soliman\_H\_DH6B

Microanalytical Unit - FOPCU - NMR laboratory  
www.pharma.cu.edu.eg dir-mau.fopcu@pharma.cu.edu.eg

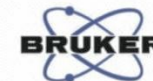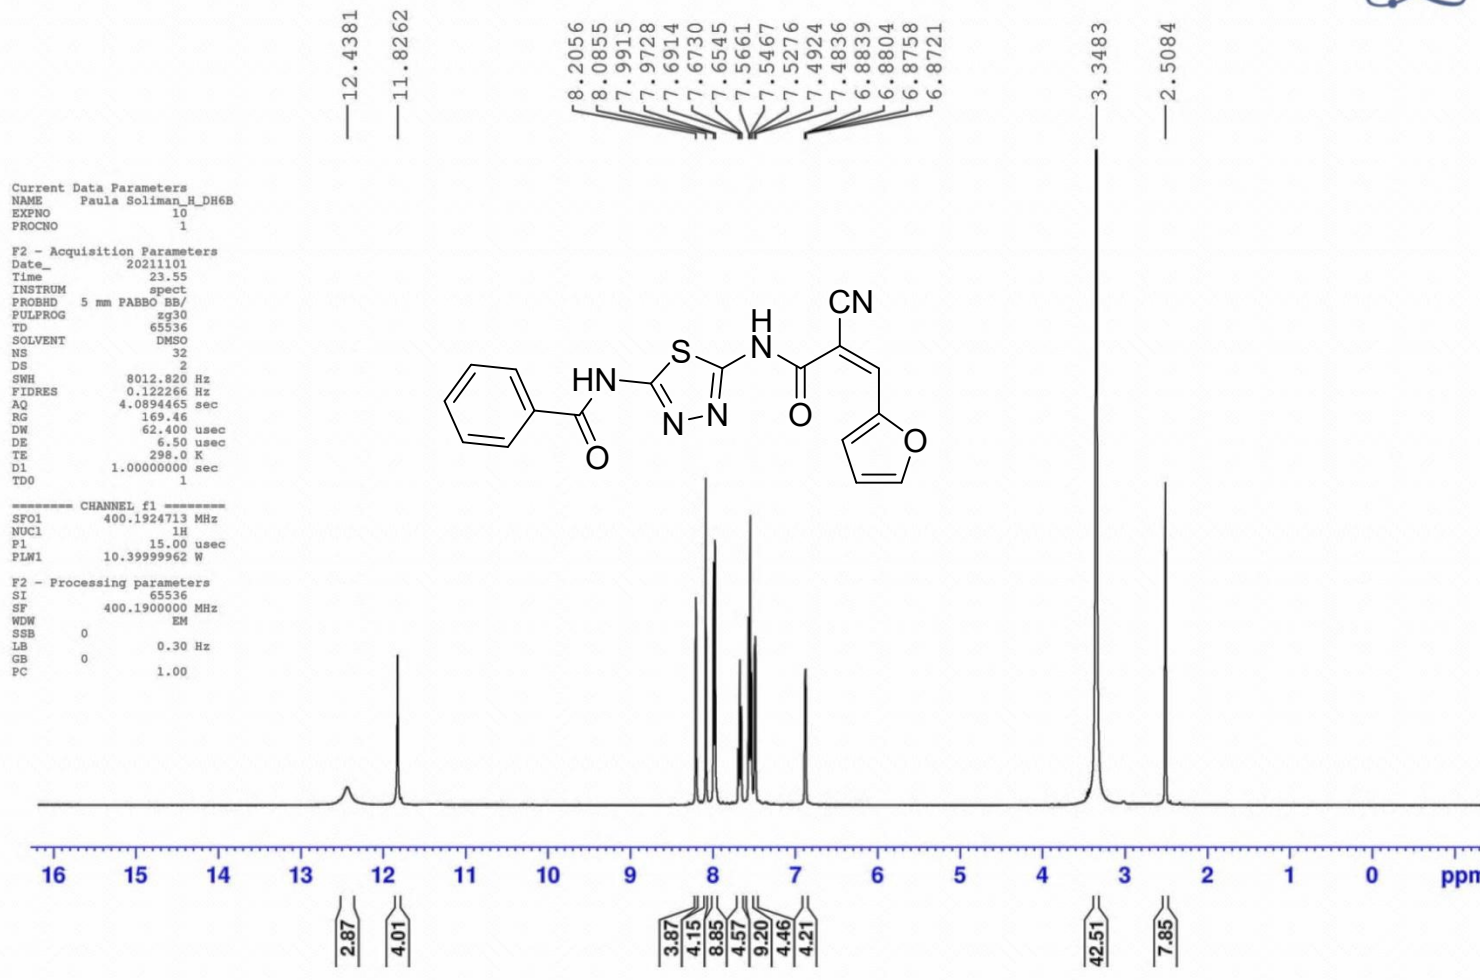

<sup>1</sup>H-NMR spectrum (DMSO-d<sub>6</sub>) of compound 7c

Paula Soliman\_H\_DH6B\_D2O

Microanalytical Unit - FOPCU - NMR laboratory  
www.pharma.cu.edu.eg dir-mau.fopcu@pharma.cu.edu.eg

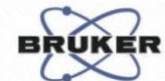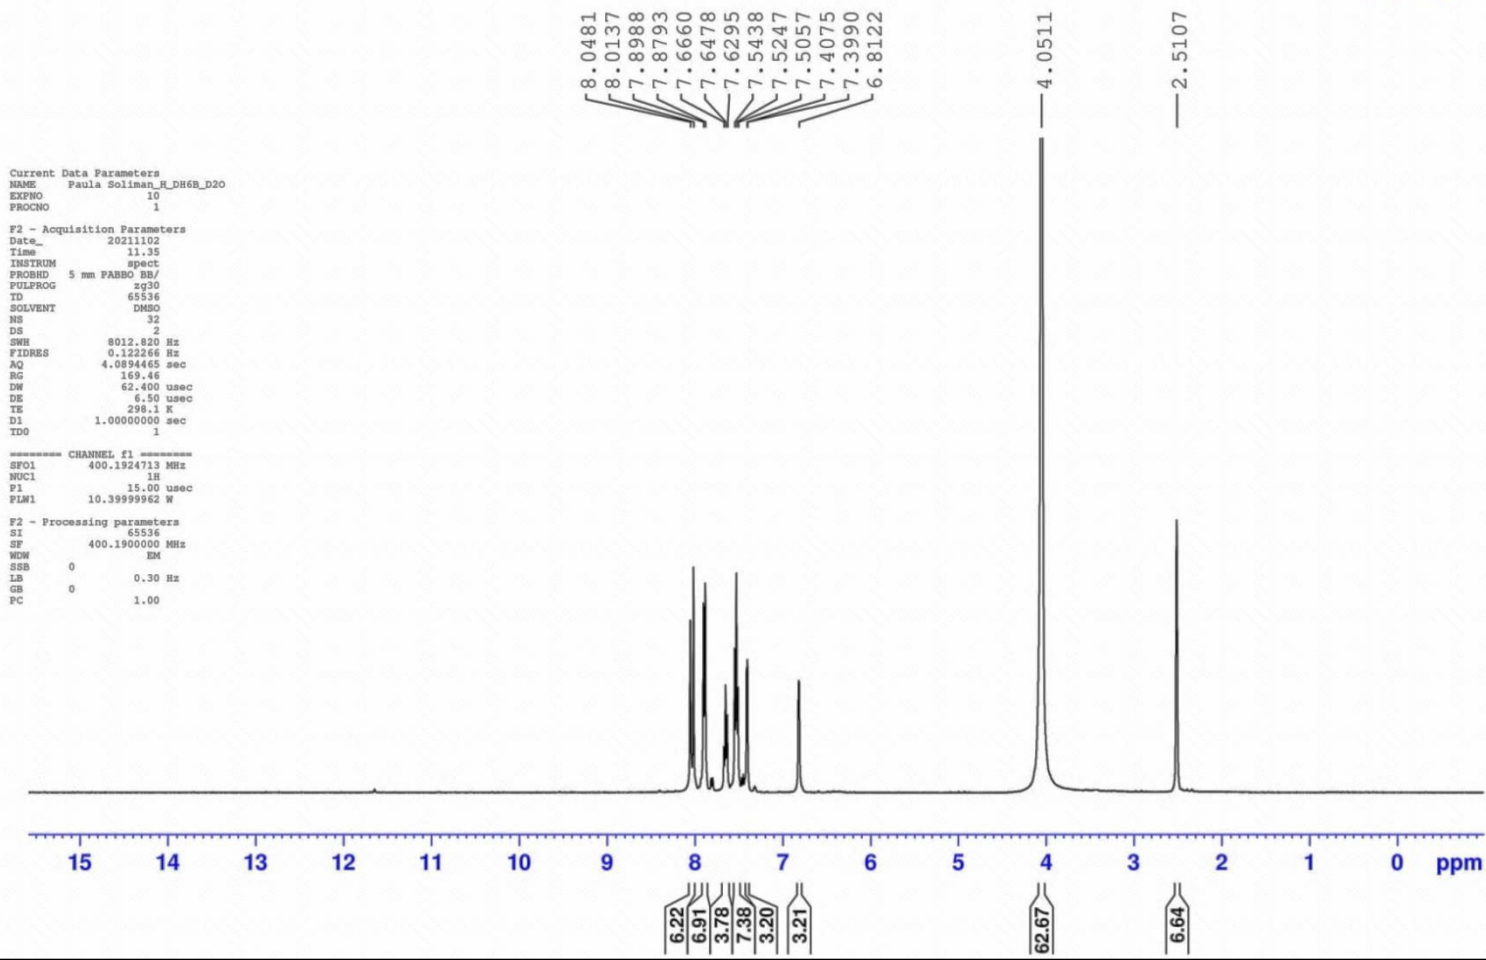

$^1\text{H}$ -NMR spectrum (DMSO- $d_6$ +D $_2$ O) of compound 7c

Paula Soliman\_C\_DH6b

Microanalytical Unit - FOPCU - NMR laboratory  
www.pharma.cu.edu.eg dir-mau.fopcu@pharma.cu.edu.eg

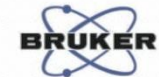

170.65  
167.98  
153.43  
141.39  
135.63  
132.67  
131.00  
129.58  
127.11  
124.76  
124.32  
121.51  
118.04  
117.04  
102.91  
40.61  
40.40  
40.19  
39.99  
39.78  
39.57  
39.36

Current Data Parameters  
NAME Paula Soliman\_C\_DH6b  
EXPNO 10  
PROCNO 1

F2 - Acquisition Parameters  
Date\_ 20211102  
Time 9.52  
INSTRUM spect  
PROBHD 5 mm PABBO BB/  
PULPROG zgpg30  
TD 65536  
SOLVENT DMSO  
NS 1500  
DS 4  
SWH 24038.461 Hz  
FIDRES 0.366798 Hz  
AQ 1.3631488 sec  
RG 202.37  
DW 20.800 usec  
DE 6.50 usec  
TE 298.0 K  
D1 2.00000000 sec  
D11 0.03000000 sec  
TD0 1

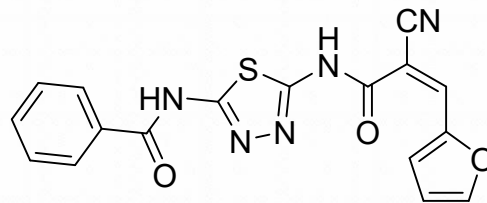

----- CHANNEL f1 -----  
SFO1 100.6379178 MHz  
NUC1 13C  
P1 10.00 usec  
PLW1 45.00000000 W  
----- CHANNEL f2 -----  
SFO2 400.1916008 MHz  
NUC2 1H  
CPDPRG[2] waltz16

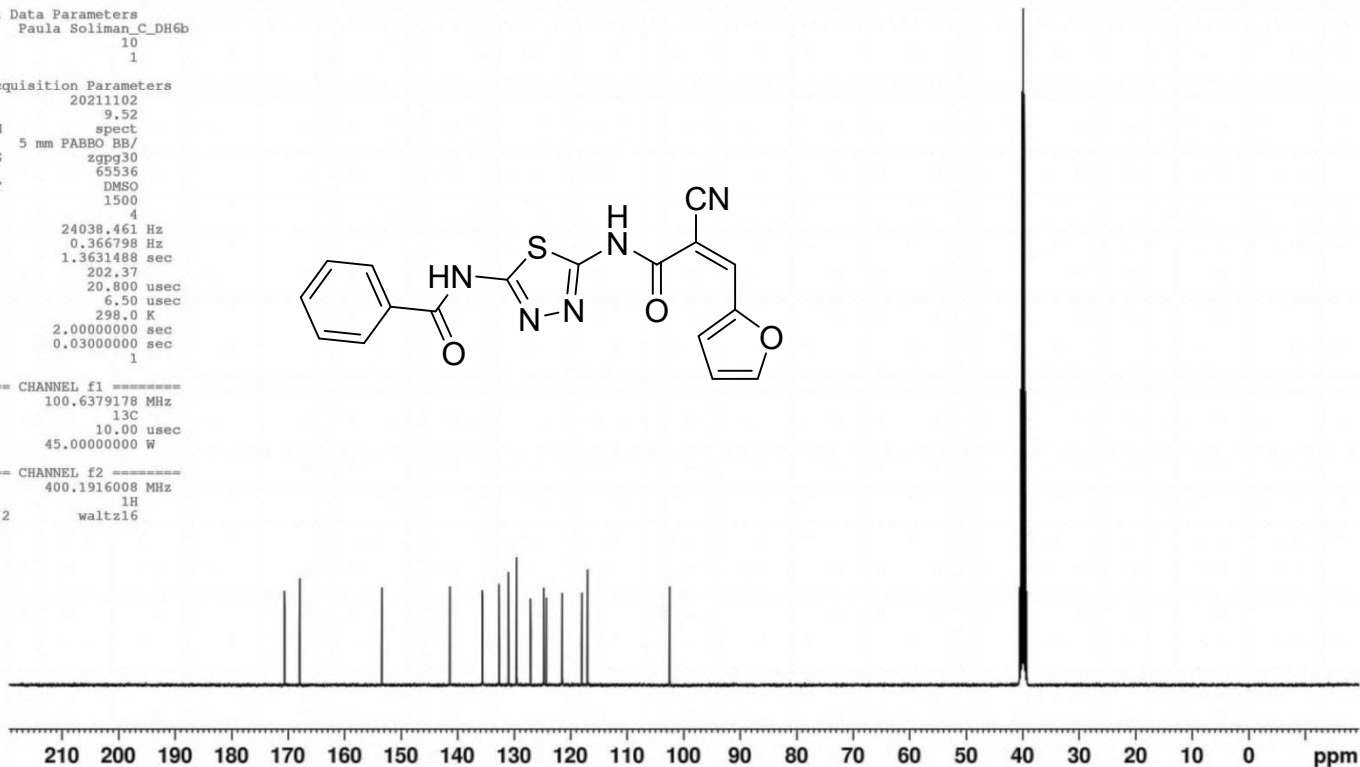

<sup>13</sup>C-NMR spectrum (DMSO-d<sub>6</sub>) of compound 7c



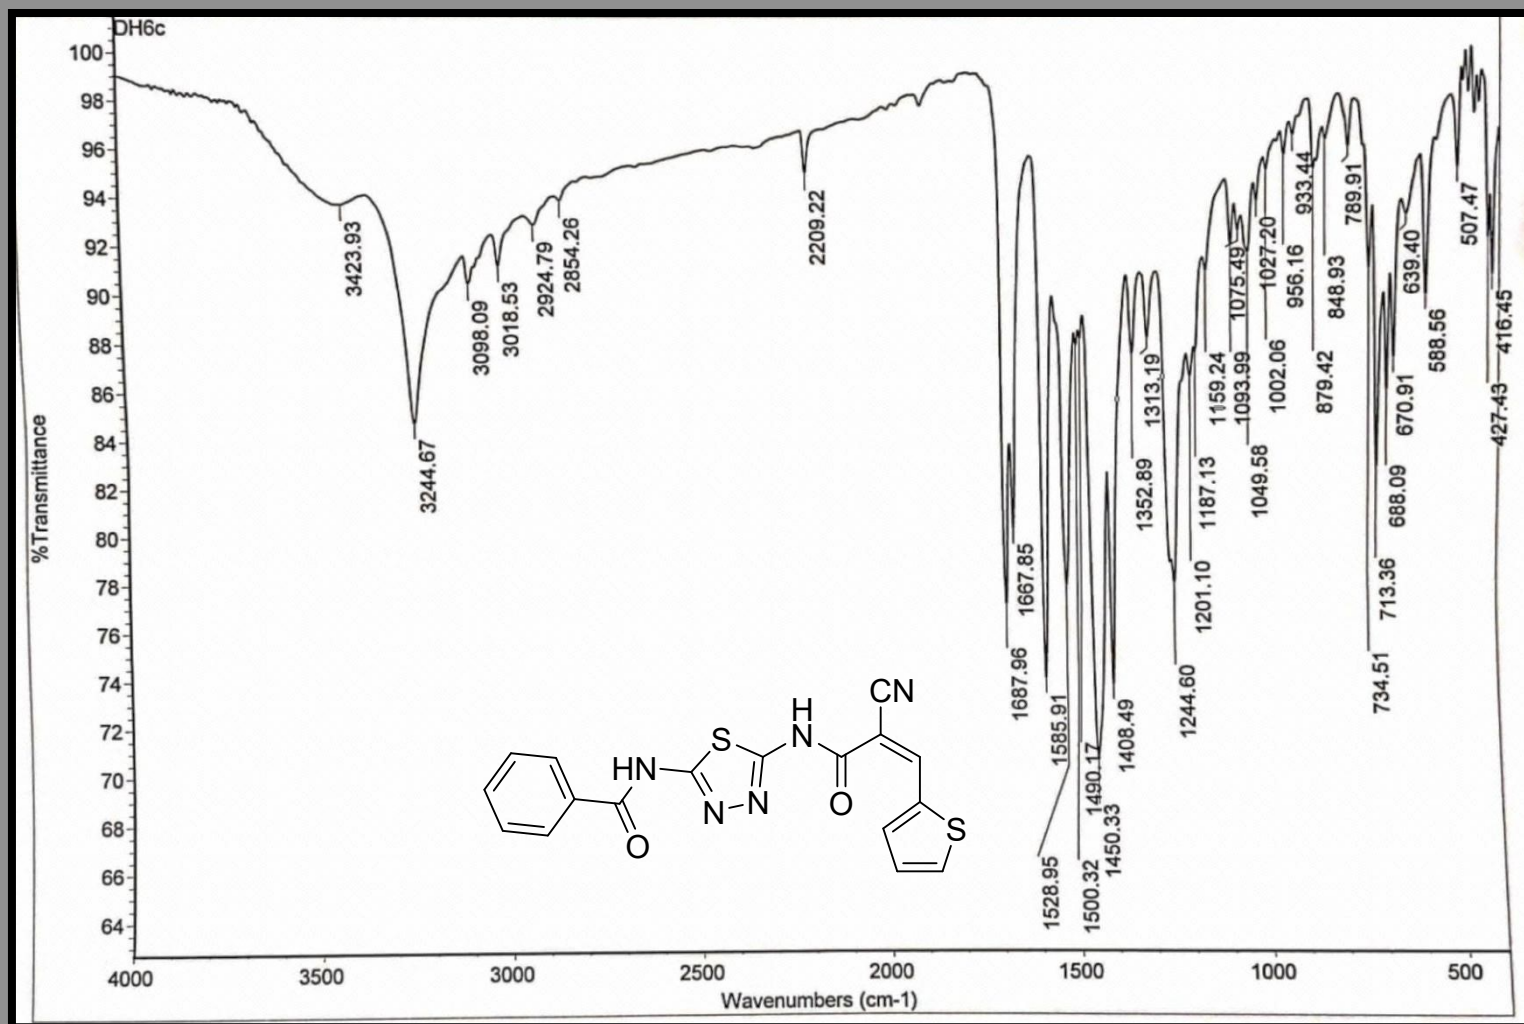

IR spectrum of compound 7d

Paula Soliman\_H\_DH6C

Microanalytical Unit - FOPCU - NMR laboratory  
www.pharma.cu.edu.eg dir-mau.fopcu@pharma.cu.edu.eg

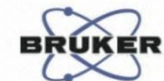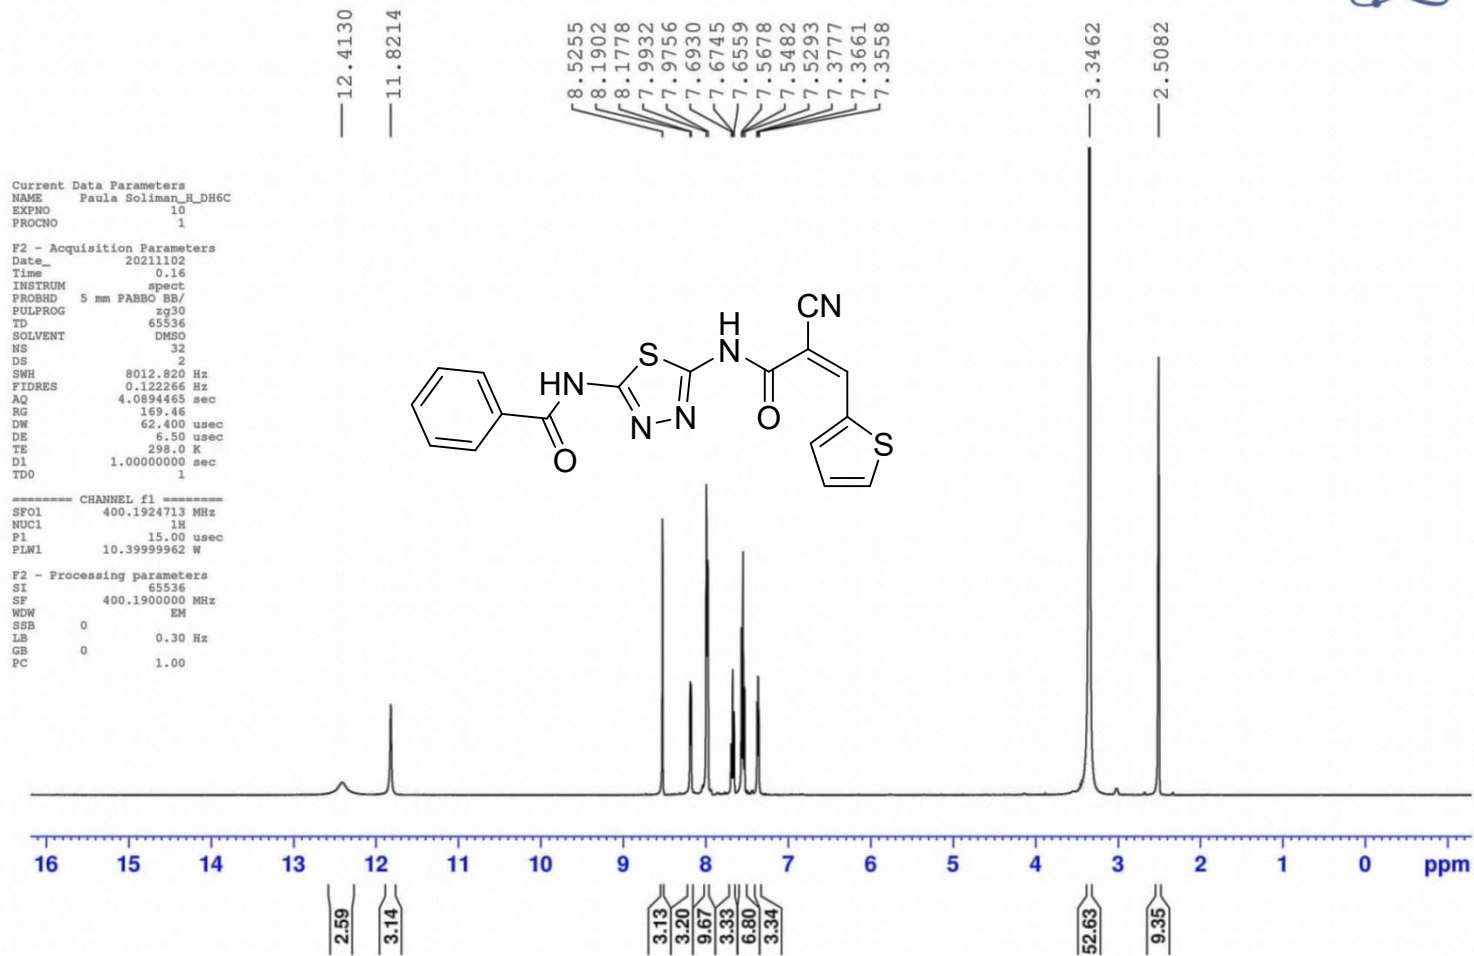

<sup>1</sup>H-NMR spectrum (DMSO-d<sub>6</sub>) of compound 7d

Paula Soliman\_H\_DH6C\_D2O

Microanalytical Unit - FOPCU - NMR laboratory  
www.pharma.cu.edu.eg dir-mau.fopcu@pharma.cu.edu.eg

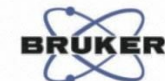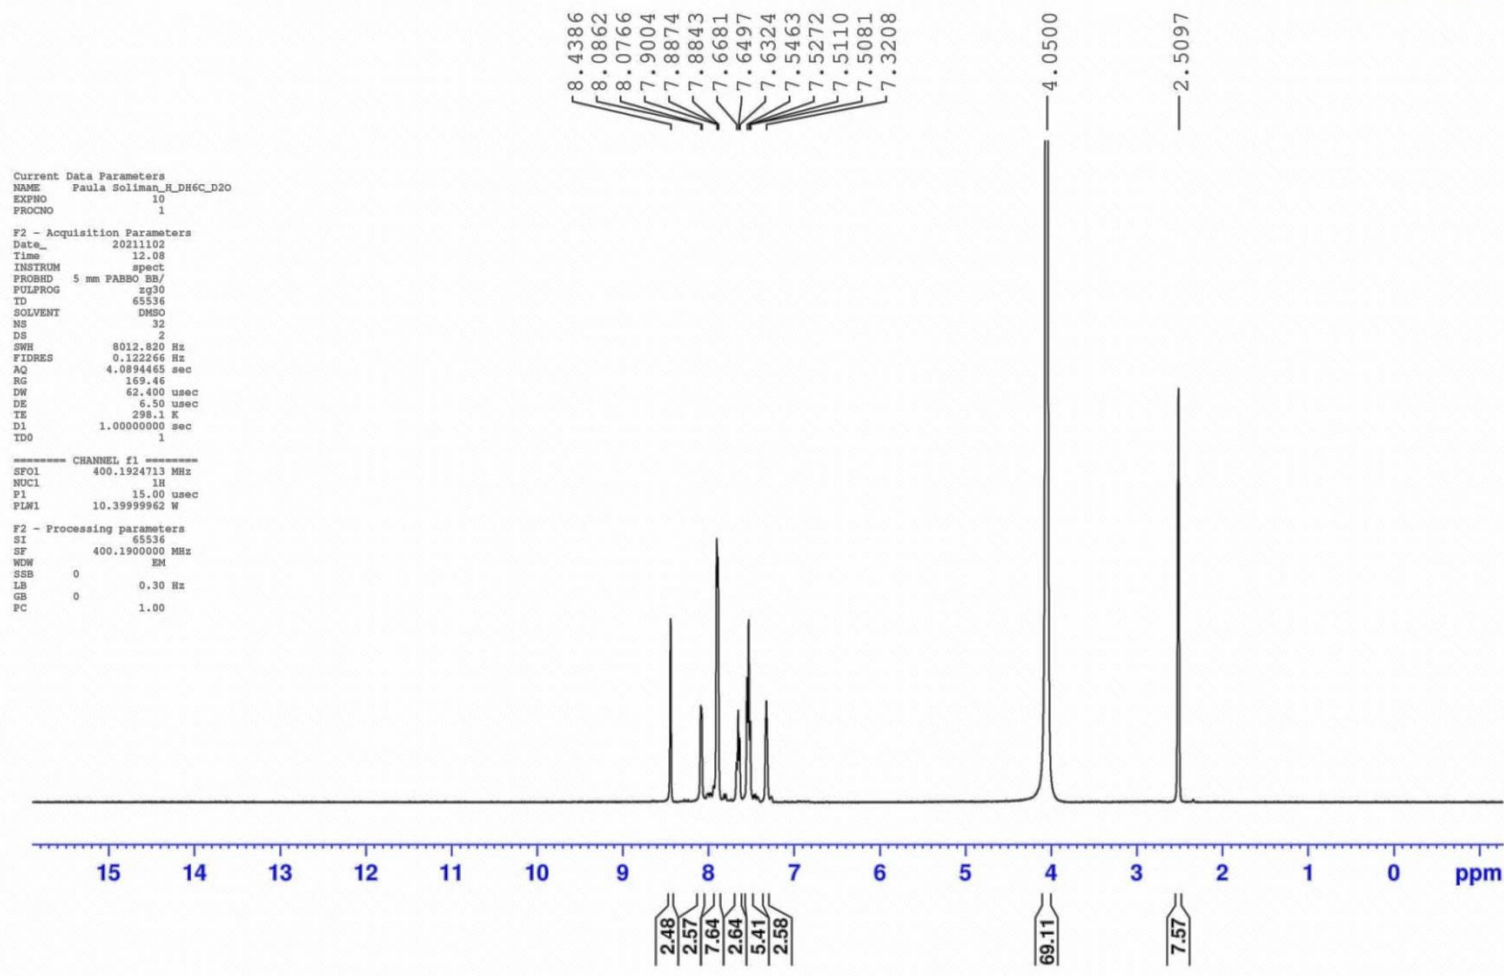

<sup>1</sup>H-NMR spectrum (DMSO-d<sub>6</sub>+ D<sub>2</sub>O) of compound **7d**

Paula Soliman\_C\_DH6c

Microanalytical Unit - FOPCU - NMR laboratory  
www.pharma.cu.edu.eg dir-mau.fopcu@pharma.cu.edu.eg

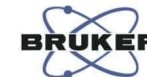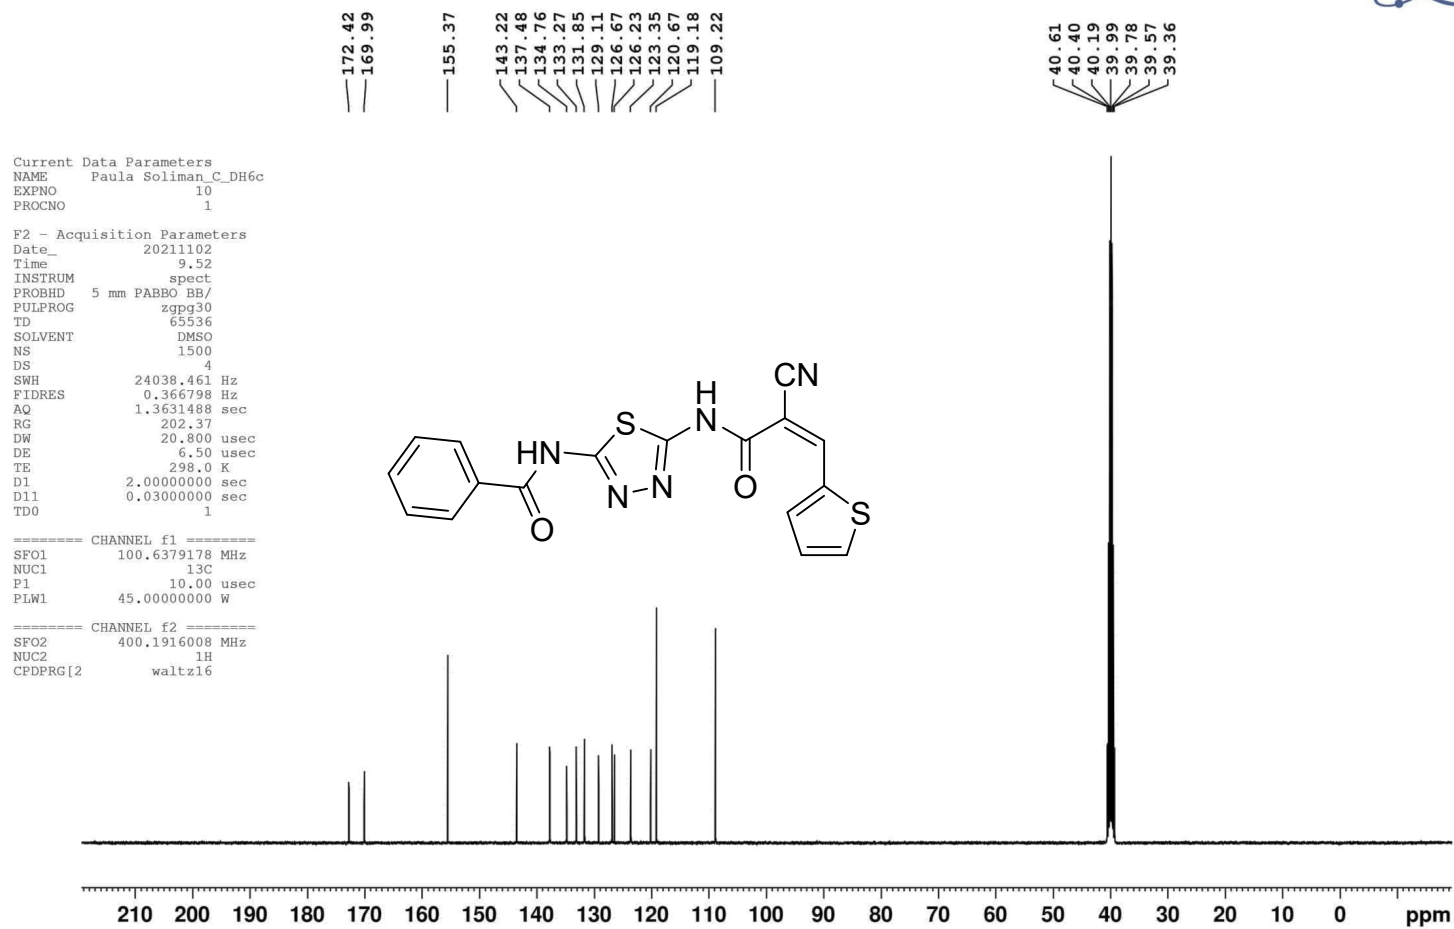

$^{13}\text{C}$ -NMR spectrum (DMSO- $d_6$ ) of compound **7d**

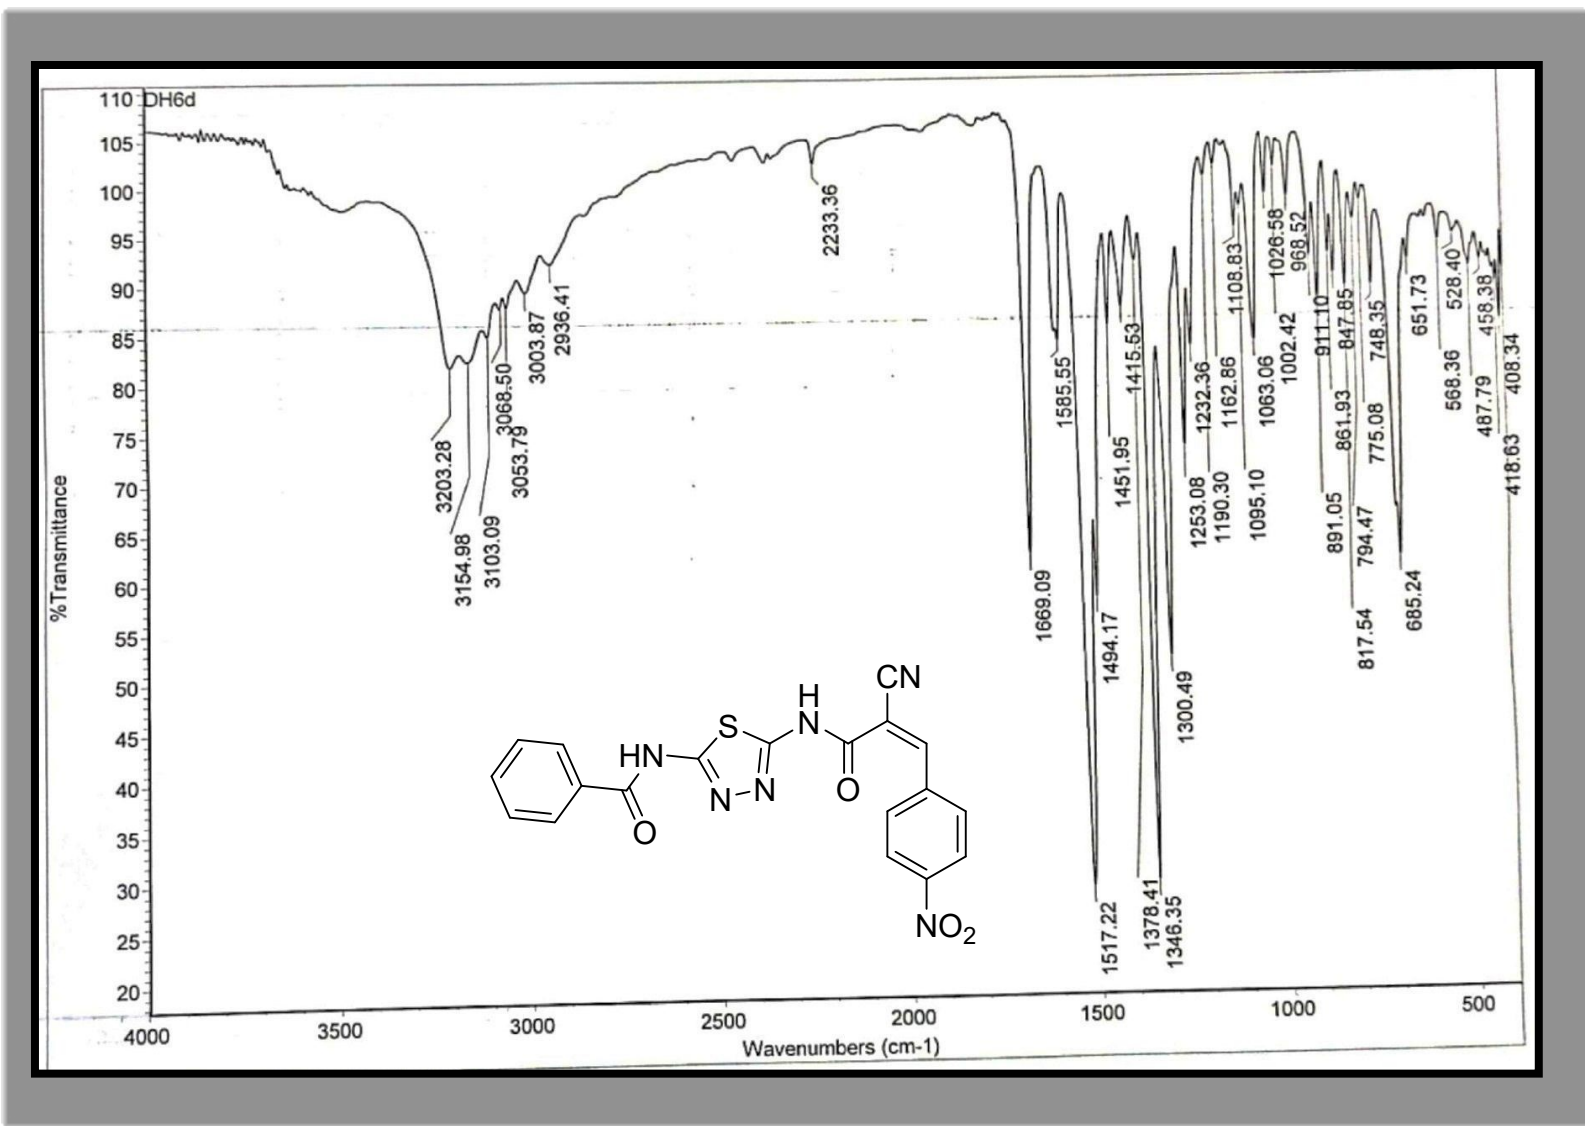

IR spectrum of compound 7e

Paula Soliman\_H\_DH6d

Microanalytical Unit - FOPCU - NMR laboratory  
www.pharma.cu.edu.eg dir-mau.fopcu@pharma.cu.edu.eg

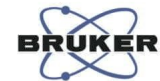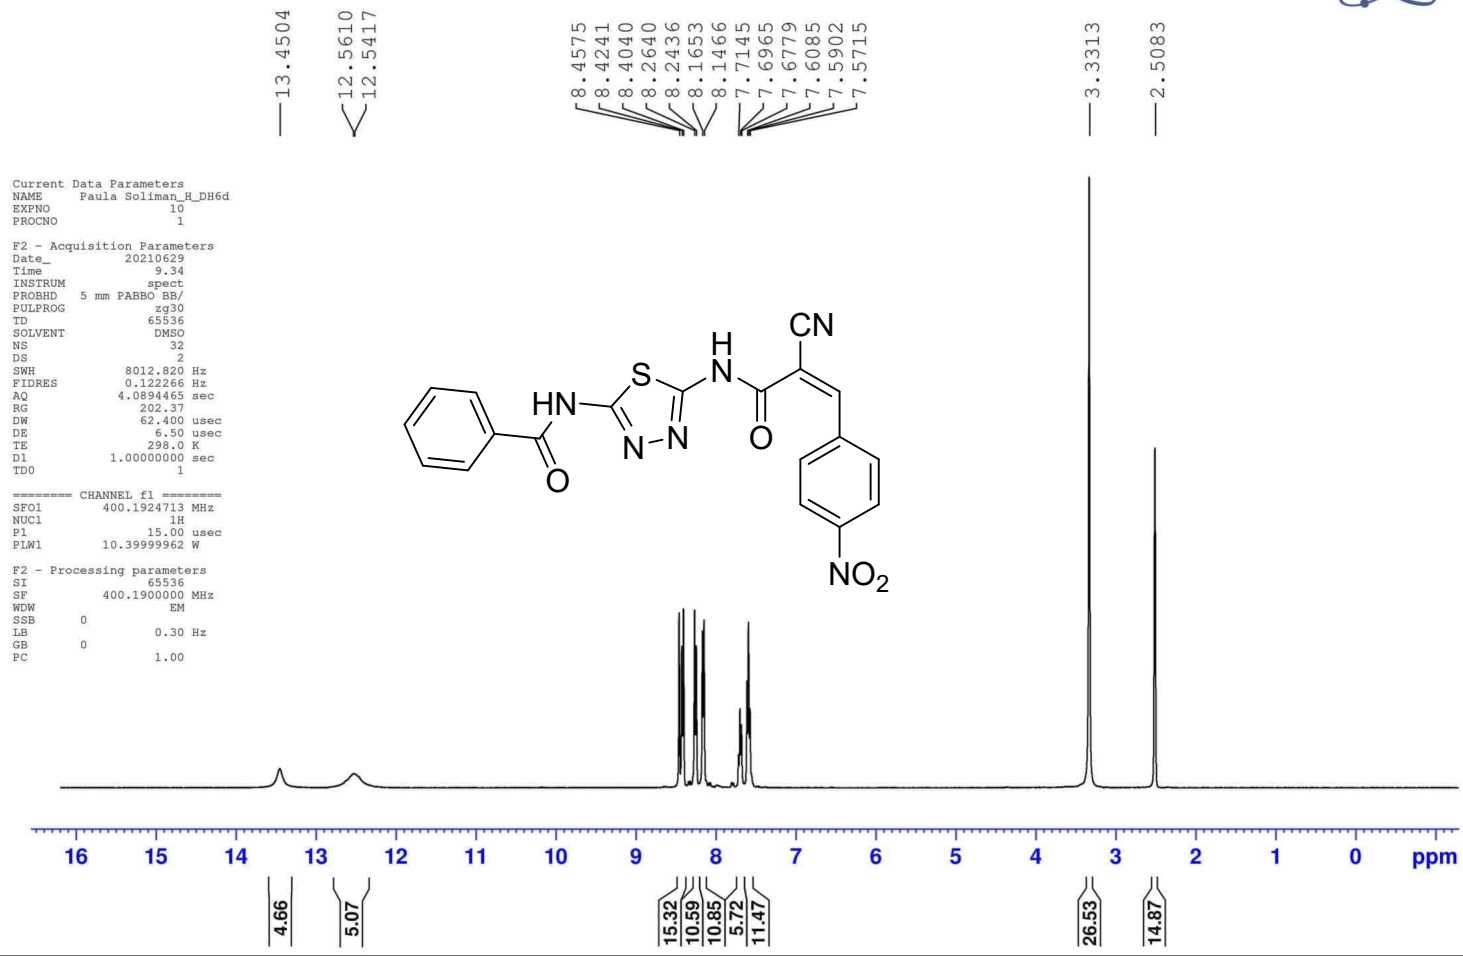

<sup>1</sup>H-NMR spectrum (DMSO-d<sub>6</sub>) of compound 7e

Paula Soliman\_H\_DH6d\_D2O

Microanalytical Unit - FOPCU - NMR laboratory  
www.pharma.cu.edu.eg dir-mau.fopcu@pharma.cu.edu.eg

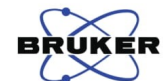

```
Current Data Parameters
NAME Paula Soliman_H_DH6d_D2O
EXPNO 10
PROCNO 1

F2 - Acquisition Parameters
Date_ 20210629
Time 11.21
INSTRUM spect
PROBHD 5 mm PABBO BB/
PULPROG zg30
TD 65536
SOLVENT DMSO
NS 32
DS 2
SWH 8012.826 Hz
FIDRES 0.122266 Hz
AQ 4.0894465 sec
RG 202.37
DW 62.400 usec
DE 6.50 usec
TE 298.0 K
D1 1.00000000 sec
TD0 1

===== CHANNEL f1 =====
SFO1 400.1924713 MHz
NUC1 1H
P1 15.00 usec
PLW1 10.39999962 W

F2 - Processing parameters
SI 65536
SF 400.1900000 MHz
WDW EM
SSB 0
LB 0.30 Hz
GB 0
FC 1.00
```

8.3765  
8.1787  
8.1471  
8.1268  
8.0816  
8.0560  
8.0368  
7.6630  
7.5572

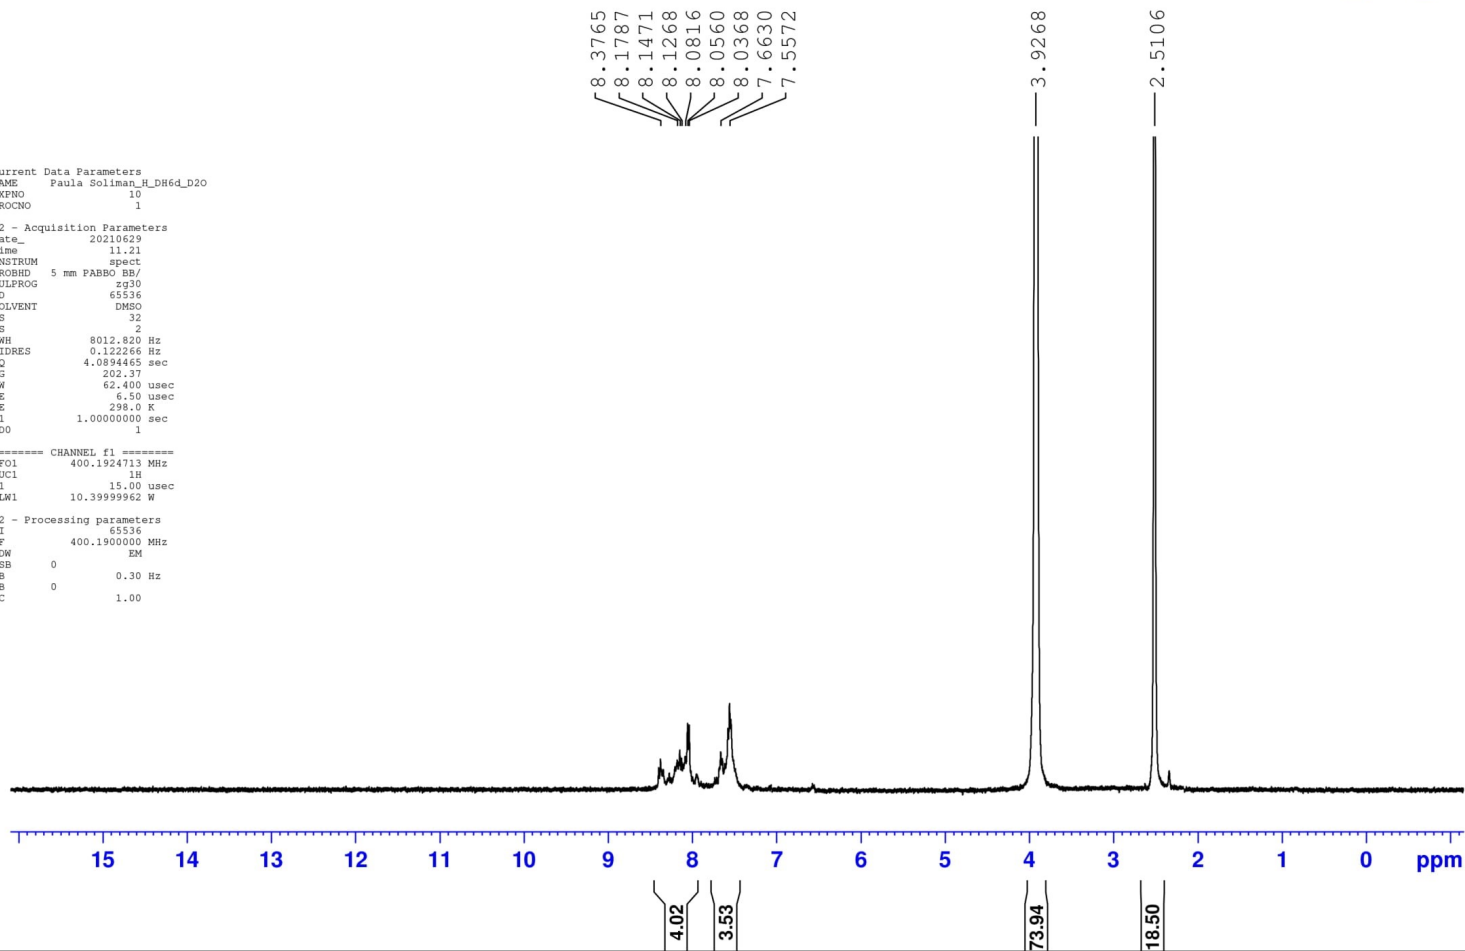

$^1\text{H-NMR}$  spectrum ( $\text{DMSO-d}_6 + \text{D}_2\text{O}$ ) of compound 7e

Paula Soliman\_C\_DH6d

Microanalytical Unit - FOPCU - NMR laboratory  
www.pharma.cu.edu.eg dir-mau.fopcu@pharma.cu.edu.eg

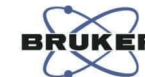

174.73  
174.14  
170.82  
161.47  
160.65  
154.35  
148.16  
135.78  
134.62  
131.25  
131.05  
130.28  
129.52  
129.28  
117.83  
116.98  
113.29  
112.94  
40.62  
40.41  
40.20  
39.99  
39.78  
39.57  
39.37

Current Data Parameters  
NAME Paula Soliman\_C\_DH6d  
EXPNO 10  
PROCNO 1

F2 - Acquisition Parameters

Date\_ 20210629  
Time 9.45  
INSTRUM spect  
PROBHD 5 mm PABBO BB/  
PULPROG zgpg30  
TD 65536  
SOLVENT DMSO  
NS 1200  
DS 4  
SWH 24038.461 Hz  
FIDRES 0.366798 Hz  
AQ 1.3631488 sec  
RG 202.37  
DW 20.800 usec  
DE 6.50 usec  
TE 298.1 K  
D1 2.0000000 sec  
D11 0.03000000 sec  
TDO 1

===== CHANNEL f1 =====  
SFO1 100.6379178 MHz  
NUC1 13C  
P1 10.00 usec  
PLW1 45.00000000 W

===== CHANNEL f2 =====  
SFO2 400.1916008 MHz  
NUC2 1H  
CPDPRG[2] waltz16

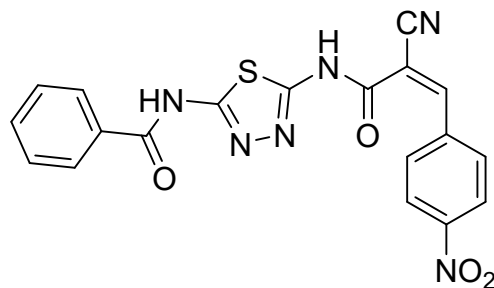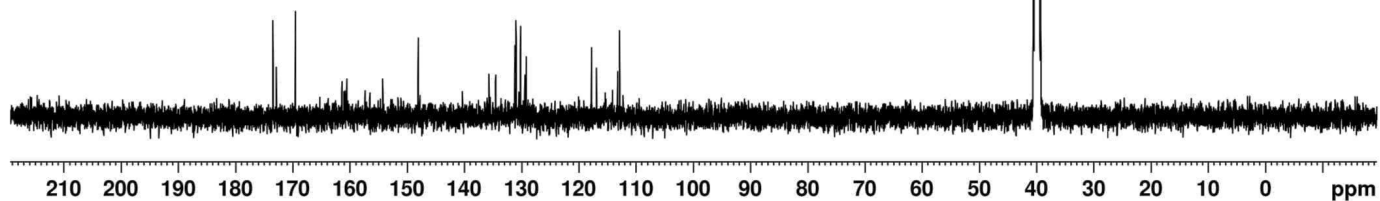

<sup>13</sup>C-NMR spectrum (DMSO-d<sub>6</sub>) of compound 7e



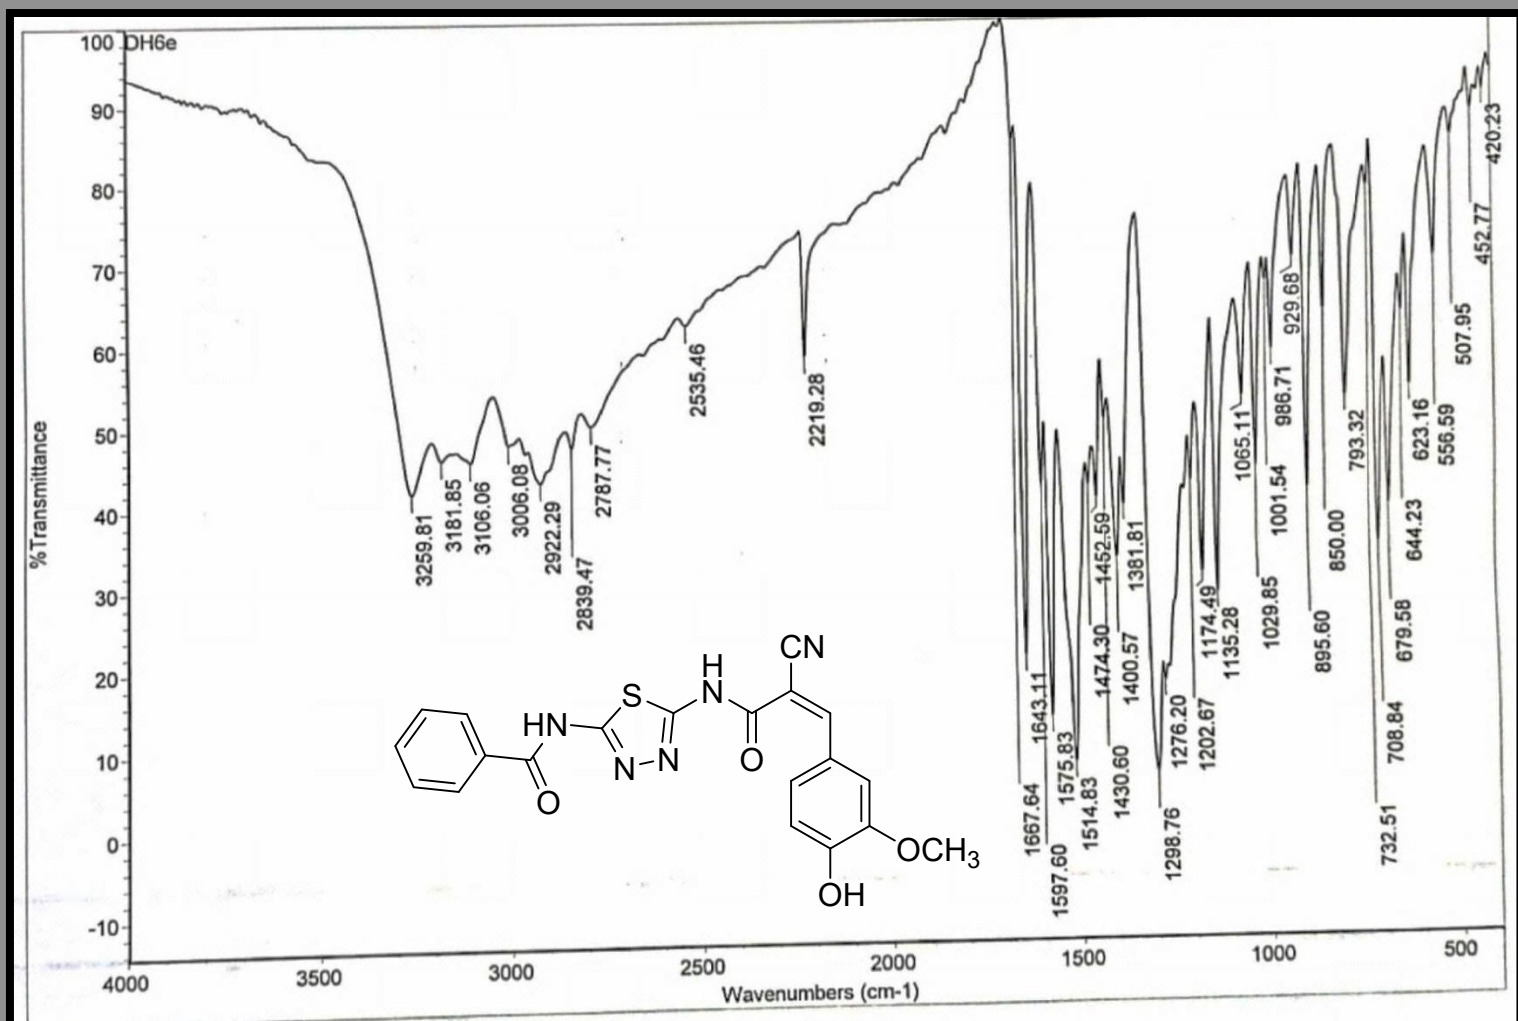

IR spectrum of compound 7f

Poula Soliman\_H\_DH6E

Microanalytical Unit - FOPCU - NMR laboratory  
www.pharma.cu.edu.eg dir-mau.fopcu@pharma.cu.edu.eg

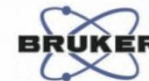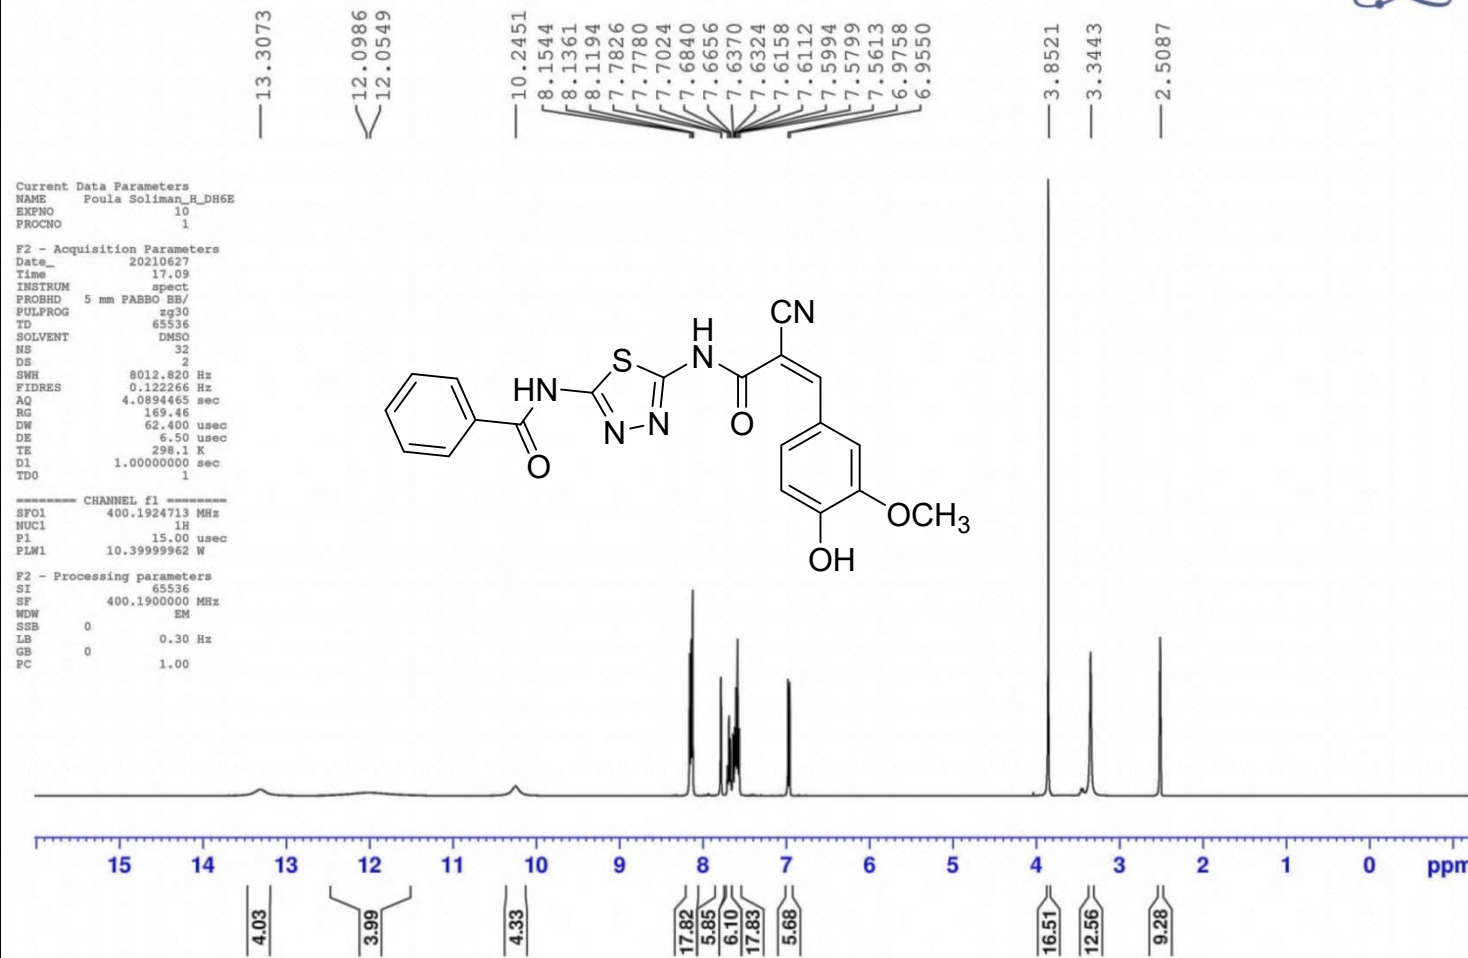

<sup>1</sup>H-NMR spectrum (DMSO-d<sub>6</sub>) of compound 7f

Poula Soliman\_H\_DH6E\_D2O

Microanalytical Unit - FOPCU - NMR laboratory  
www.pharma.cu.edu.eg dir-mau.fopcu@pharma.cu.edu.eg

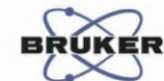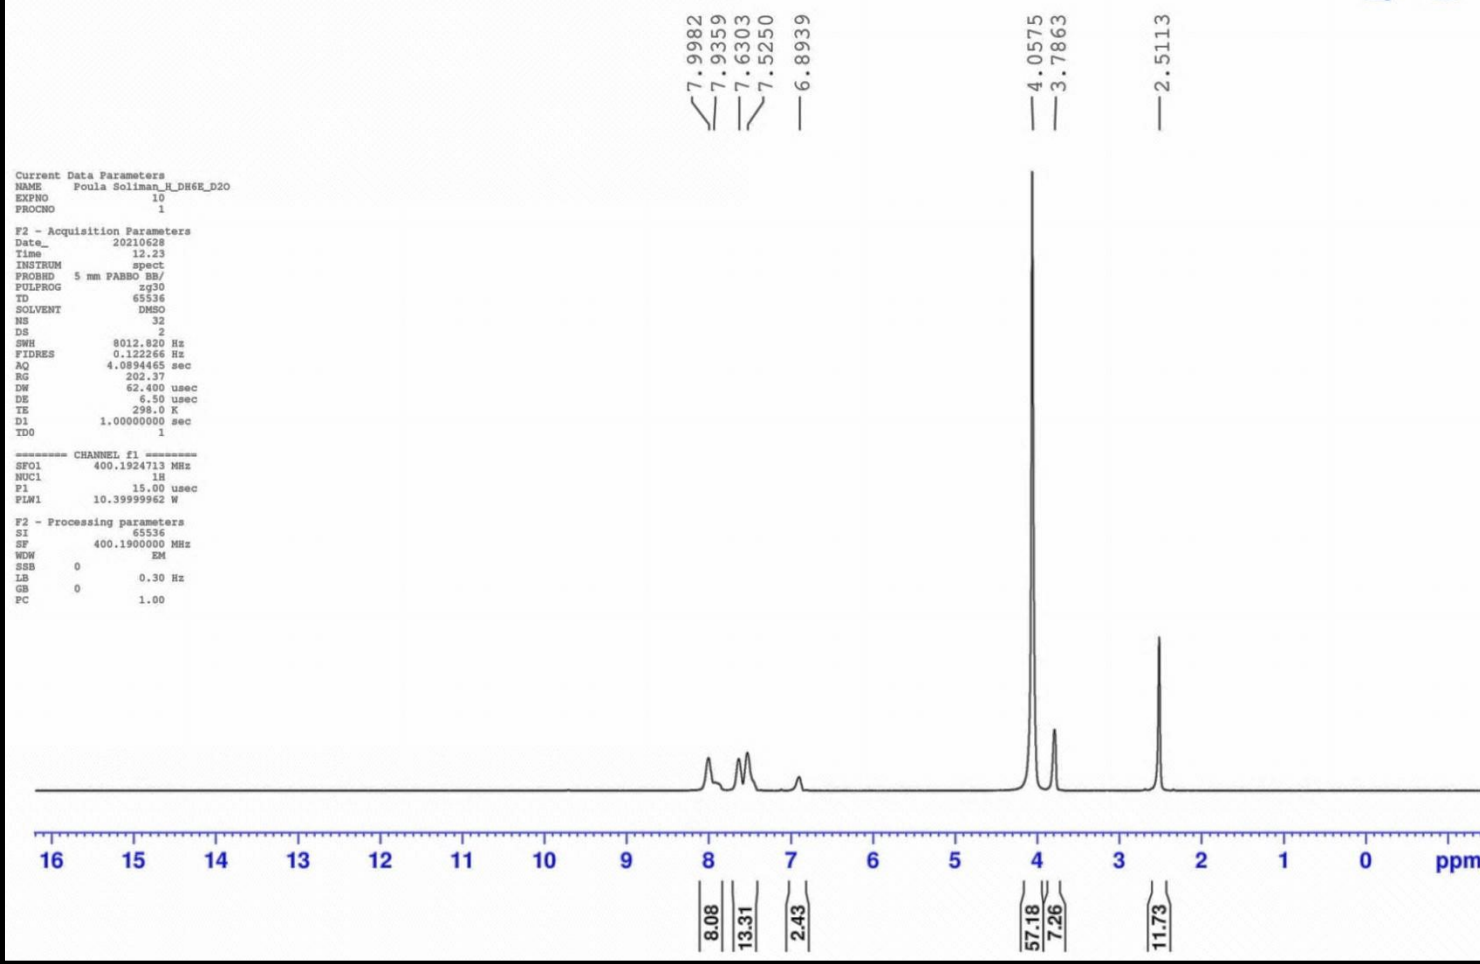

<sup>1</sup>H-NMR spectrum (DMSO-d<sub>6</sub>+ D<sub>2</sub>O) of compound 7f

Paula Soliman\_C\_DH6E

Microanalytical Unit - FOPCU - NMR laboratory  
www.pharma.cu.edu.eg dir-mau.fopcu@pharma.cu.edu.eg

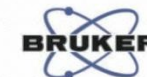

169.66  
168.85  
166.93  
159.51  
158.87  
152.45  
140.38  
134.43  
131.66  
129.98  
128.56  
126.08  
123.69  
123.33  
120.44  
117.41  
116.04  
68.92  
66.81  
65.73  
40.59  
40.38  
40.17  
39.96  
39.75  
39.55  
39.34

Current Data Parameters  
NAME Paula Soliman\_C\_DH6E  
EXPNO 10  
PROCNO 1

F2 - Acquisition Parameters  
Date\_ 20210628  
Time 10.45  
INSTRUM spect  
PROBHD 5 mm PABBO BB/  
PULPROG zgpg30  
TD 65536  
SOLVENT DMSO  
NS 1500  
DS 4  
SWH 24038.461 Hz  
FIDRES 0.366798 Hz  
AQ 1.3631488 sec  
RG 202.37  
DW 20.800 usec  
DE 6.50 usec  
TE 298.0 K  
D1 2.00000000 sec  
D11 0.03000000 sec  
TD0 1

----- CHANNEL f1 -----  
SF01 100.6379178 MHz  
NUC1 13C  
P1 10.00 usec  
PLW1 45.00000000 W  
----- CHANNEL f2 -----  
SFO2 400.1916008 MHz  
NUC2 1H  
CPDPRG[2] waltz16

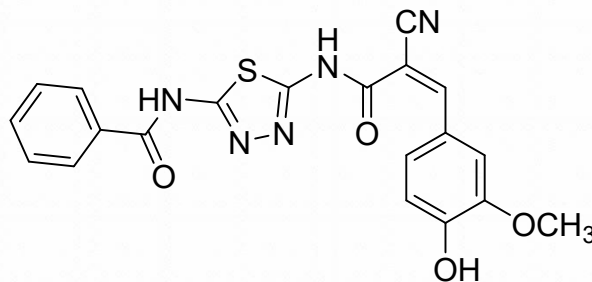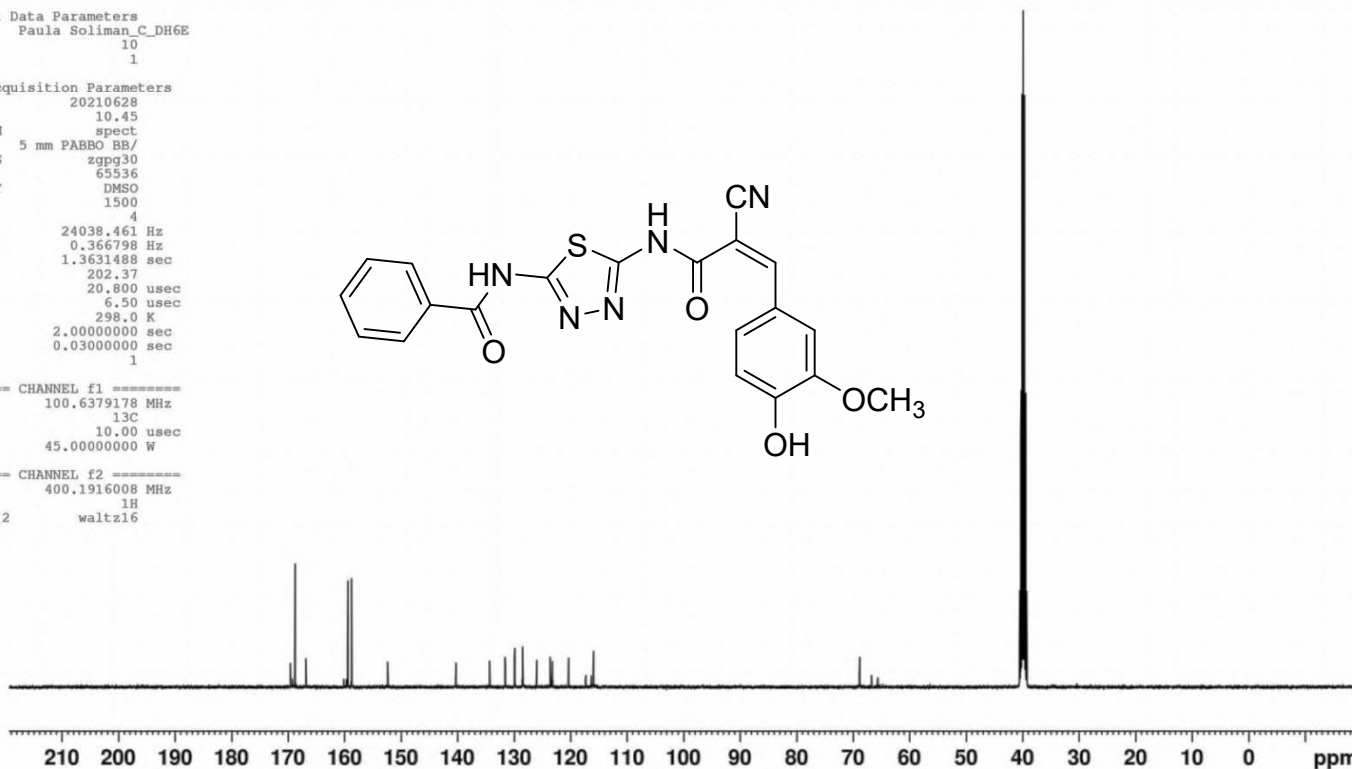

<sup>13</sup>C-NMR spectrum (DMSO-d<sub>6</sub>) of compound 7f

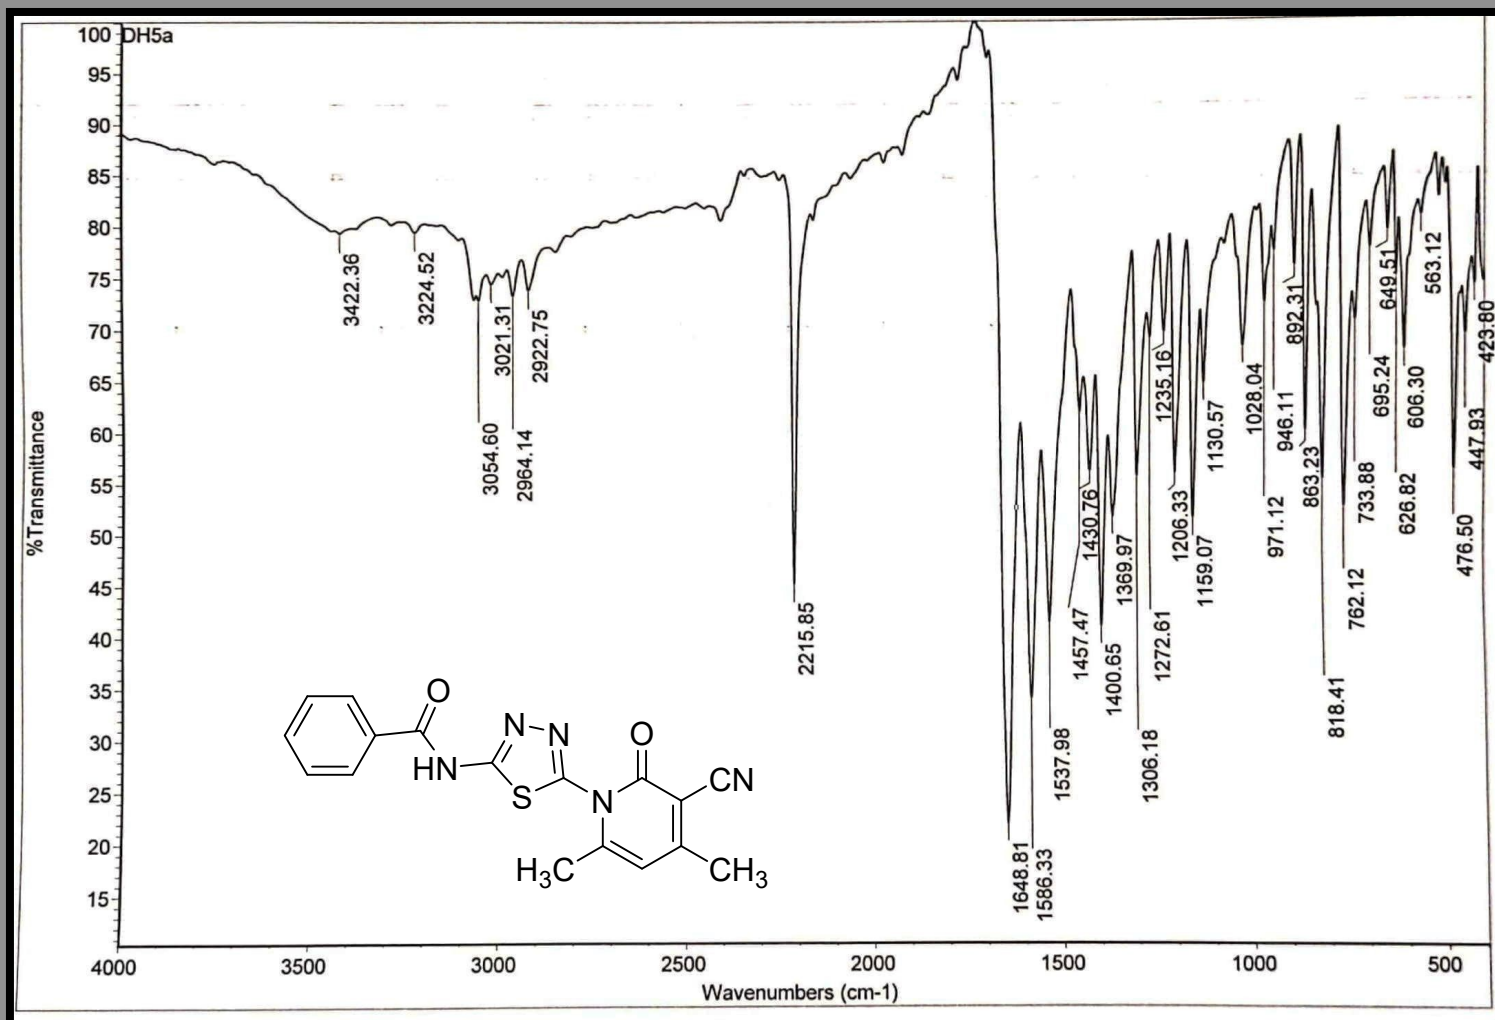

IR spectrum of compound 9

Paula Soliman\_H\_DH5a

Microanalytical Unit - FOPCU - NMR laboratory  
www.pharma.cu.edu.eg dir-mau.fopcu@pharma.cu.edu.eg

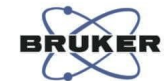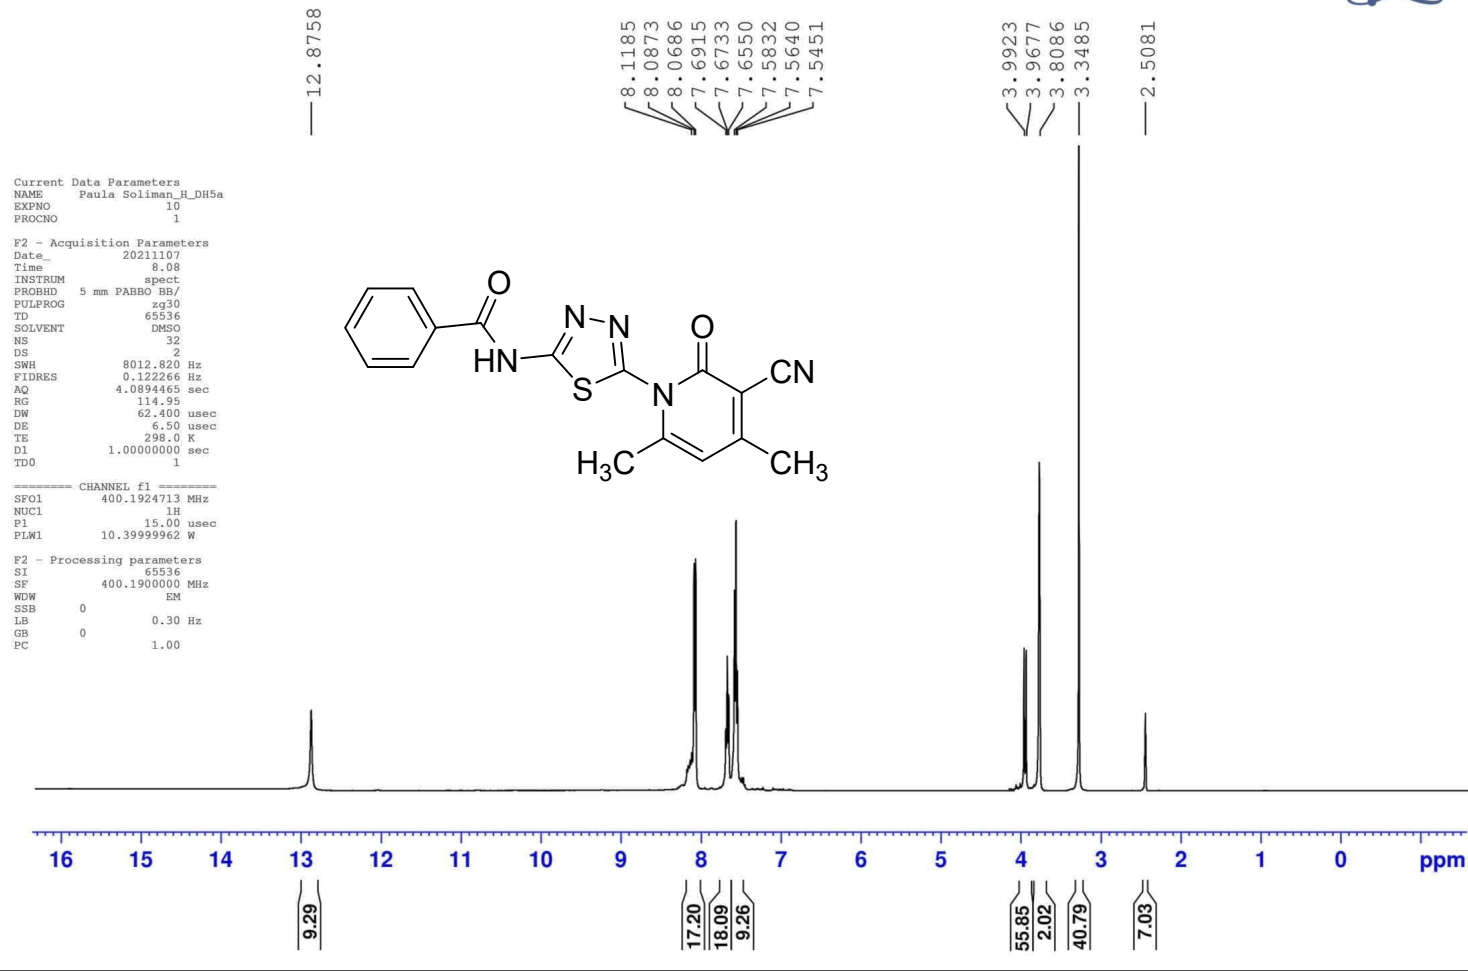

<sup>1</sup>H-NMR spectrum (DMSO-d<sub>6</sub>) of compound 9

Paula Soliman\_H\_DH5a\_D2O

Microanalytical Unit - FOPCU - NMR laboratory  
www.pharma.cu.edu.eg dir-mau.fopcu@pharma.cu.edu.eg

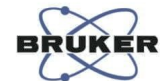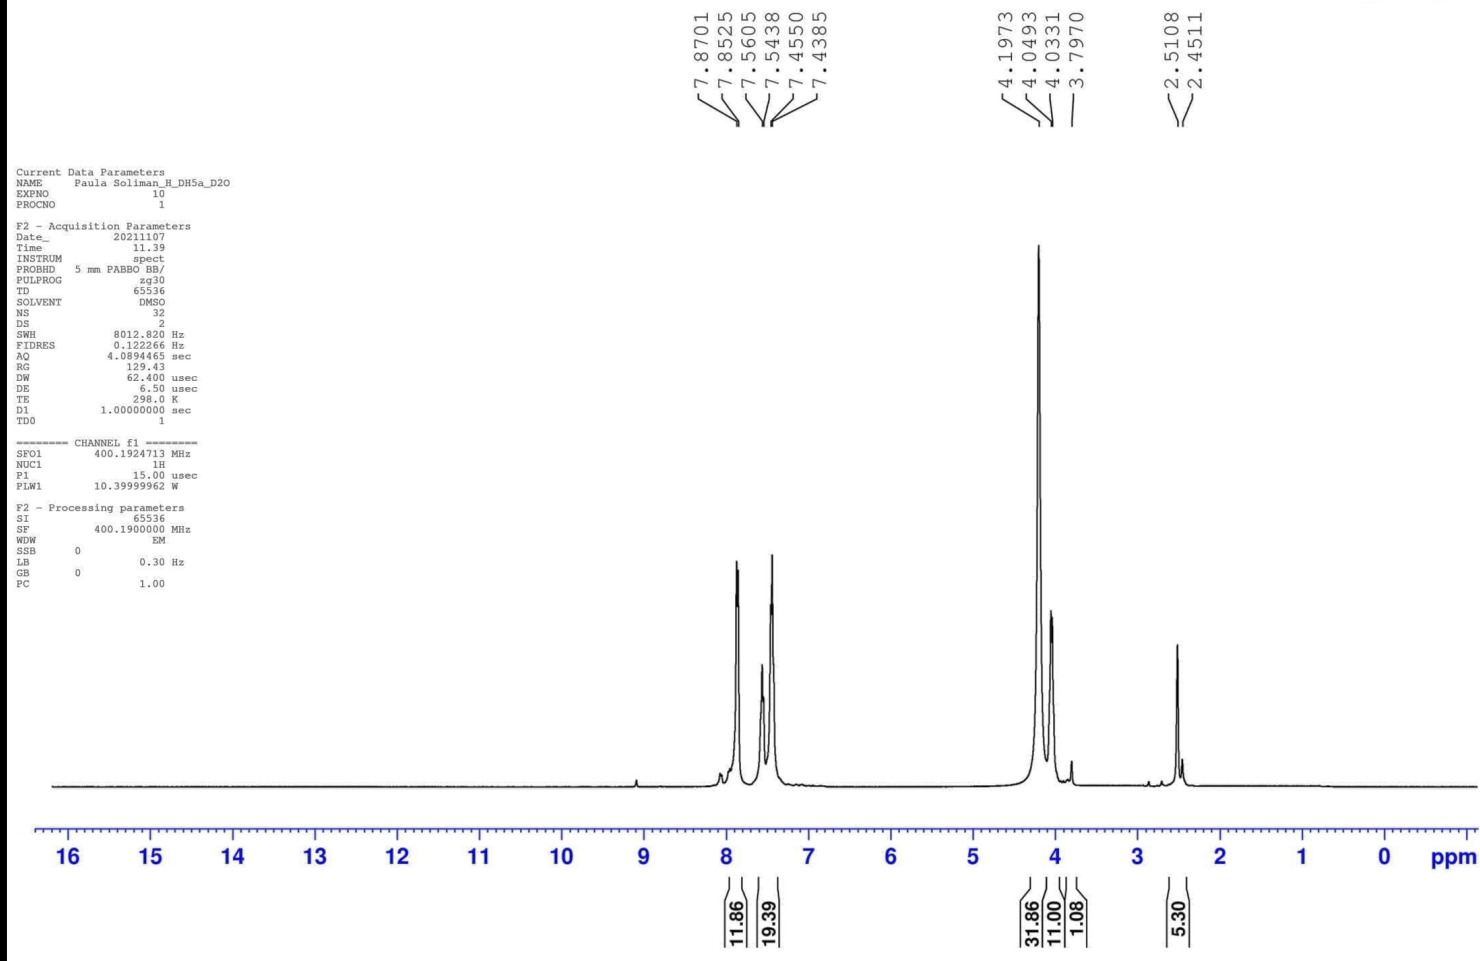

$^1\text{H-NMR}$  spectrum (DMSO- $d_6$ +  $\text{D}_2\text{O}$ ) of compound **9**

Paula Soliman\_C\_DH5a

Microanalytical Unit - FOPCU - NMR laboratory  
www.pharma.cu.edu.eg dir-mau.fopcu@pharma.cu.edu.eg

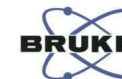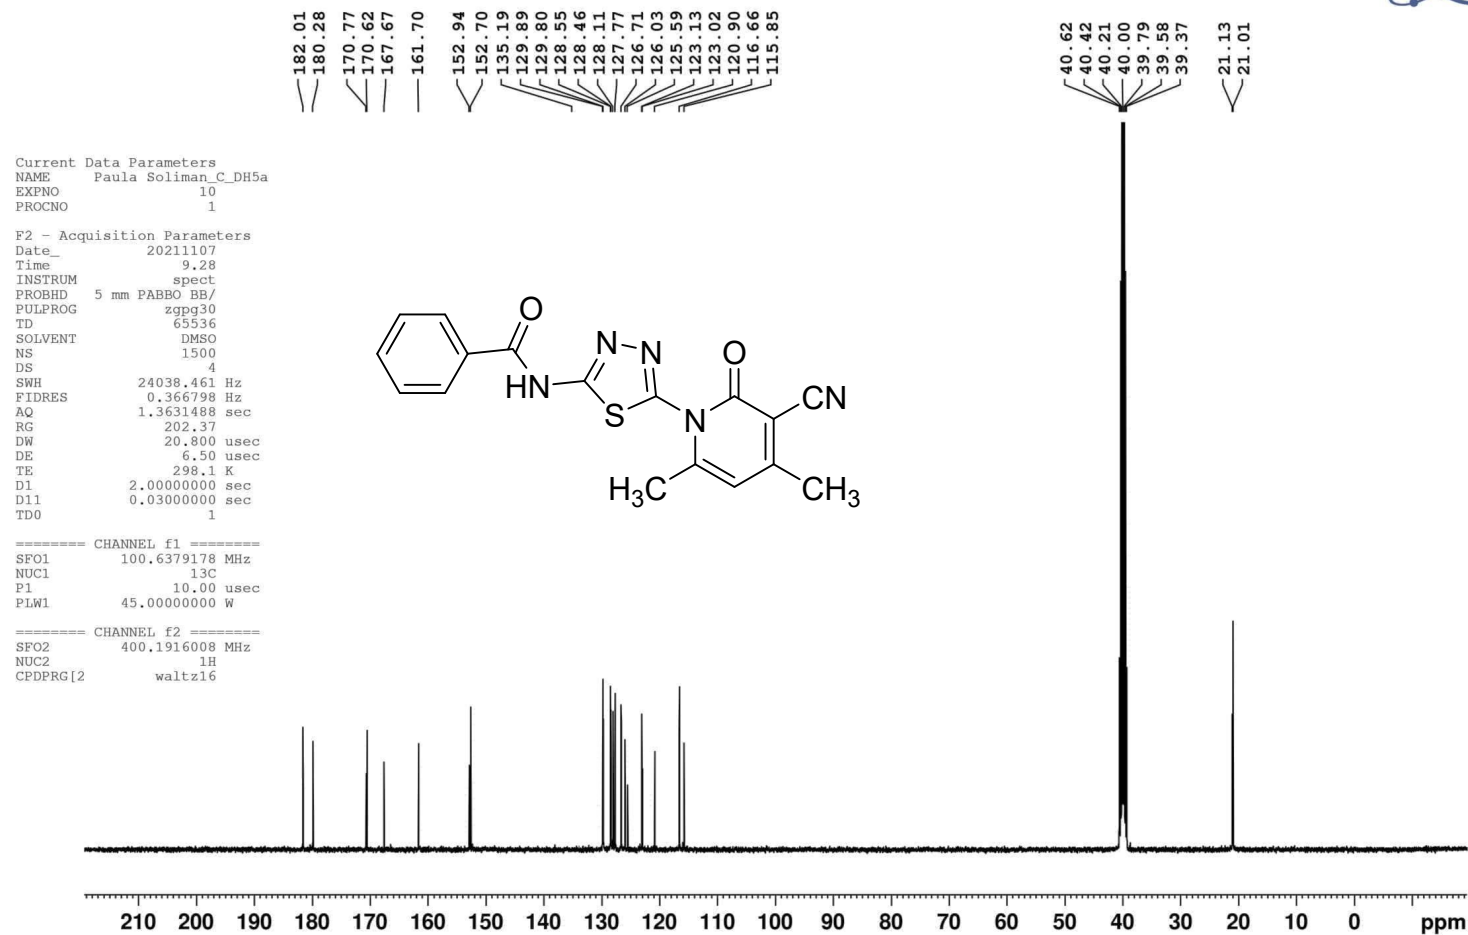

$^{13}\text{C}$ -NMR spectrum (DMSO- $d_6$ ) of compound 9



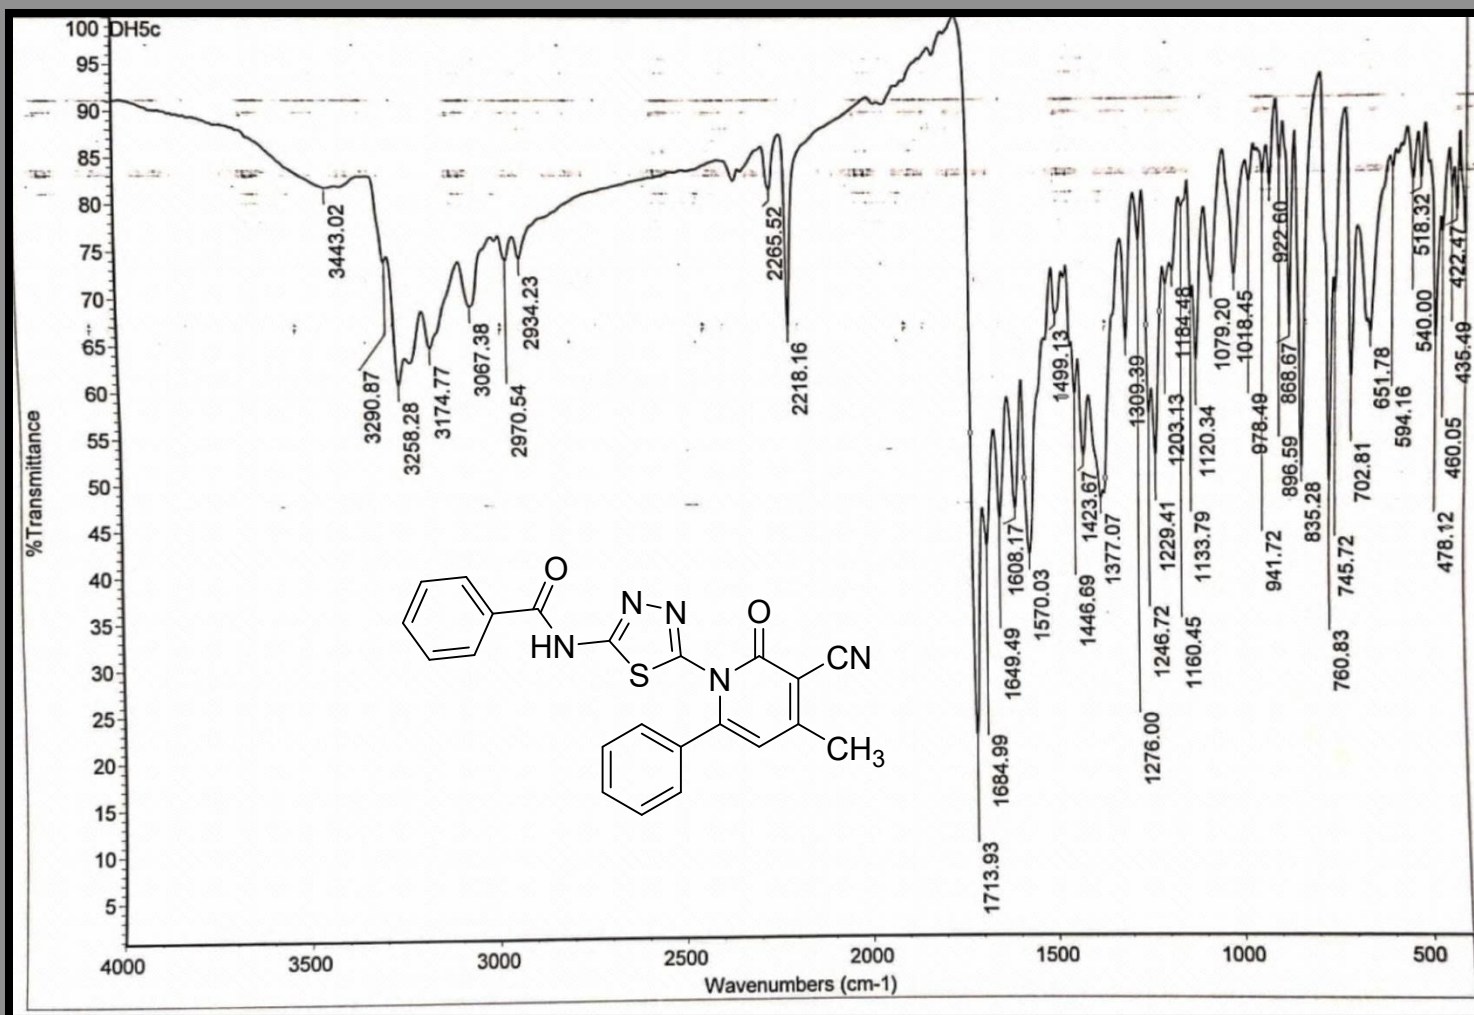

IR spectrum of compound 10

Paula Soliman\_H\_DH5C

Microanalytical Unit - FOPCU - NMR laboratory  
www.pharma.cu.edu.eg dir-mau.fopcu@pharma.cu.edu.eg

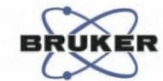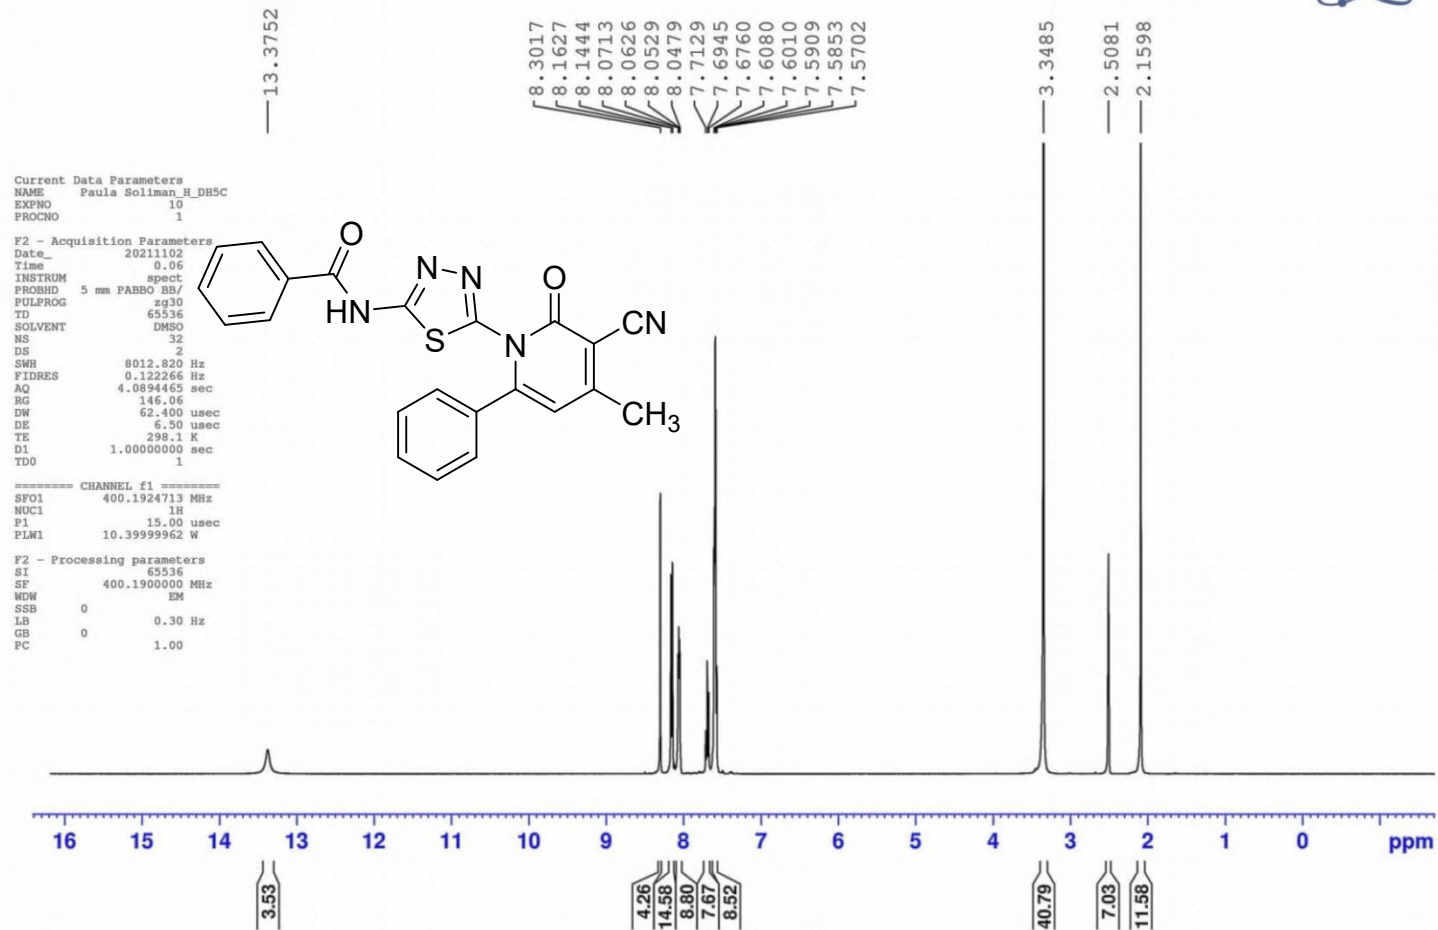

<sup>1</sup>H-NMR spectrum (DMSO-d<sub>6</sub>) of compound 10

Paula Soliman\_H\_DH5C\_D2O

Microanalytical Unit - FOPCU - NMR laboratory  
www.pharma.cu.edu.eg dir-mau.fopcu@pharma.cu.edu.eg

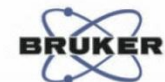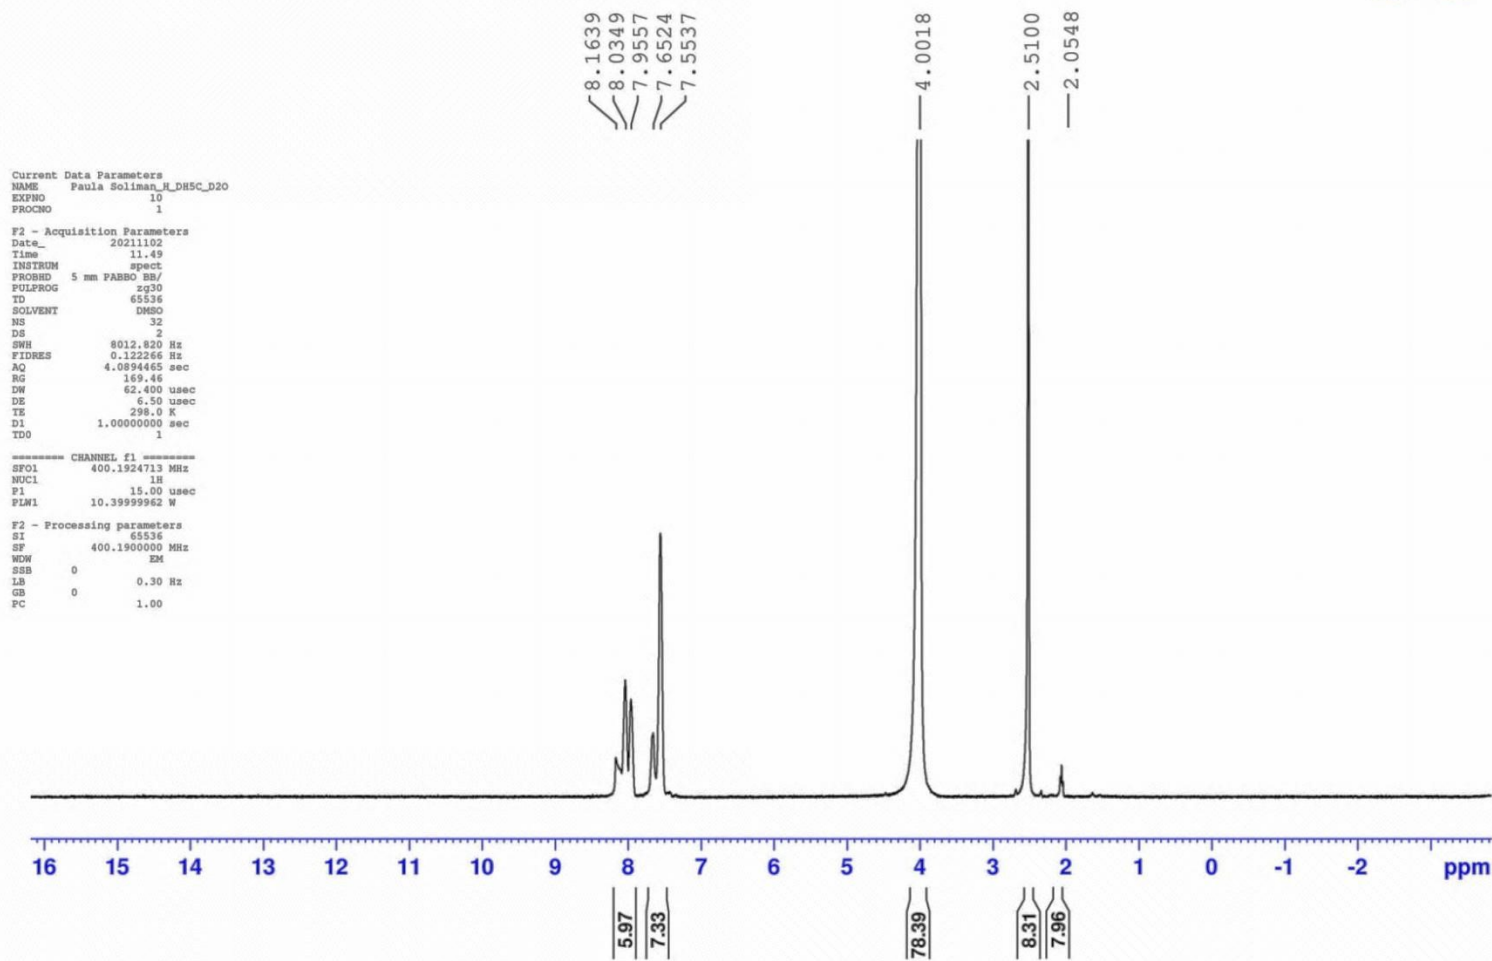

$^1\text{H-NMR}$  spectrum ( $\text{DMSO-d}_6 + \text{D}_2\text{O}$ ) of compound **10**

Paula Soliman\_C\_DH5C

Microanalytical Unit - FOPCU - NMR laboratory  
www.pharma.cu.edu.eg dir-mau.fopcu@pharma.cu.edu.eg

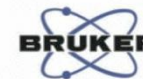

169.66  
168.85  
166.93  
159.51  
158.87  
152.45  
140.38  
134.43  
131.66  
129.98  
128.56  
126.08  
123.69  
123.33  
120.44  
117.41  
116.04

68.92

40.59  
40.38  
40.17  
39.96  
39.75  
39.55  
39.34  
22.83

Current Data Parameters  
NAME Paula Soliman\_C\_DH5C  
EXPNO 10  
PROCNO 1

F2 - Acquisition Parameters  
Date\_ 20211102  
Time 13.45  
INSTRUM spect  
PROBHD 5 mm PABBO BB/  
PULPROG zgpg30  
TD 65536  
SOLVENT DMSO  
NS 1500  
DS 4  
SWH 24038.461 Hz  
FIDRES 0.366798 Hz  
AQ 1.3631488 sec  
RG 202.37  
DW 20.800 usec  
DE 6.50 usec  
TE 298.0 K  
D1 2.00000000 sec  
D11 0.03000000 sec  
TD0 1

----- CHANNEL f1 -----  
SFO1 100.6379178 MHz  
NUC1 13C  
P1 10.00 usec  
PLW1 45.00000000 W

----- CHANNEL f2 -----  
SFO2 400.1916008 MHz  
NUC2 1H  
CPDPRG2 waltz16

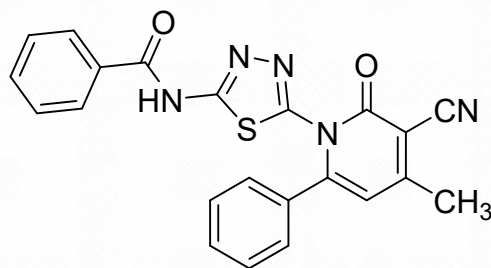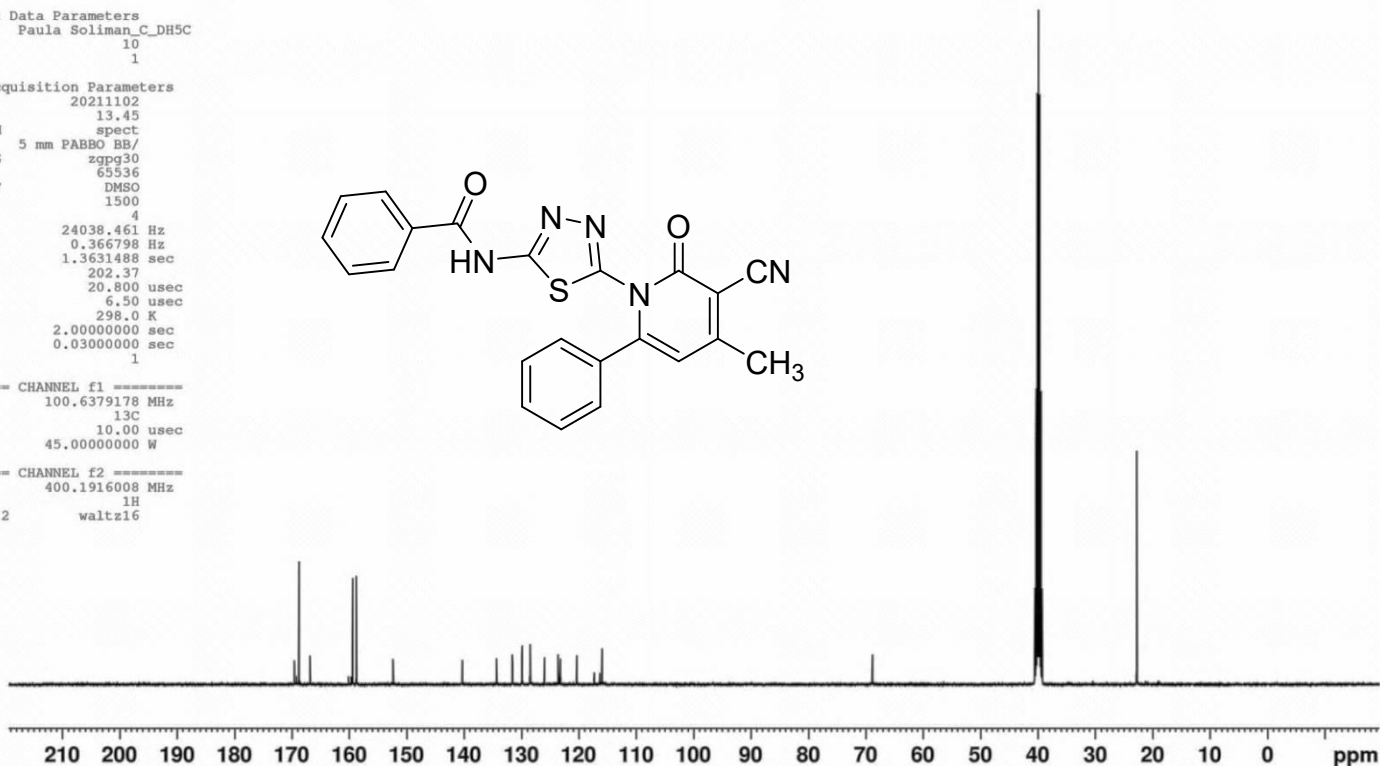

<sup>13</sup>C-NMR spectrum (DMSO-d<sub>6</sub>) of compound 10

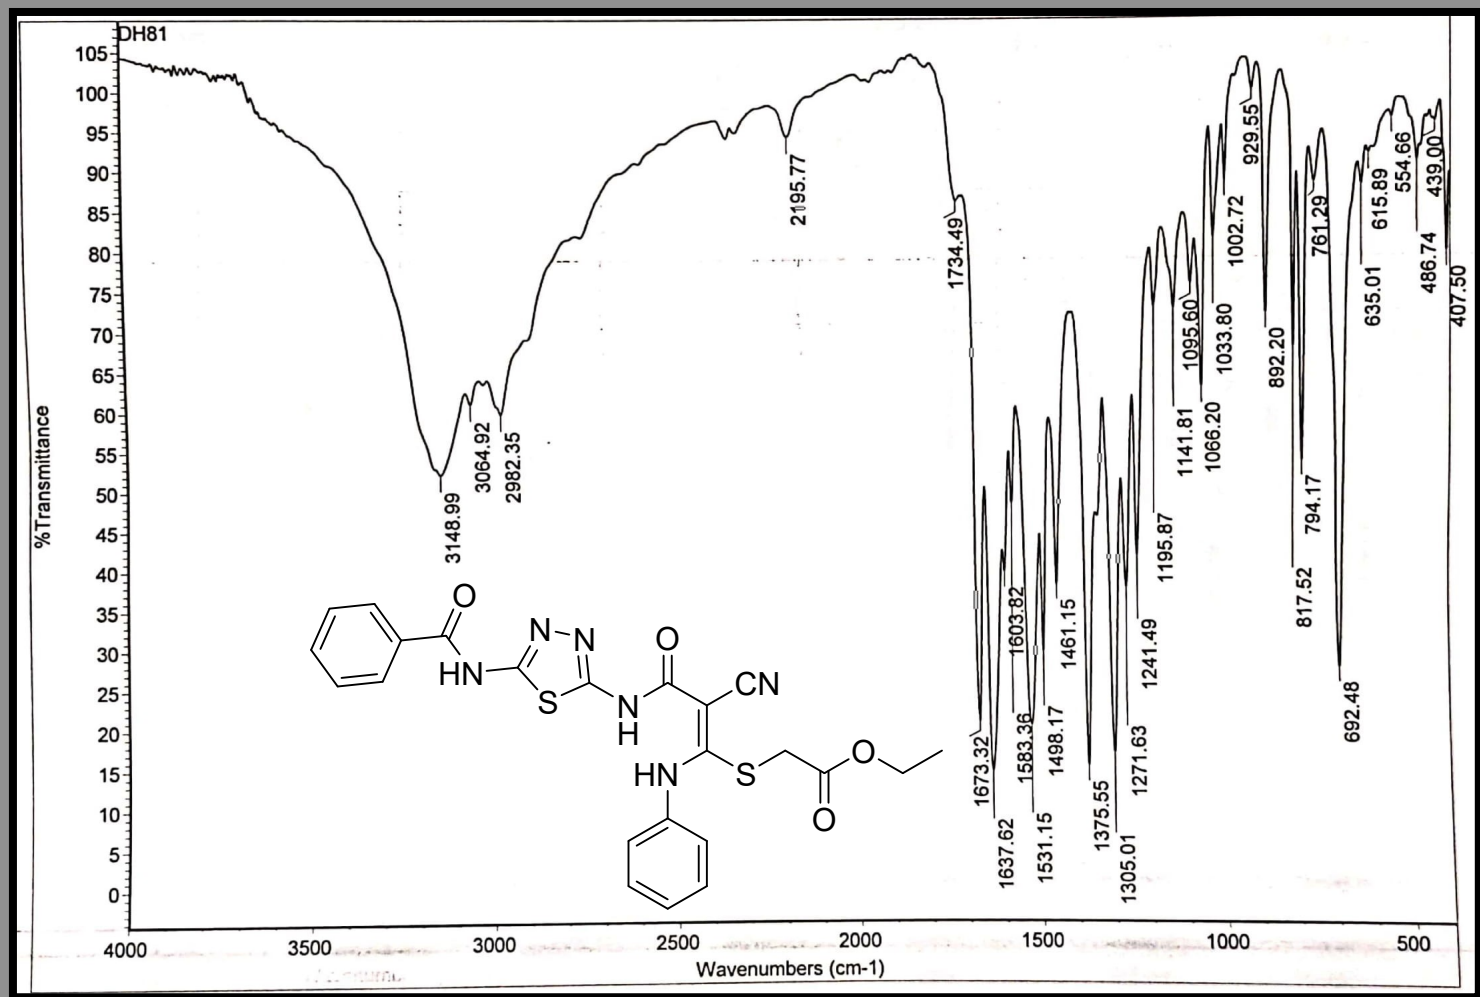

IR spectrum of compound 11

Paula Soliman\_H\_DH81

Microanalytical Unit - FOPCU - NMR laboratory  
www.pharma.cu.edu.eg dir-mau.fopcu@pharma.cu.edu.eg

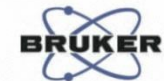

13.0754  
12.8515  
11.9696

8.0778  
8.0554  
8.0440  
7.7758  
7.7674  
7.7350  
7.7264  
7.6786  
7.6698  
6.7743  
6.7693  
6.7651  
6.7613  
6.7561  
4.5966  
4.3781  
4.2372  
4.2109  
4.1936  
4.1399  
4.1225  
4.1047  
4.0873  
4.0687  
4.0542  
3.7586  
2.5080  
1.2569  
1.2391  
1.2274  
1.2098  
1.1922  
1.1759  
1.1575  
1.1401  
1.1246  
1.1069

Current Data Parameters  
NAME Paula Soliman\_H\_DH81  
EXPNO 21  
PROCNO 1

F2 - Acquisition Parameters  
Date\_ 20211102  
Time 0.01  
INSTRUM spect  
PROBHD 5 mm PABBO BB/  
PULPROG zg30  
TD 65536  
SOLVENT DMSO  
NS 32  
DS 2  
SWH 8012.820 Hz  
FIDRES 0.122266 Hz  
AQ 4.0894465 sec  
RG 146.06  
DW 62.400 usec  
DE 6.50 usec  
TE 298.0 K  
D1 1.00000000 sec  
TDO 1

==== CHANNEL f1 =====  
SFO1 400.1924713 MHz  
NUC1 1H  
P1 15.00 usec  
PLW1 10.39999962 W

F2 - Processing parameters  
SI 65536  
SF 400.1900000 MHz  
WDW EM  
SSB 0  
LB 0.30 Hz  
GB 0  
PC 1.00

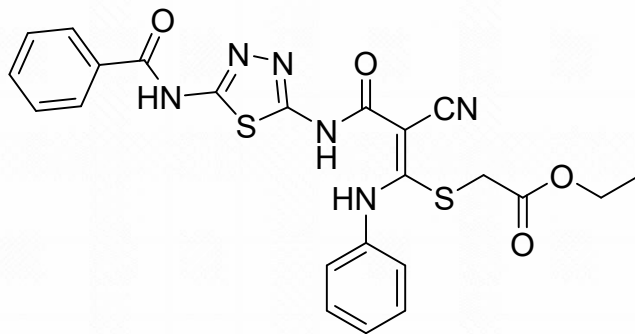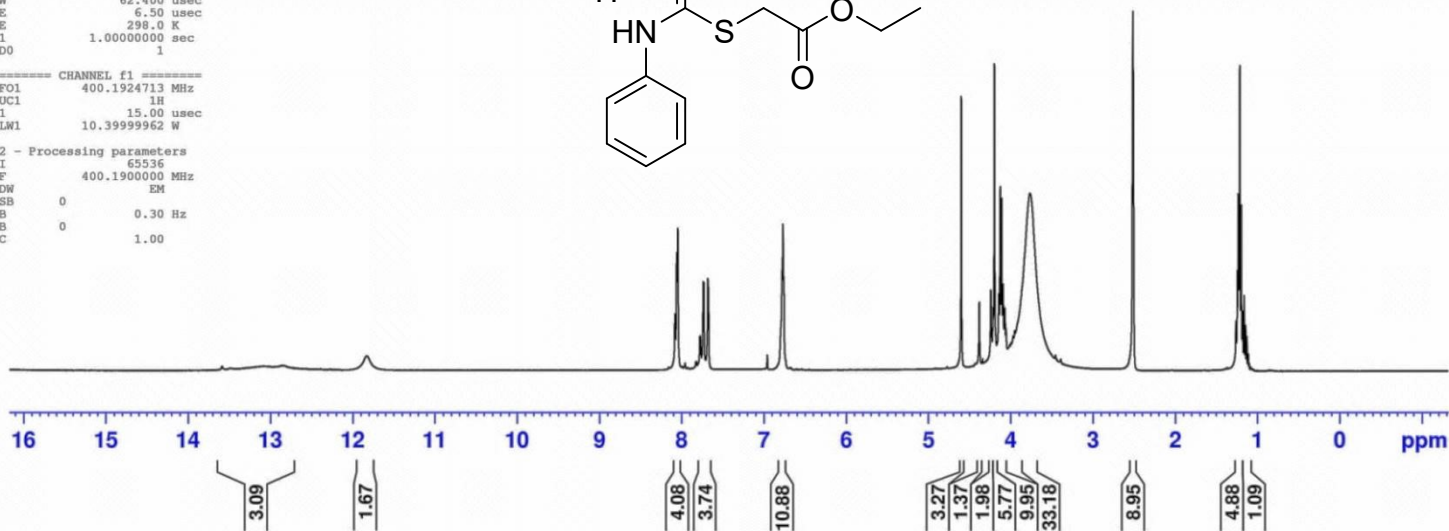

<sup>1</sup>H-NMR spectrum (DMSO-d<sub>6</sub>) of compound **11**

Paula Soliman\_H\_DH81\_D2O

Microanalytical Unit - FOPCU - NMR laboratory  
www.pharma.cu.edu.eg dir-mau.fopcu@pharma.cu.edu.eg

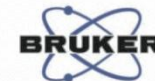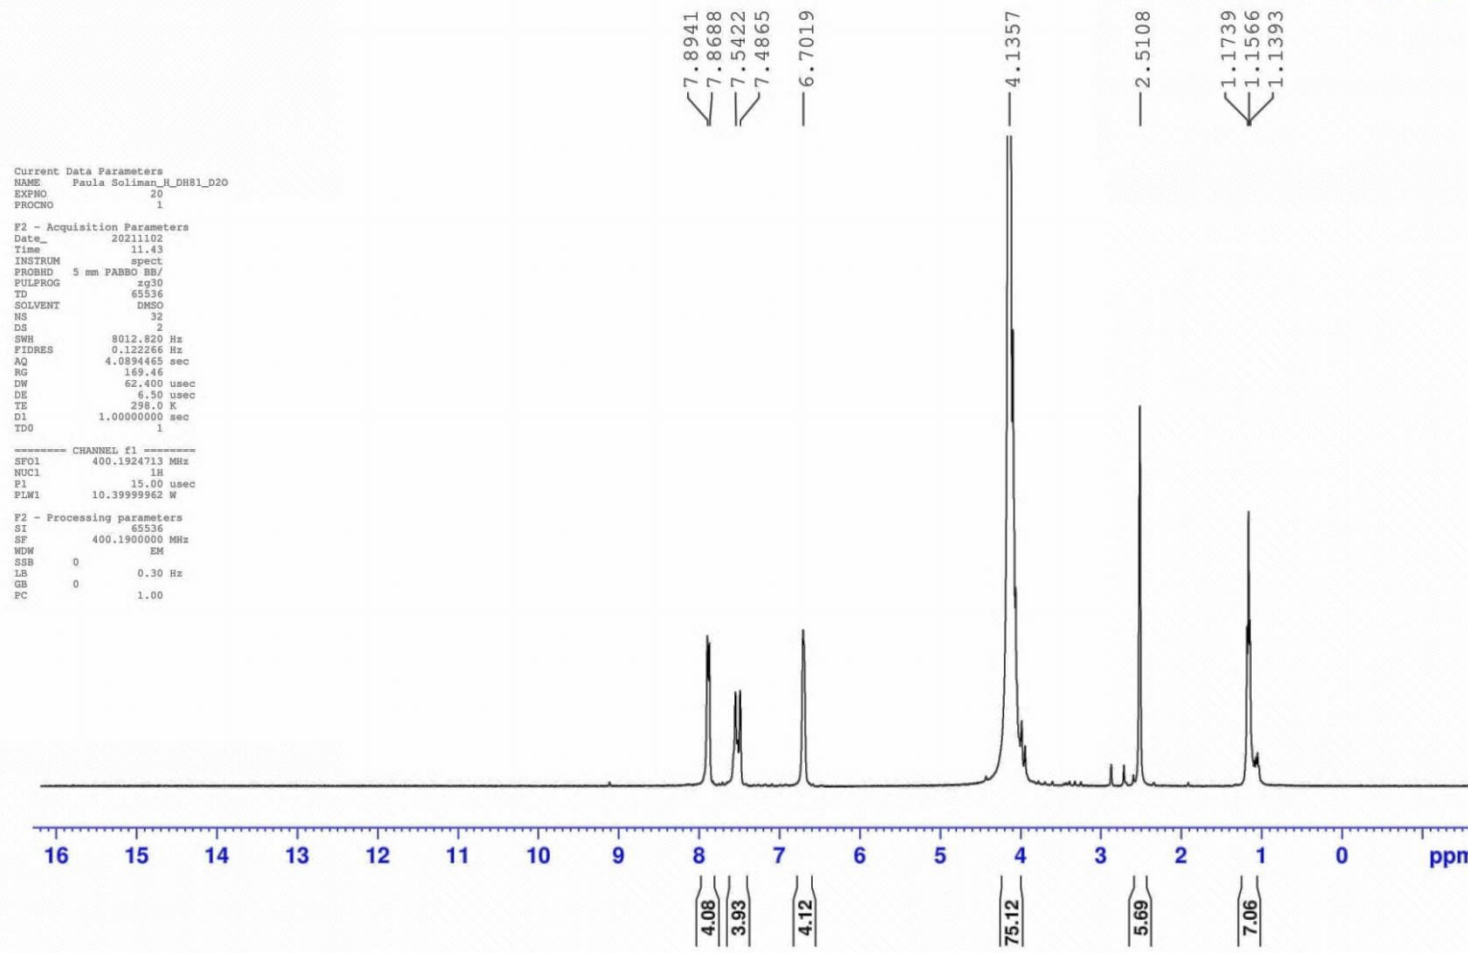

$^1\text{H}$ -NMR spectrum ( $\text{DMSO-d}_6 + \text{D}_2\text{O}$ ) of compound **11**

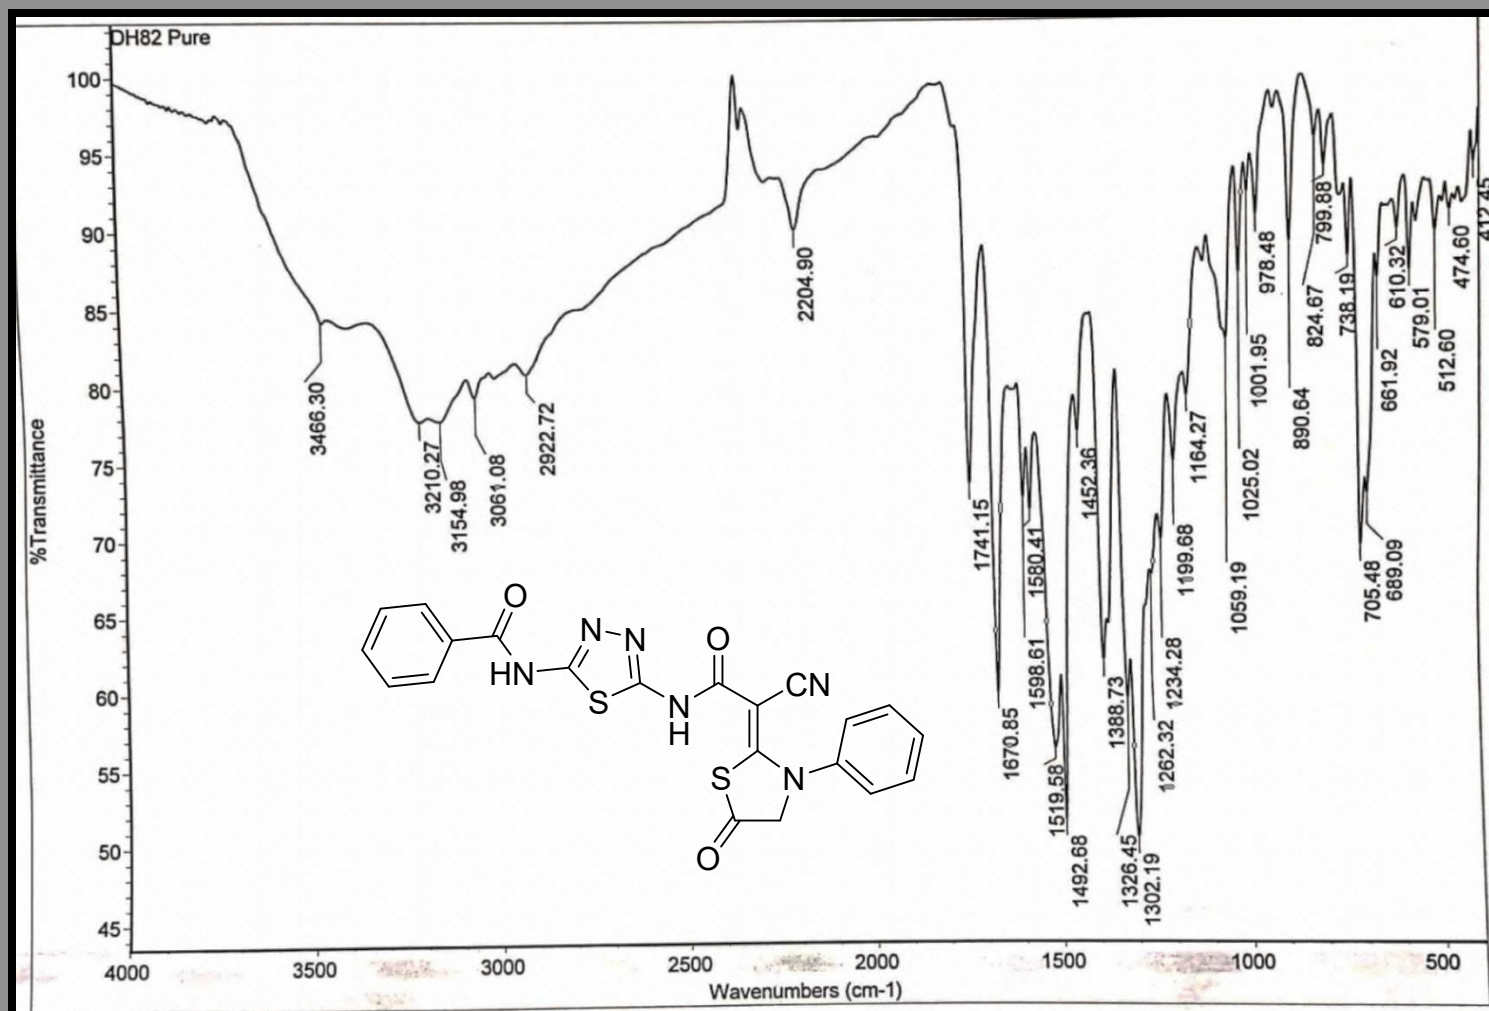

IR spectrum of compound 12



Paula Soliman\_H\_DH82

Microanalytical Unit - FOPCU - NMR laboratory  
www.pharma.cu.edu.eg dir-mau.fopcu@pharma.cu.edu.eg

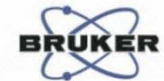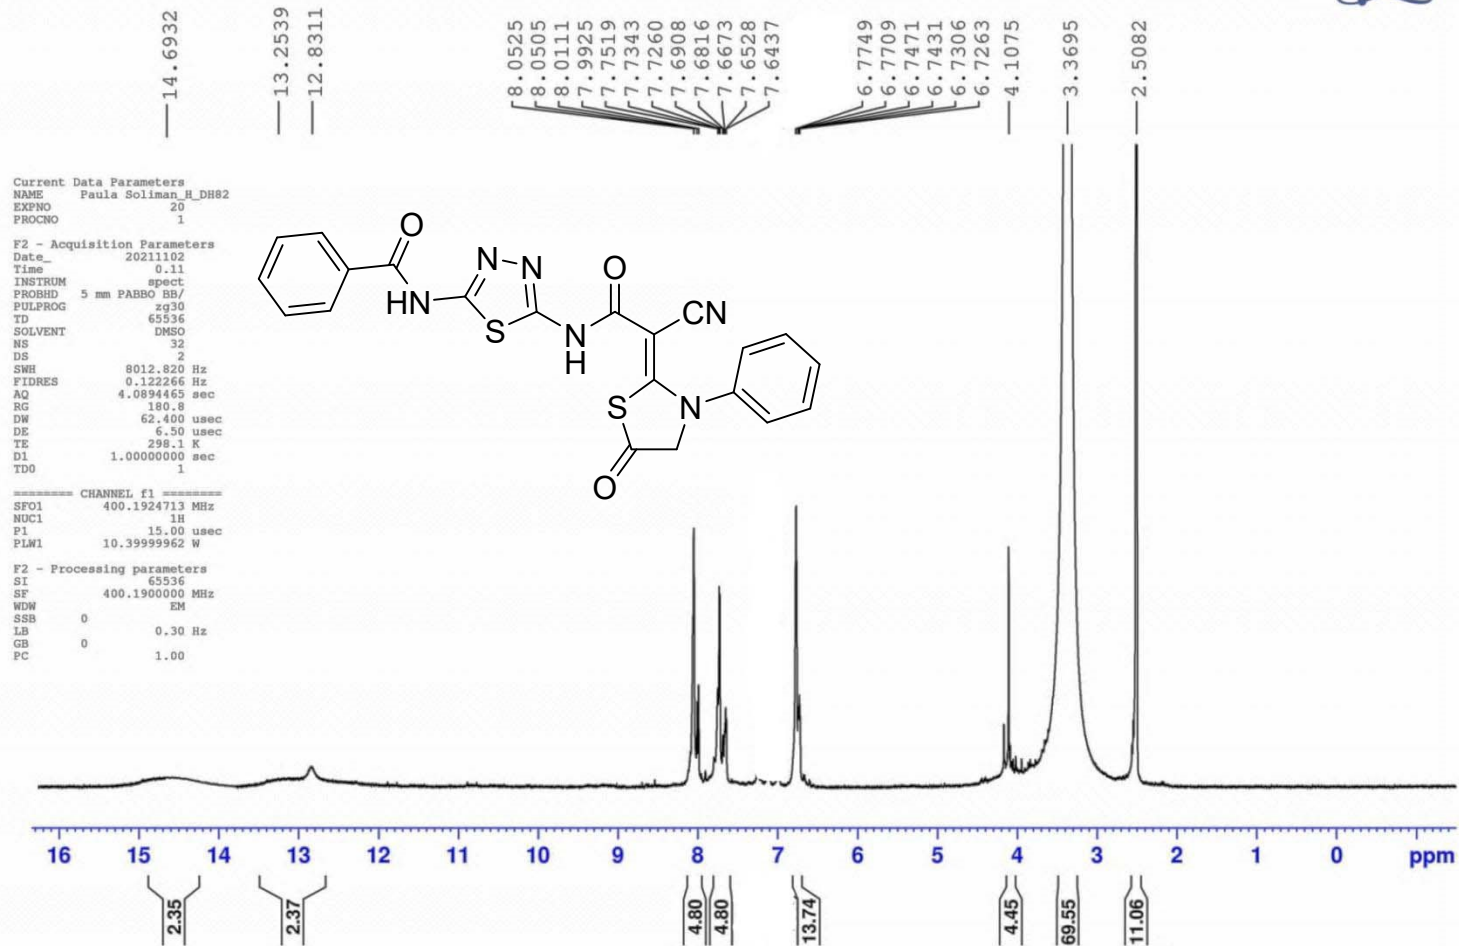

$^1\text{H-NMR}$  spectrum (DMSO- $d_6$ ) of compound 12

Paula Soliman\_H\_DH82\_D2O

Microanalytical Unit - FOPCU - NMR laboratory  
www.pharma.cu.edu.eg dir-mau.fopcu@pharma.cu.edu.eg

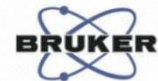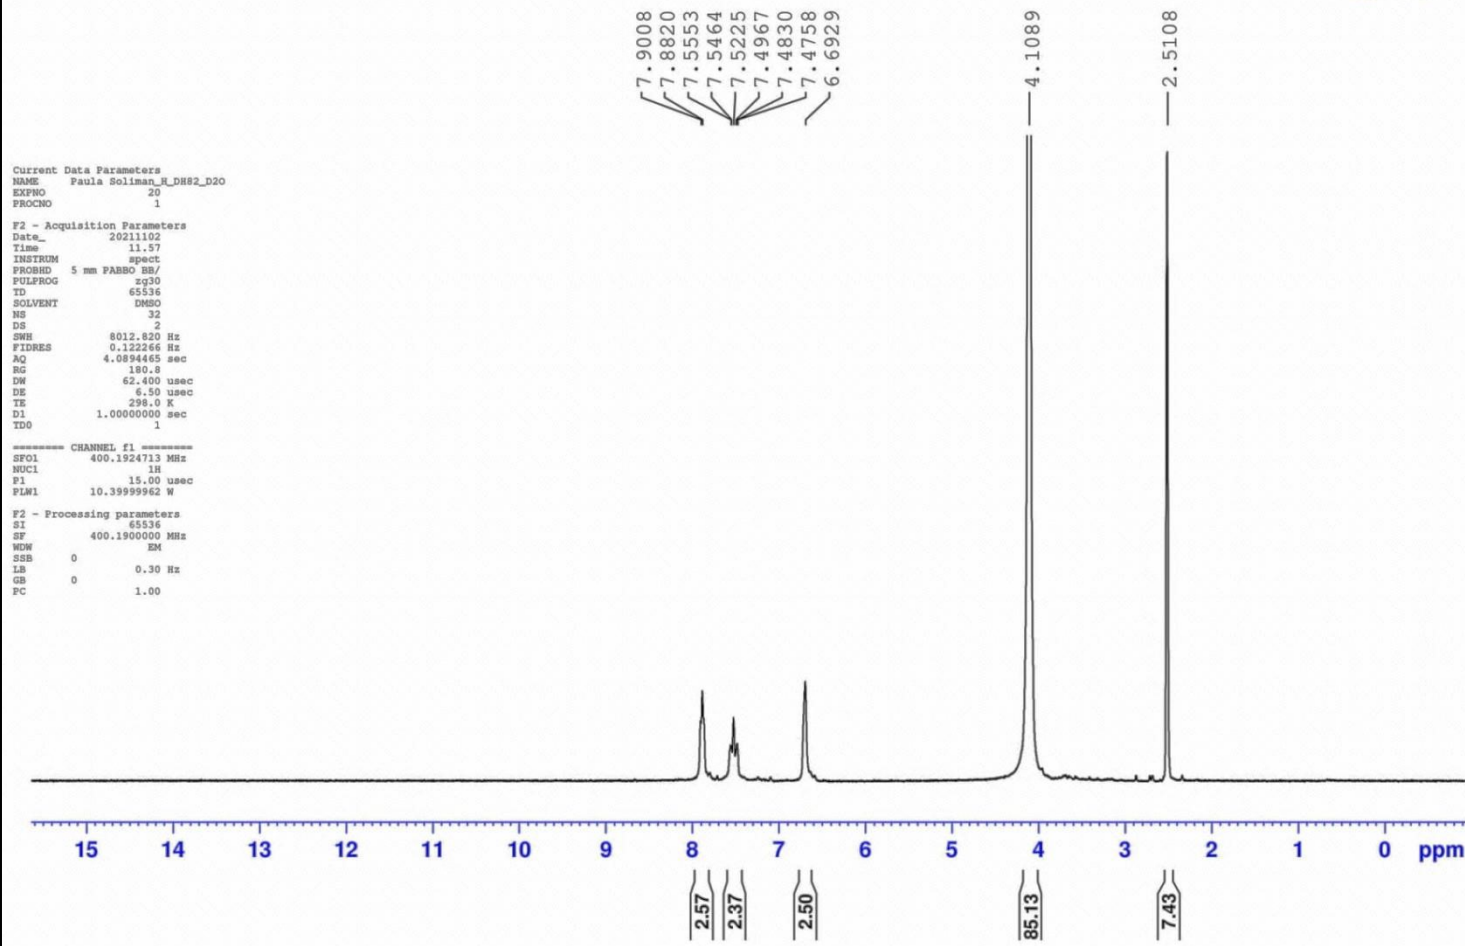

$^1\text{H-NMR}$  spectrum ( $\text{DMSO-d}_6 + \text{D}_2\text{O}$ ) of compound **12**

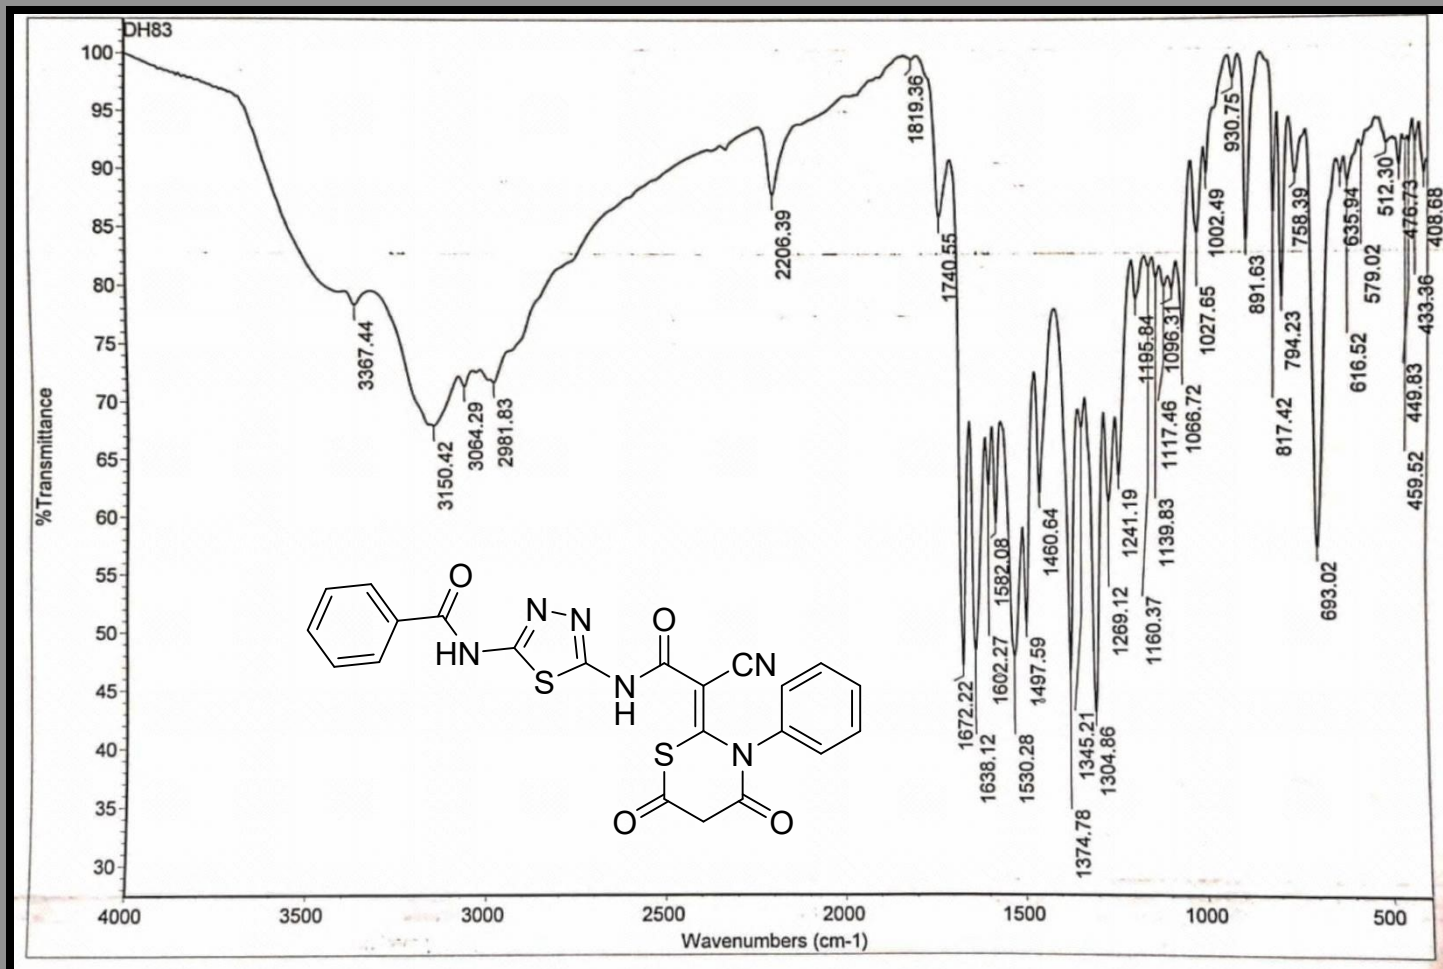

IR spectrum of compound 13

Paula Soliman\_H\_DH83

Microanalytical Unit - FOPCU - NMR laboratory  
www.pharma.cu.edu.eg dir-mau.fopcu@pharma.cu.edu.eg

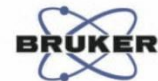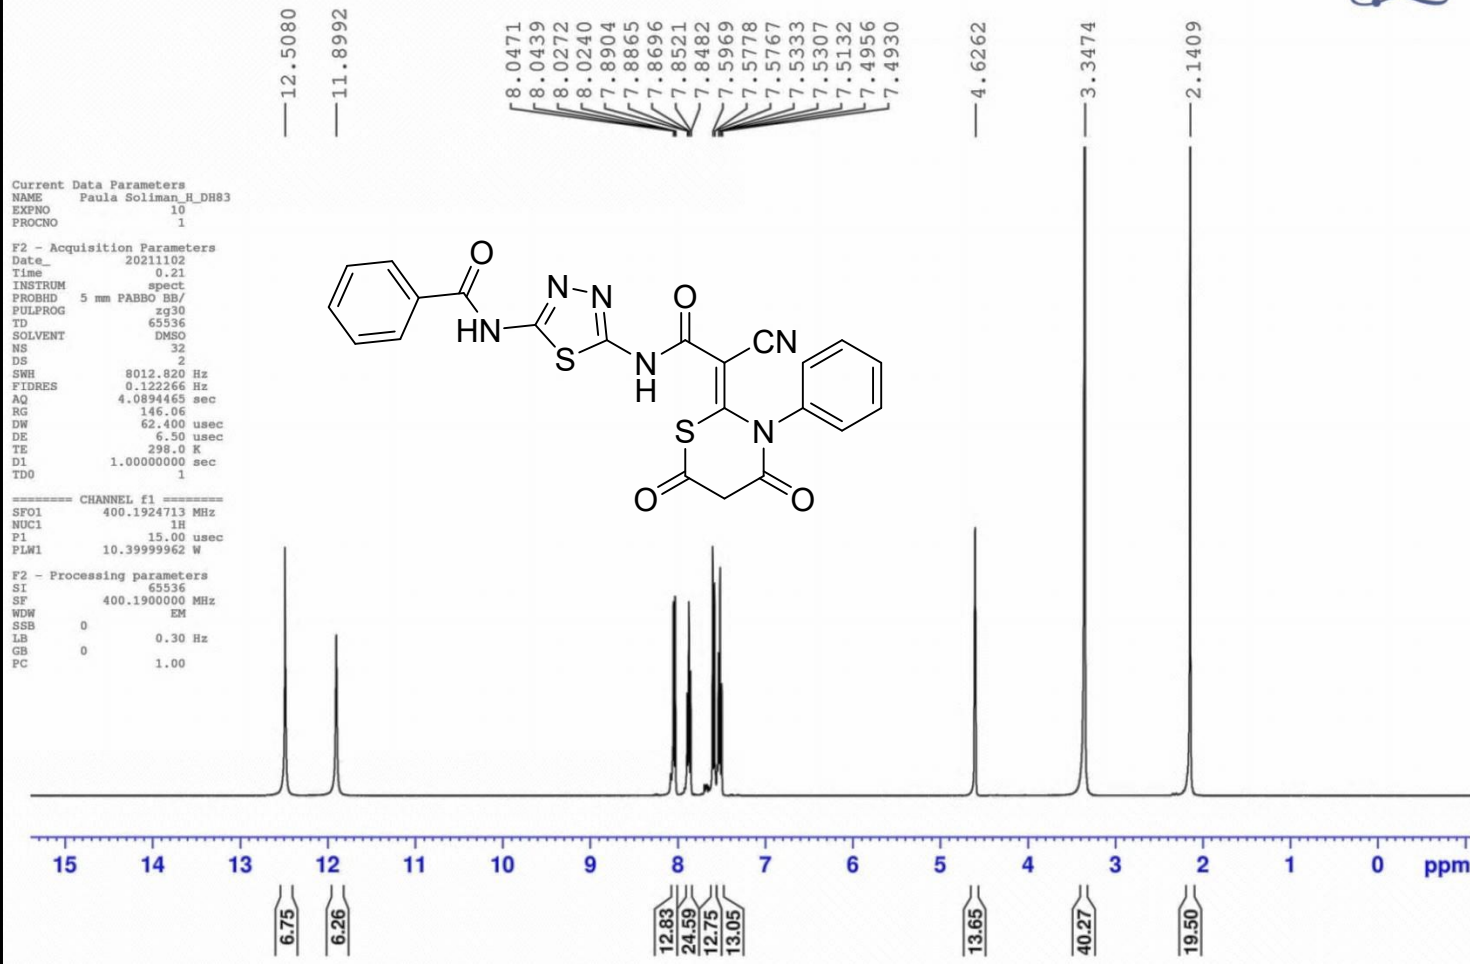

<sup>1</sup>H-NMR spectrum (DMSO-d<sub>6</sub>) of compound 13

Paula Soliman\_H\_DH83\_D2O

Microanalytical Unit - FOPCU - NMR laboratory  
www.pharma.cu.edu.eg dir-mau.fopcu@pharma.cu.edu.eg

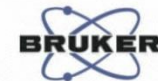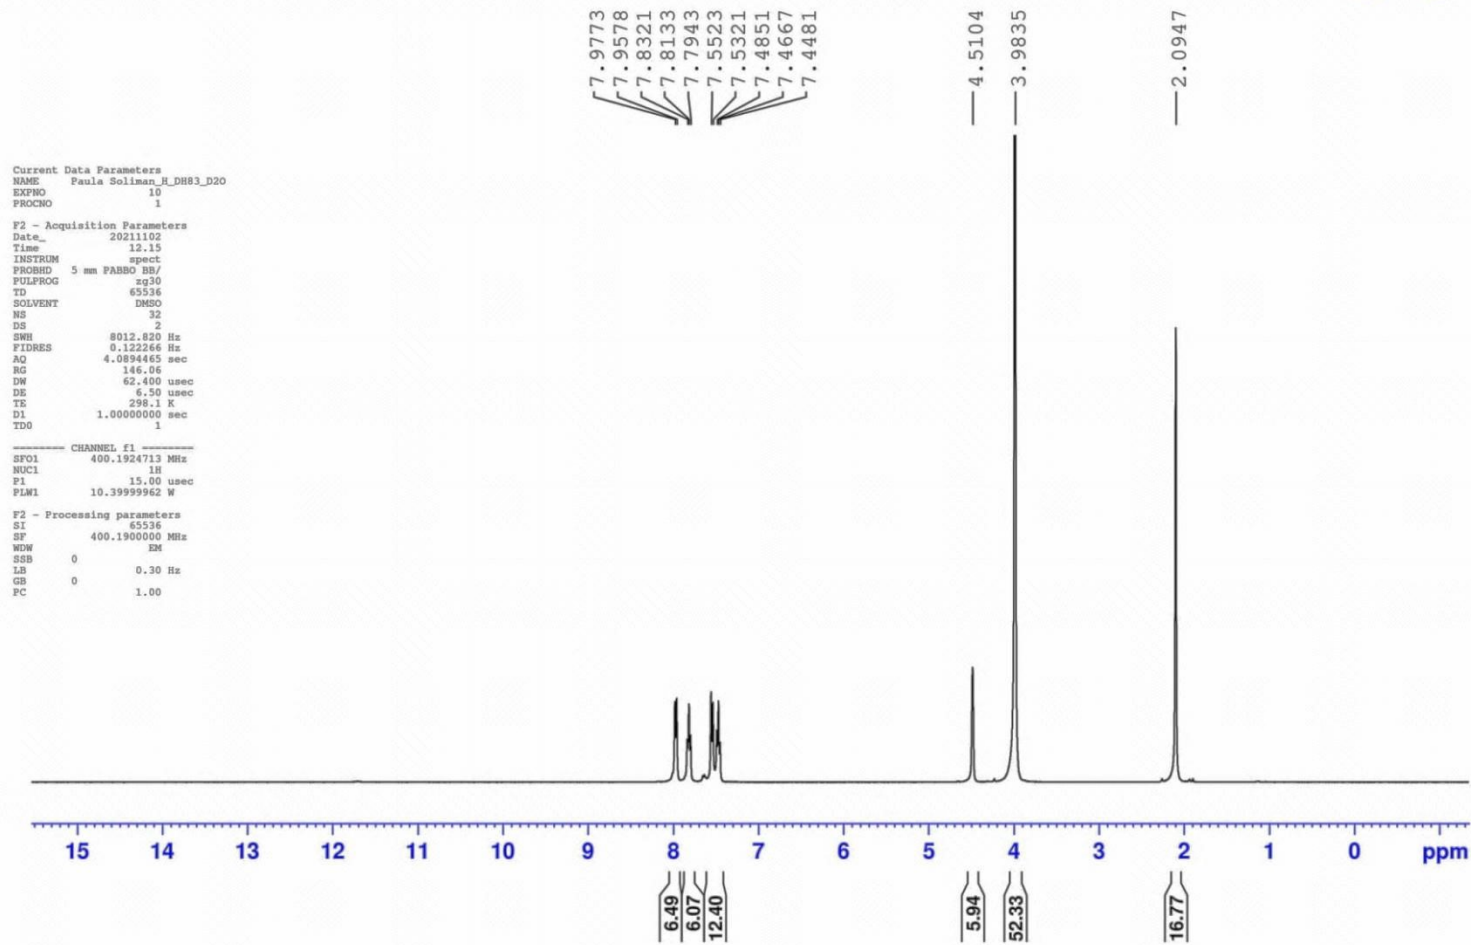

<sup>1</sup>H-NMR spectrum (DMSO-d<sub>6</sub>+ D<sub>2</sub>O) of compound 13

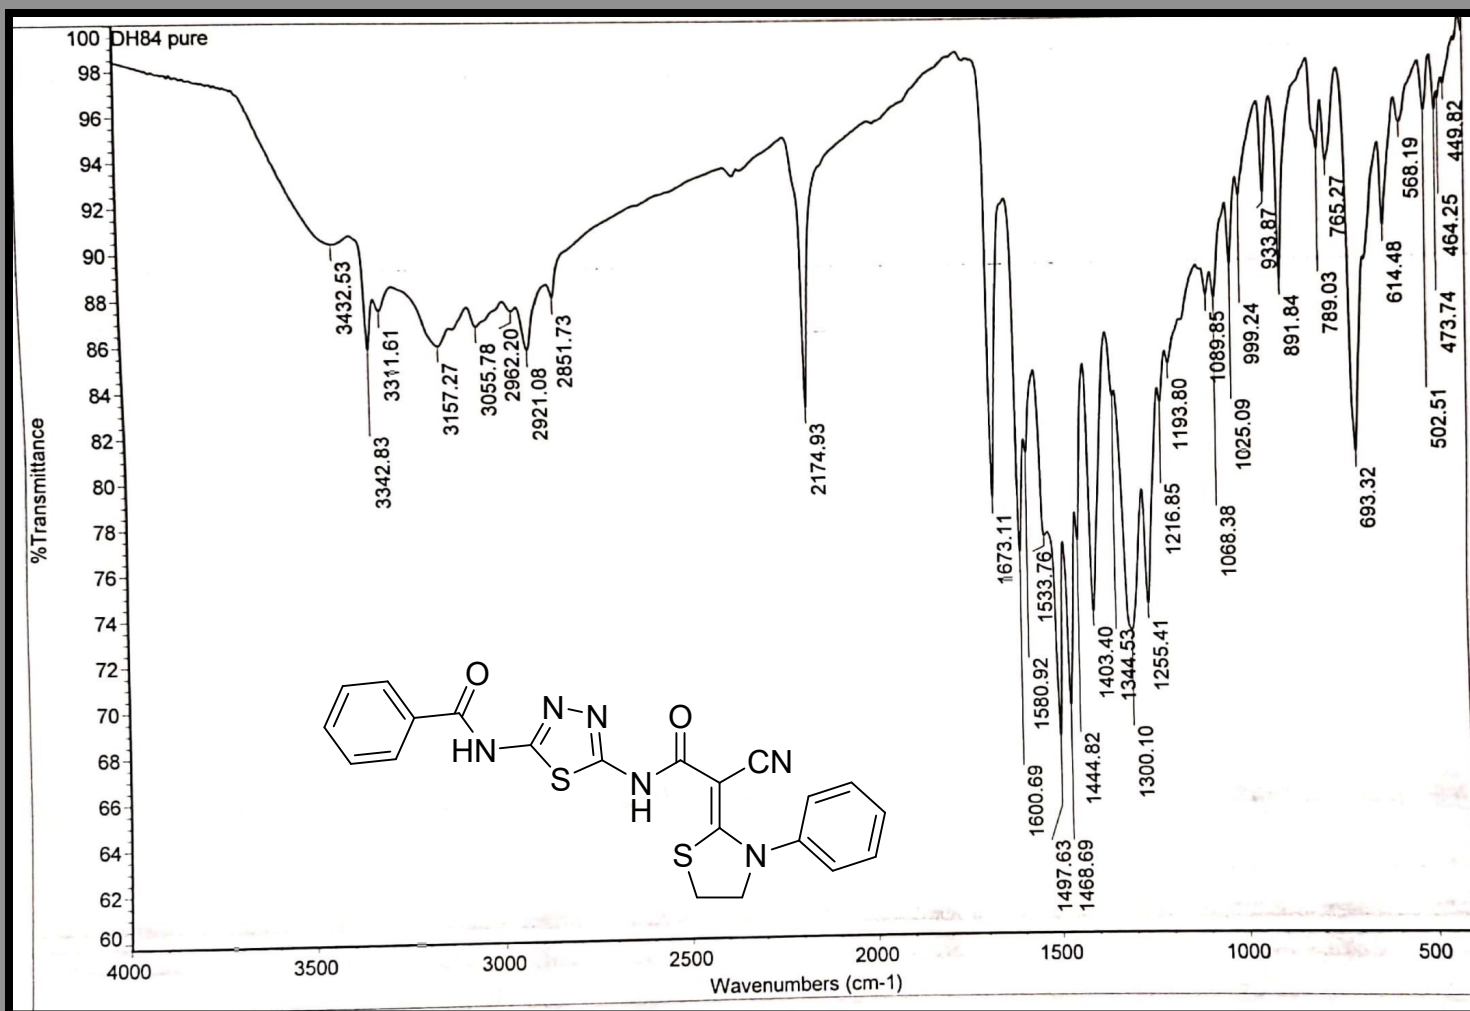

IR spectrum of compound 14

Paula Soliman\_H\_DH84

Microanalytical Unit - FOPCU - NMR laboratory  
www.pharma.cu.edu.eg dir-mau.fopcu@pharma.cu.edu.eg

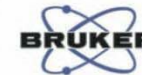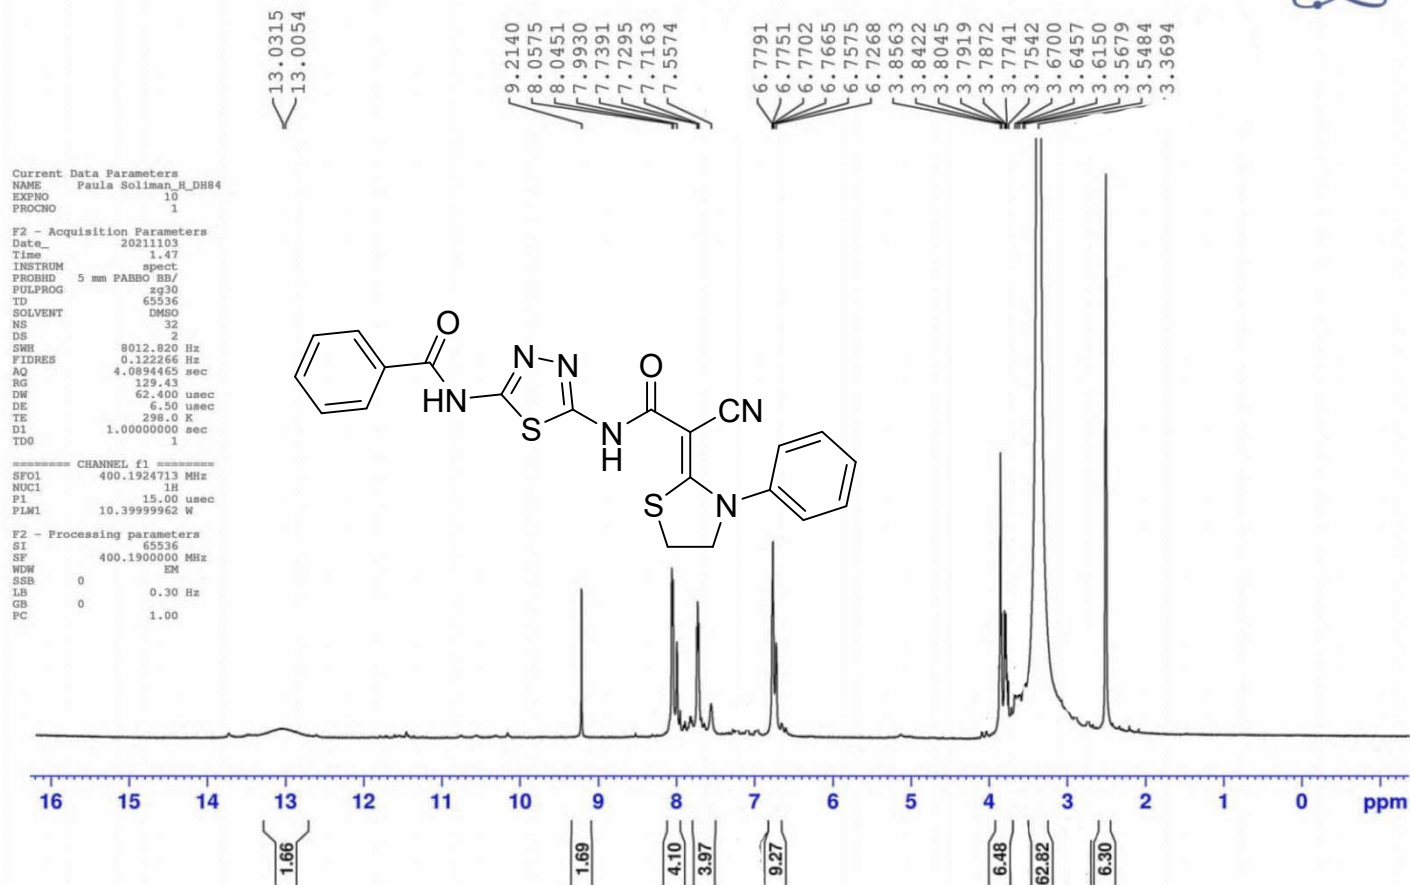

<sup>1</sup>H-NMR spectrum (DMSO-d<sub>6</sub>) of compound 14

Paula Soliman\_H\_DH84\_D2O

Microanalytical Unit - FOPCU - NMR laboratory  
www.pharma.cu.edu.eg dir-mau.fopcu@pharma.cu.edu.eg

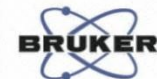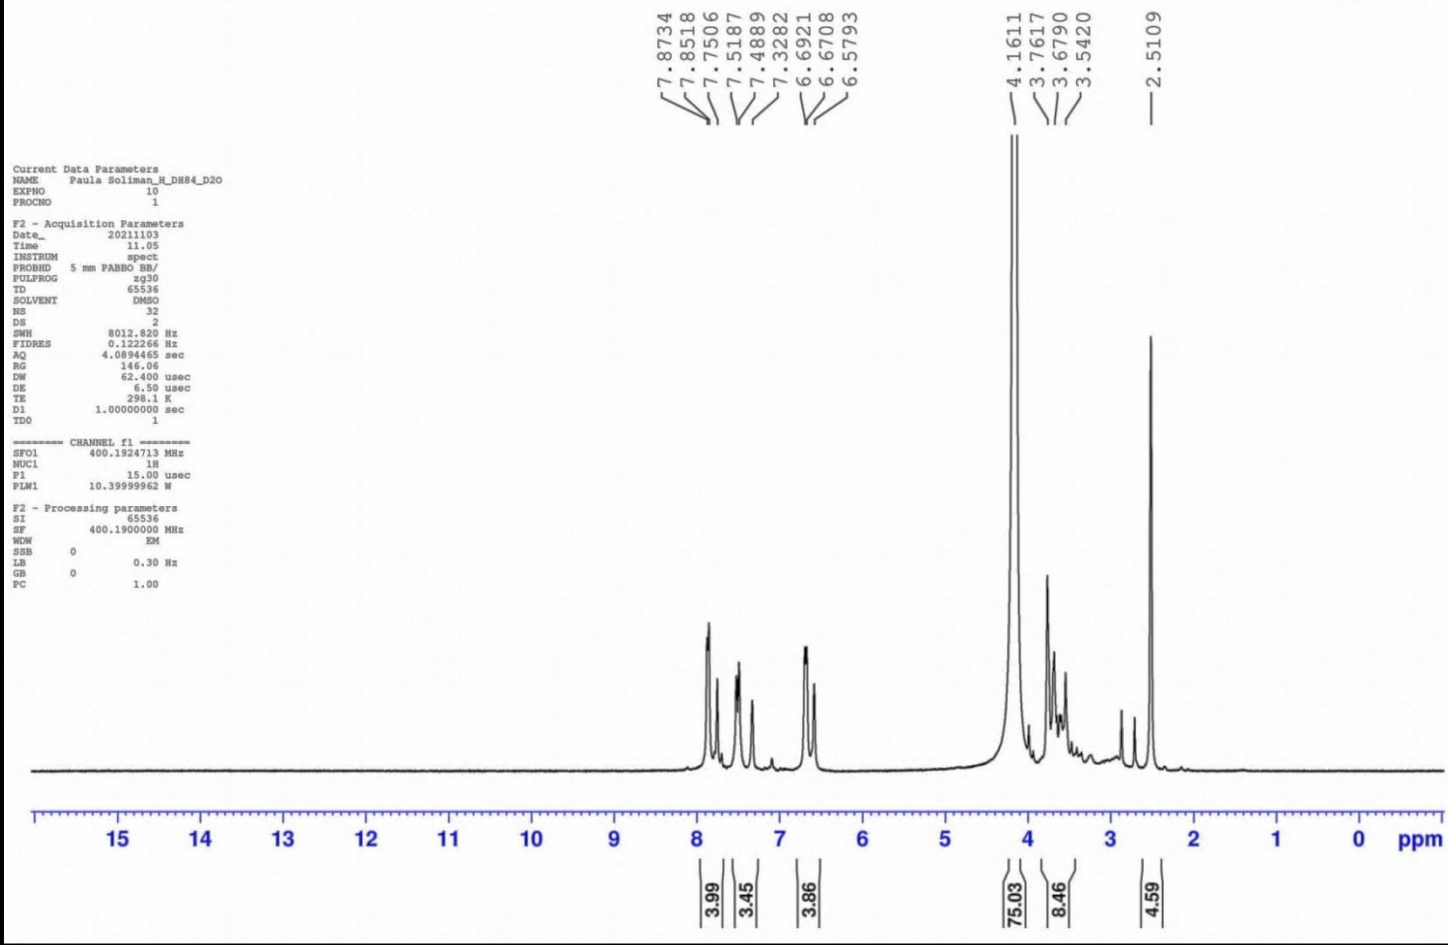

$^1\text{H}$ -NMR spectrum ( $\text{DMSO-d}_6 + \text{D}_2\text{O}$ ) of compound **14**



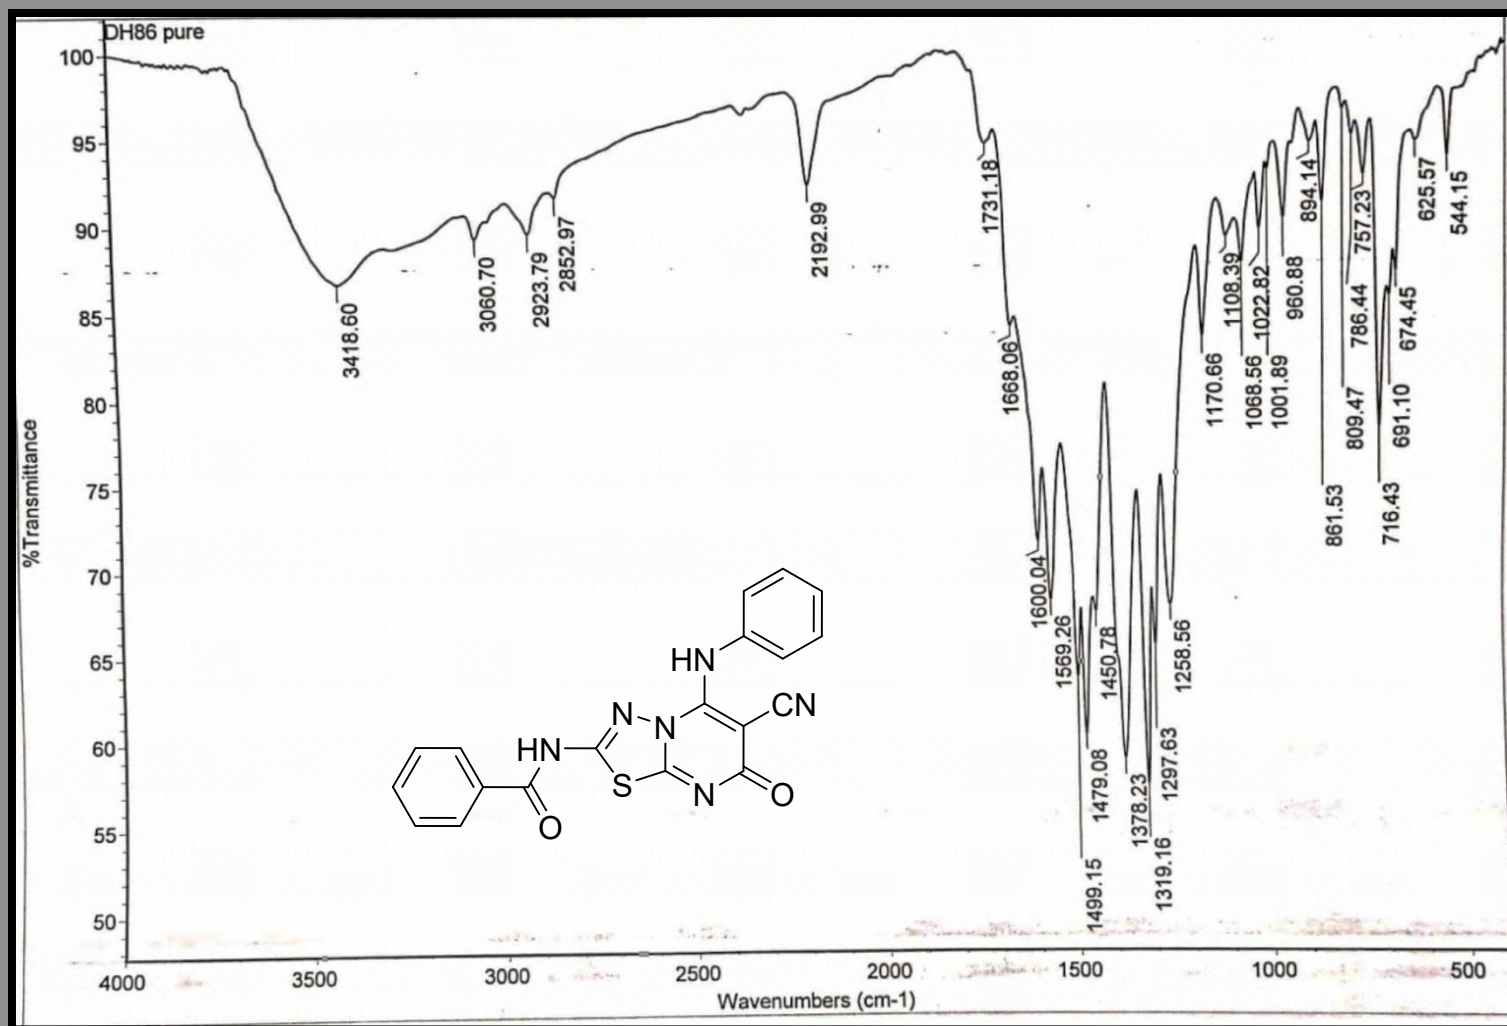

IR spectrum of compound 15

Paula Soliman\_H\_DH86

Microanalytical Unit - FOPCU - NMR laboratory  
www.pharma.cu.edu.eg dir-mau.fopcu@pharma.cu.edu.eg

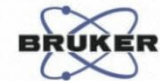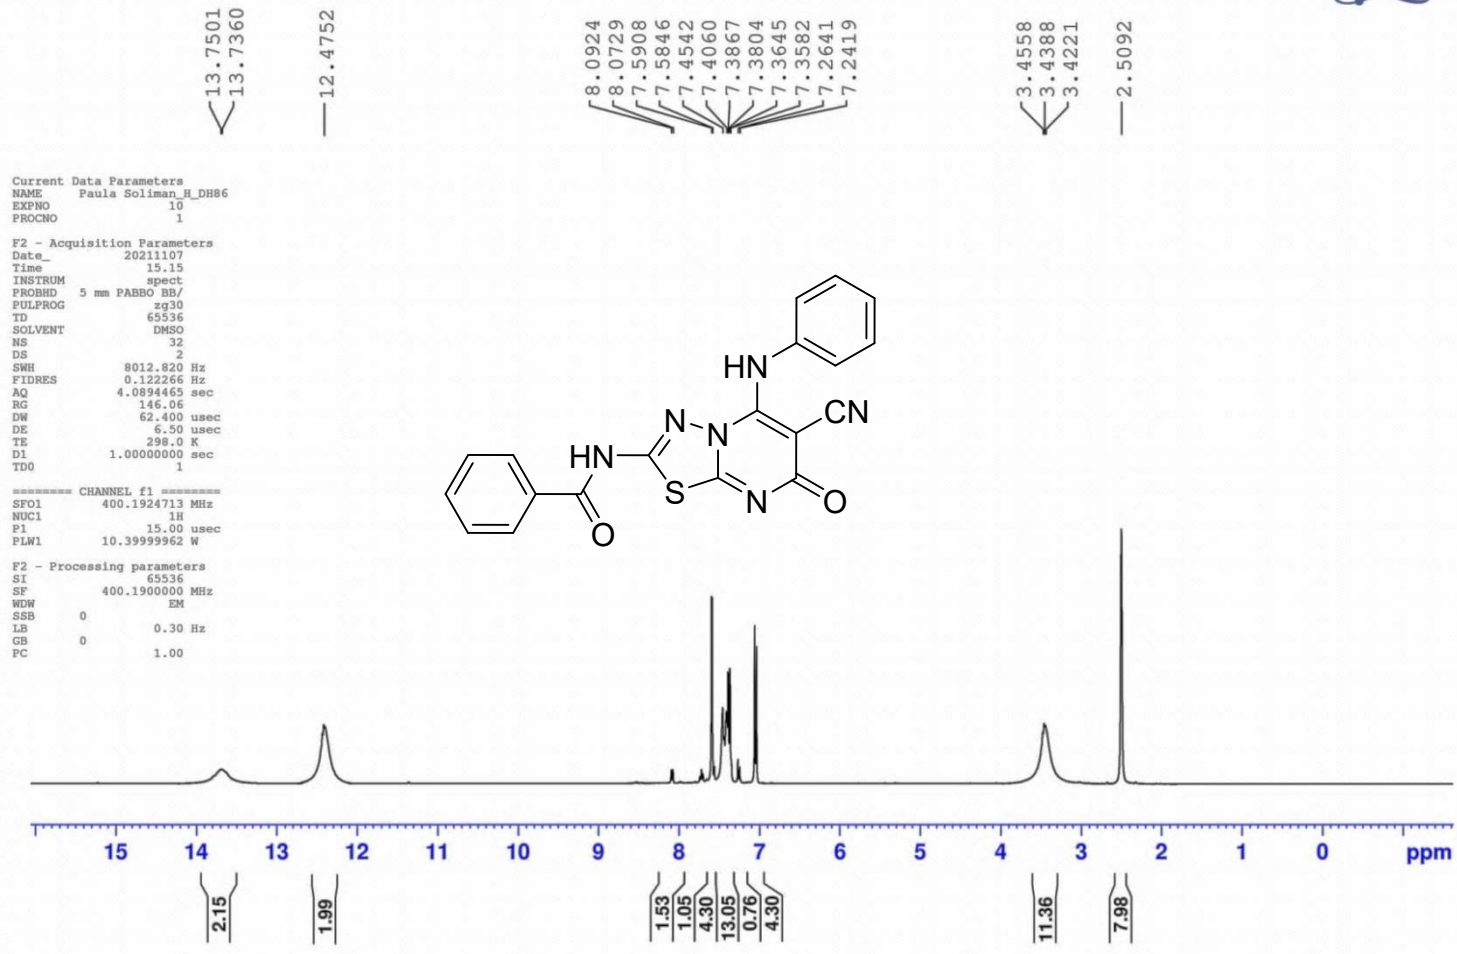

<sup>1</sup>H-NMR spectrum (DMSO-d<sub>6</sub>) of compound 15

Paula Soliman\_H\_DH86\_D2O

Microanalytical Unit - FOPCU - NMR laboratory  
www.pharma.cu.edu.eg dir-mau.fopcu@pharma.cu.edu.eg

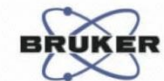

Current Data Parameters  
NAME Paula Soliman\_H\_DH86\_D2O  
EXPNO 10  
PROCNO 1

F2 - Acquisition Parameters  
Date\_ 20211108  
Time 12.24  
INSTRUM spect  
PROBHD 5 mm PABBO BB/  
PULPROG zg30  
TD 65536  
SOLVENT DMSO  
NS 32  
DS 2  
SWH 8012.820 Hz  
FIDRES 0.122266 Hz  
AQ 4.0894465 sec  
RG 129.43  
DW 62.400 usec  
DE 6.50 usec  
TE 298.1 K  
D1 1.00000000 sec  
TDO 1

CHANNEL f1  
SFO1 400.1924713 MHz  
NUC1 1H  
P1 15.00 usec  
PLW1 10.39999962 W

F2 - Processing parameters  
SI 65536  
SF 400.1900000 MHz  
WDW EM  
SSB 0  
LB 0.30 Hz  
GB 0  
PC 1.00

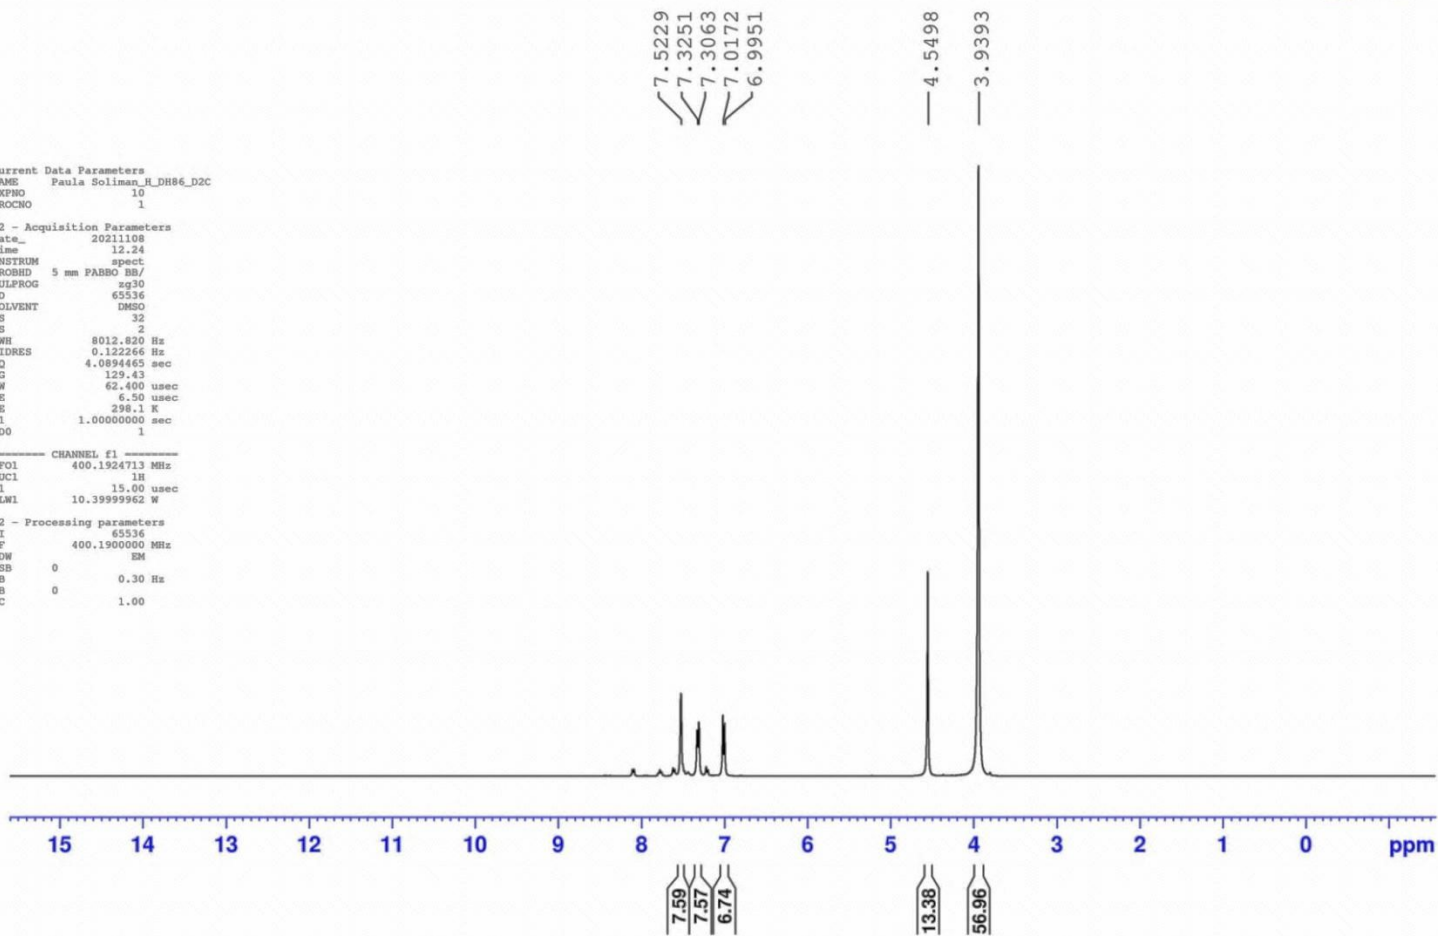

$^1\text{H}$ -NMR spectrum (DMSO- $d_6$ + D $_2$ O) of compound 15

Paula Soliman\_C\_DH86

Microanalytical Unit - FOPCU - NMR laboratory  
www.pharma.cu.edu.eg dir-mau.fopcu@pharma.cu.edu.eg

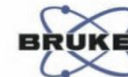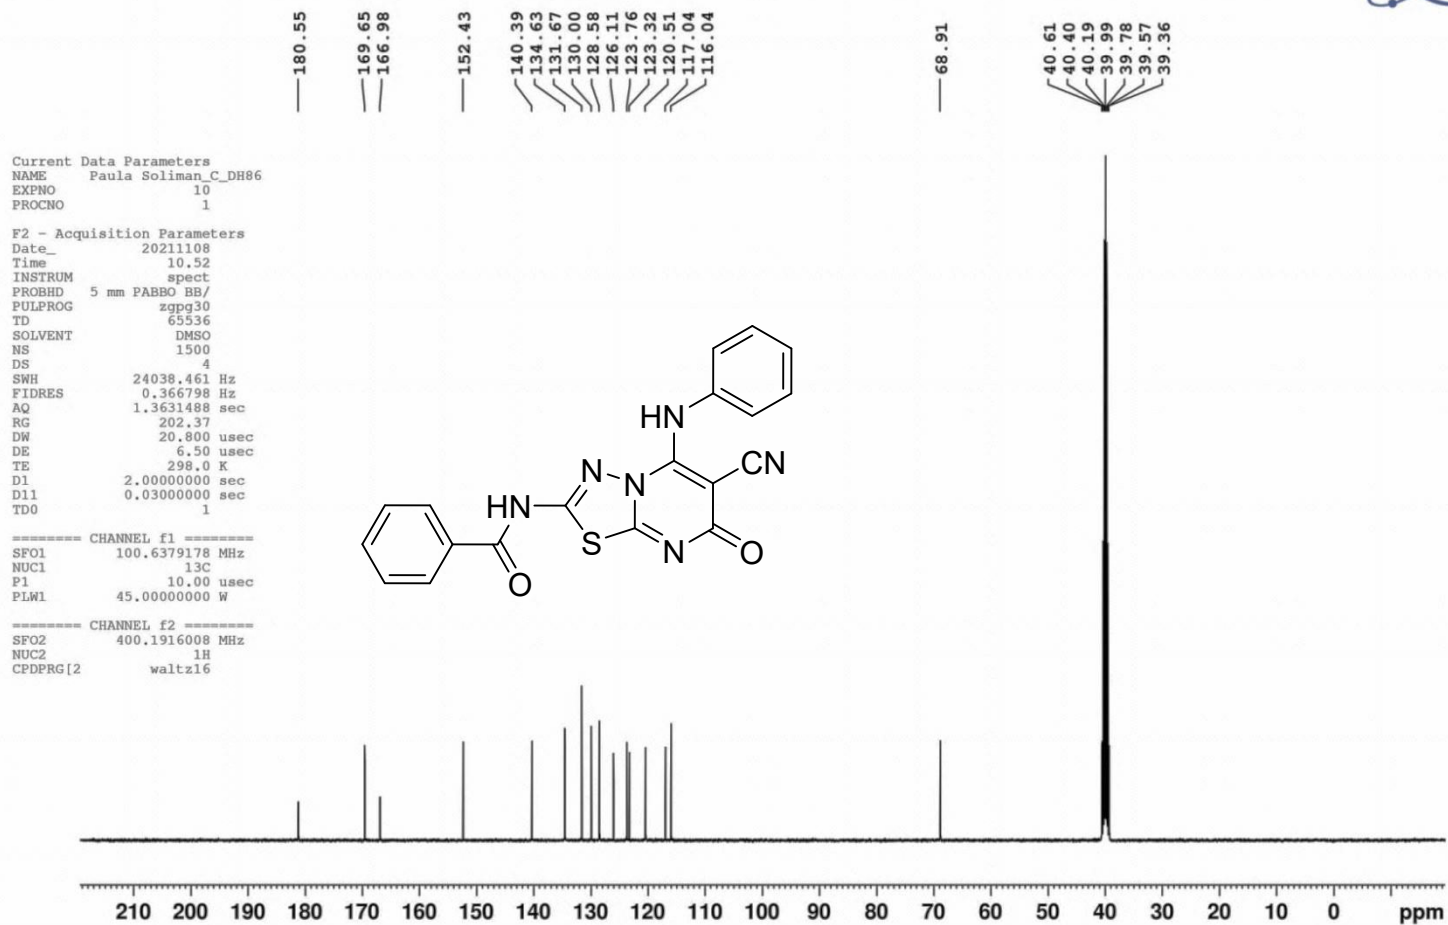

<sup>13</sup>C-NMR spectrum (DMSO-d<sub>6</sub>) of compound 15

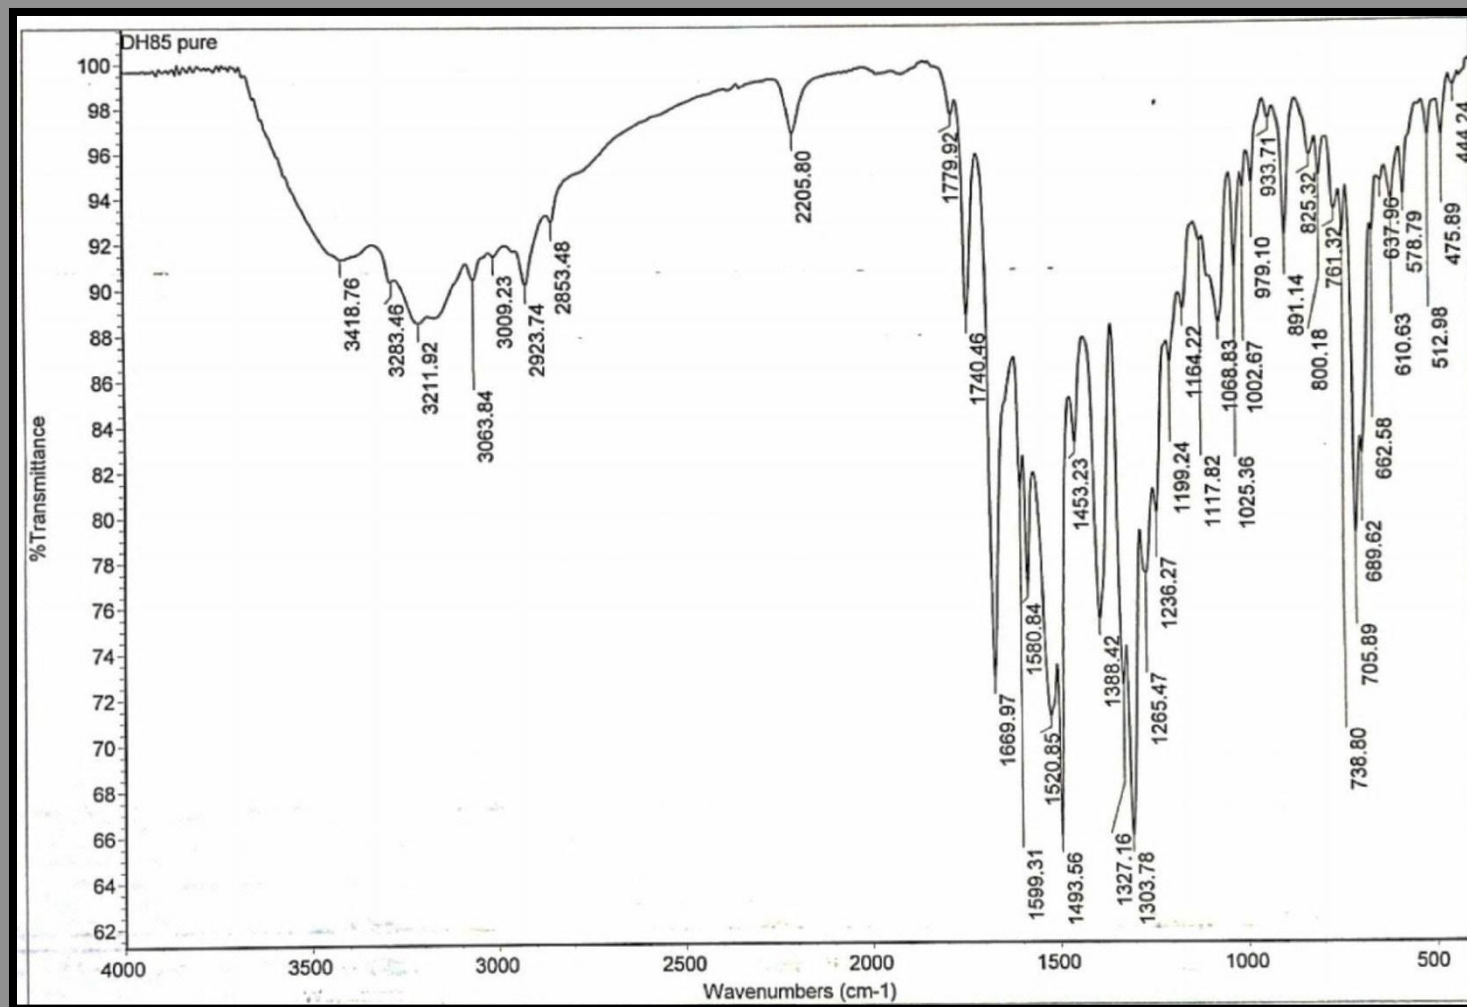

IR spectrum of compound 16

Poula Soliman\_H\_DH85

Microanalytical Unit - FOPCU - NMR laboratory  
www.pharma.cu.edu.eg dir-mau.fopcu@pharma.cu.edu.eg

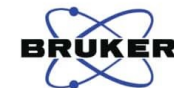

13.1567  
13.1155  
13.1095

9.2443  
8.1392  
8.1205  
7.6762  
7.6594  
7.6103  
7.5945  
7.5773  
7.5442  
7.5263  
7.4876  
7.4677

3.5439

2.5087

Current Data Parameters  
NAME Poula Soliman\_H\_DH85  
EXPNO 10  
PROCNO 1

F2 - Acquisition Parameters  
Date\_ 20210627  
Time 17.24  
INSTRUM spect  
PROBHD 5 mm PABBO BB/  
PULPROG zg30  
TD 65536  
SOLVENT DMSO  
NS 32  
DS 2  
SWH 8012.820 Hz  
FIDRES 0.122266 Hz  
AQ 4.0894465 sec  
RG 202.37  
DW 62.400 usec  
DE 6.50 usec  
TE 298.0 K  
D1 1.00000000 sec  
TDO 1

==== CHANNEL f1 =====  
SFO1 400.1924713 MHz  
NUC1 1H  
P1 15.00 usec  
PLW1 10.39999962 W

F2 - Processing parameters  
SI 65536  
SF 400.1900000 MHz  
WDW EM  
SSB 0  
LB 0.30 Hz  
GB 0  
PC 1.00

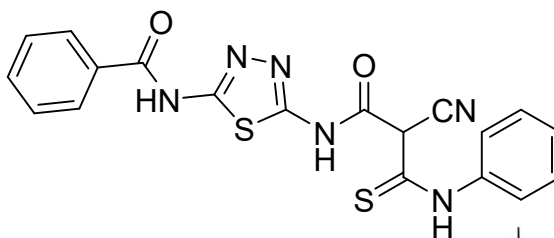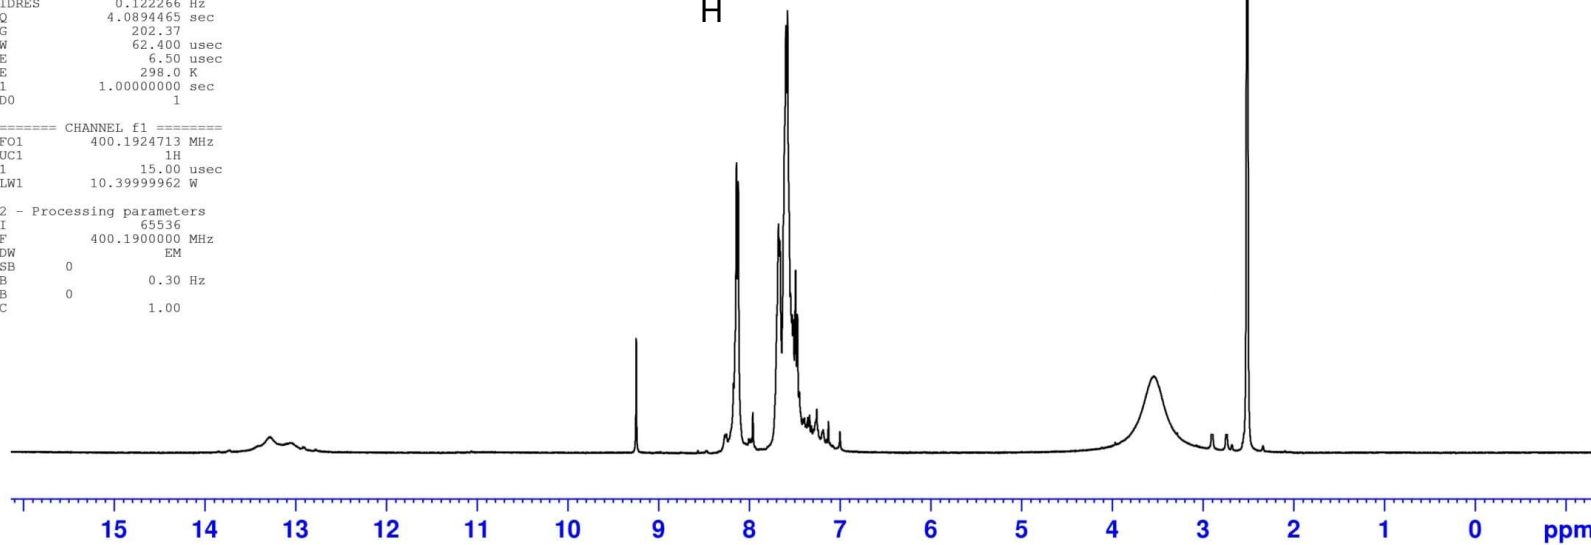

4.13

3.79

17.51

25.39

18.69

16.71

$^1\text{H-NMR}$  spectrum (DMSO- $d_6$ ) of compound **16**

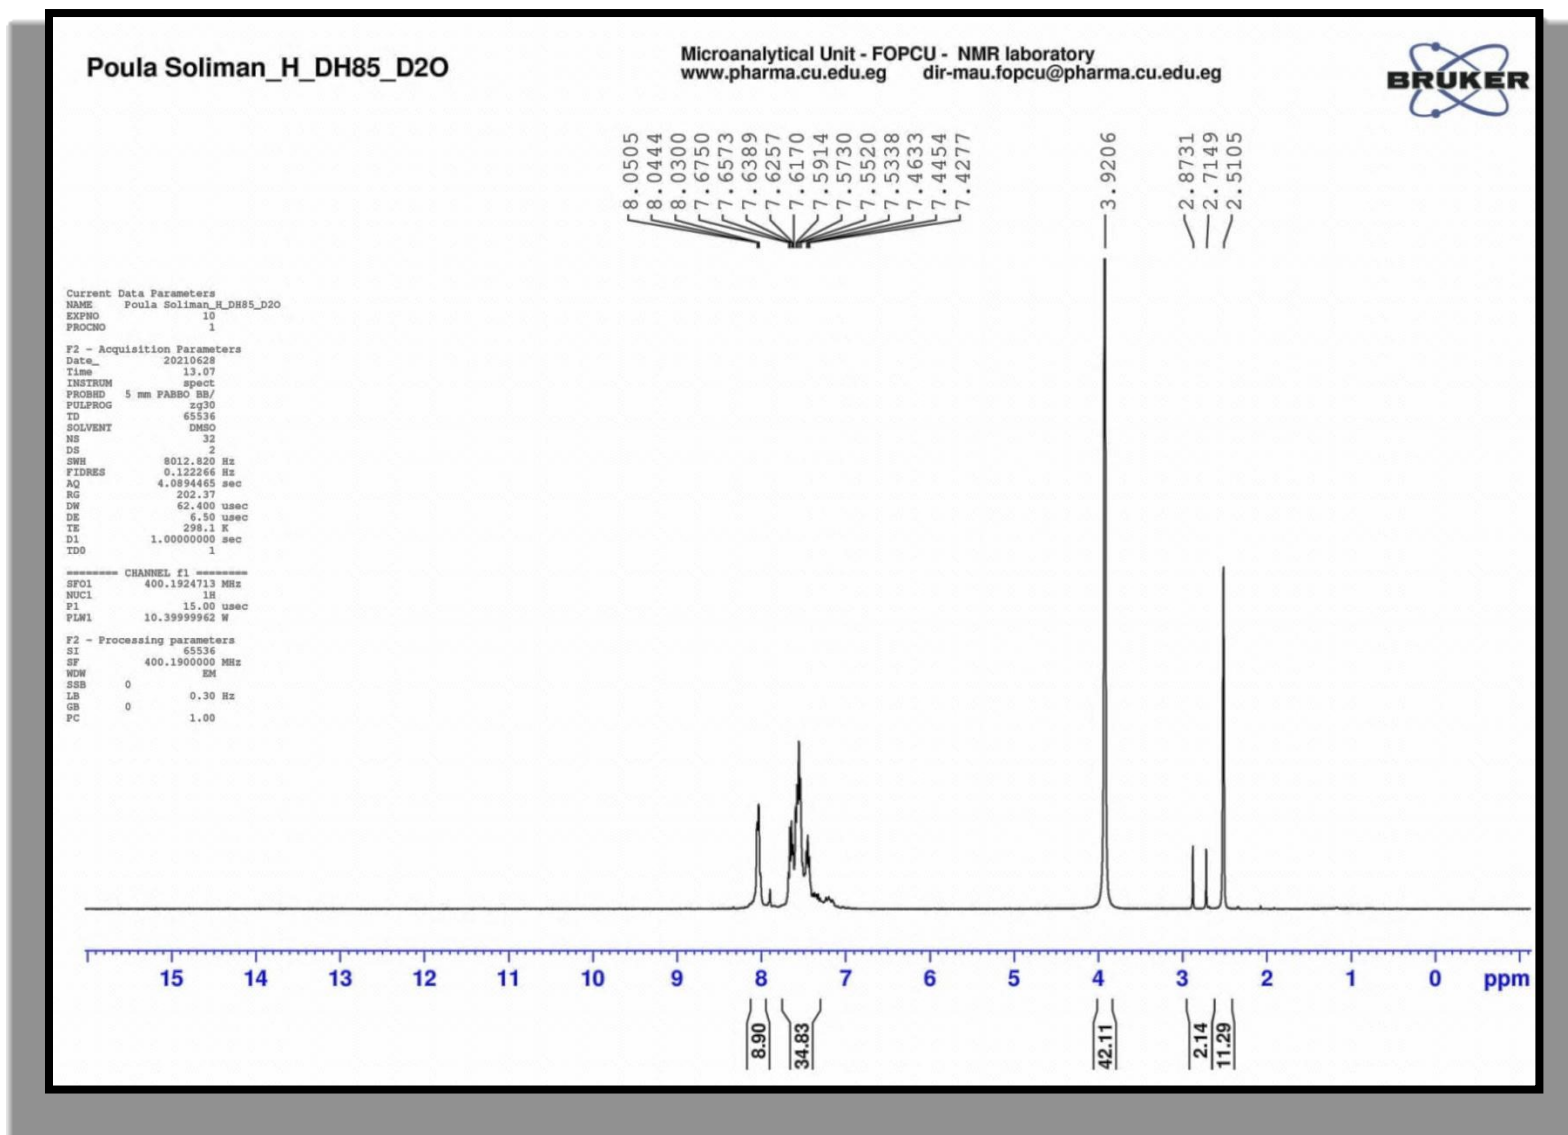

$^1\text{H-NMR}$  spectrum (DMSO- $d_6$ +  $\text{D}_2\text{O}$ ) of compound **16**

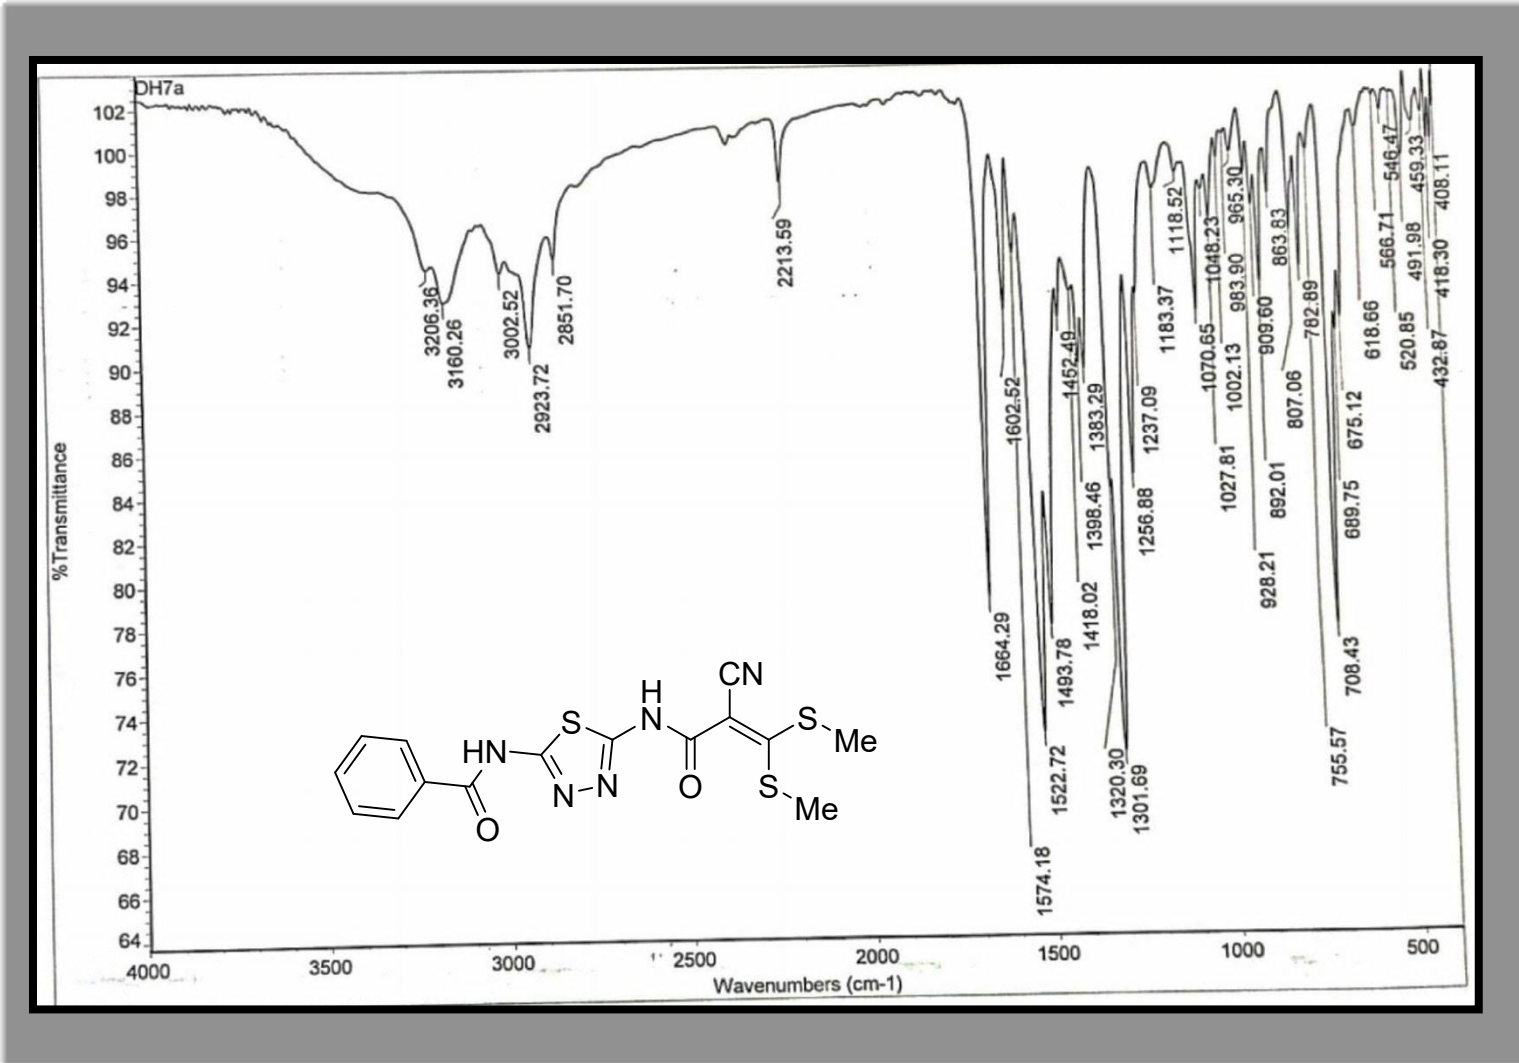

IR spectrum of compound 17



Poula Soliman\_H\_DH7A

Microanalytical Unit - FOPCU - NMR laboratory  
www.pharma.cu.edu.eg dir-mau.fopcu@pharma.cu.edu.eg

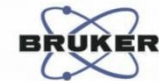

14.7501  
14.7360

13.2549

8.2778  
8.2601  
8.2567  
8.1567  
8.1385  
7.7109  
7.6925  
7.6740  
7.6066  
7.5871  
7.5684  
7.5529  
7.5339  
7.5160

4.0546  
3.5740  
3.3378  
2.7069  
2.7003  
2.6839  
2.6751  
2.5086

Current Data Parameters  
NAME Poula Soliman\_H\_DH7A  
EXPNO 10  
PROCNO 1

F2 - Acquisition Parameters  
Date\_ 20210627  
Time 17.19  
INSTRUM spect  
PROBHD 5 mm PABBO BB/  
PULPROG zg30  
TD 65536  
SOLVENT DMSO  
NS 32  
DS 2  
SWH 8012.820 Hz  
FIDRES 0.122266 Hz  
AQ 4.0894465 sec  
RG 202.37  
DW 62.400 usec  
DE 6.50 usec  
TE 298.0 K  
D1 1.00000000 sec  
TD0 1

----- CHANNEL f1 -----  
SF01 400.1924713 MHz  
NUC1 1H  
P1 15.00 usec  
PLM1 10.39999962 W

F2 - Processing parameters  
SI 65536  
SF 400.1900000 MHz  
WDW EM  
SSB 0  
LB 0.30 Hz  
GB 0  
PC 1.00

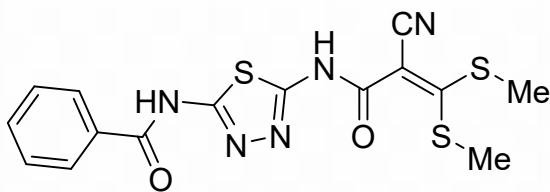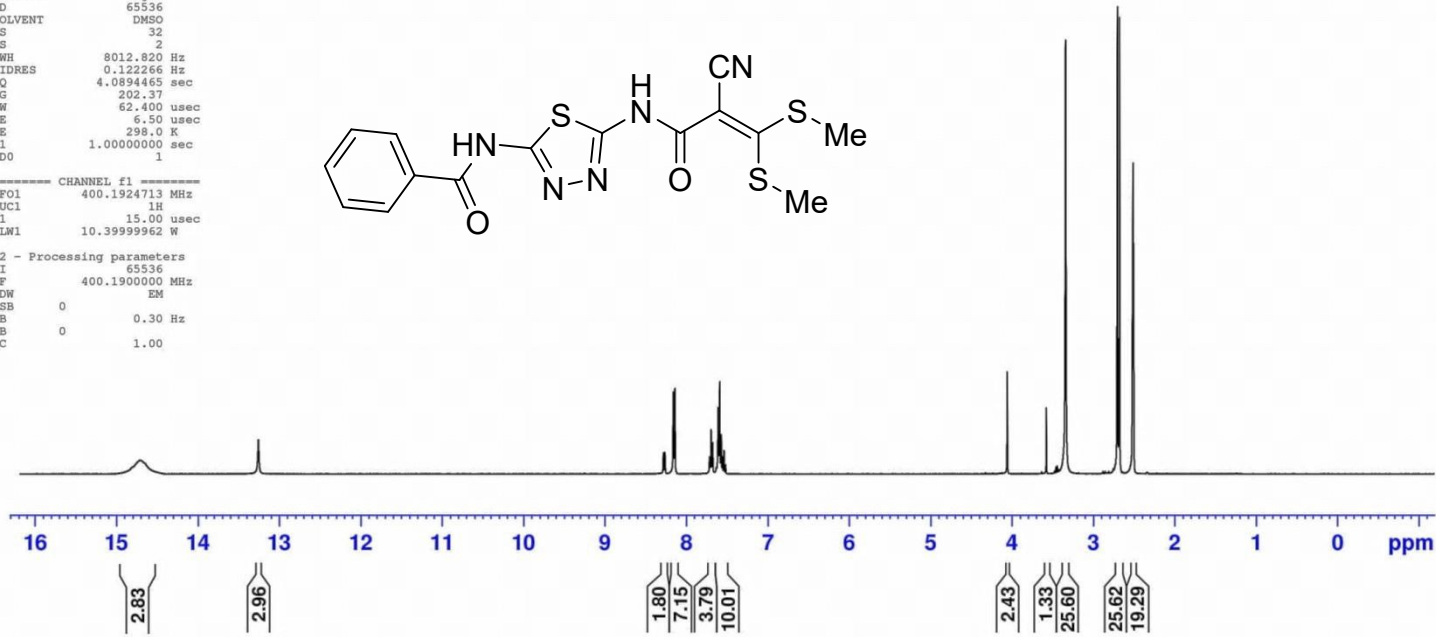

<sup>1</sup>H-NMR spectrum (DMSO-d<sub>6</sub>) of compound 17

Poula Soliman\_H\_DH7A\_D2O

Microanalytical Unit - FOPCU - NMR laboratory  
www.pharma.cu.edu.eg dir-mau.fopcu@pharma.cu.edu.eg

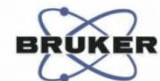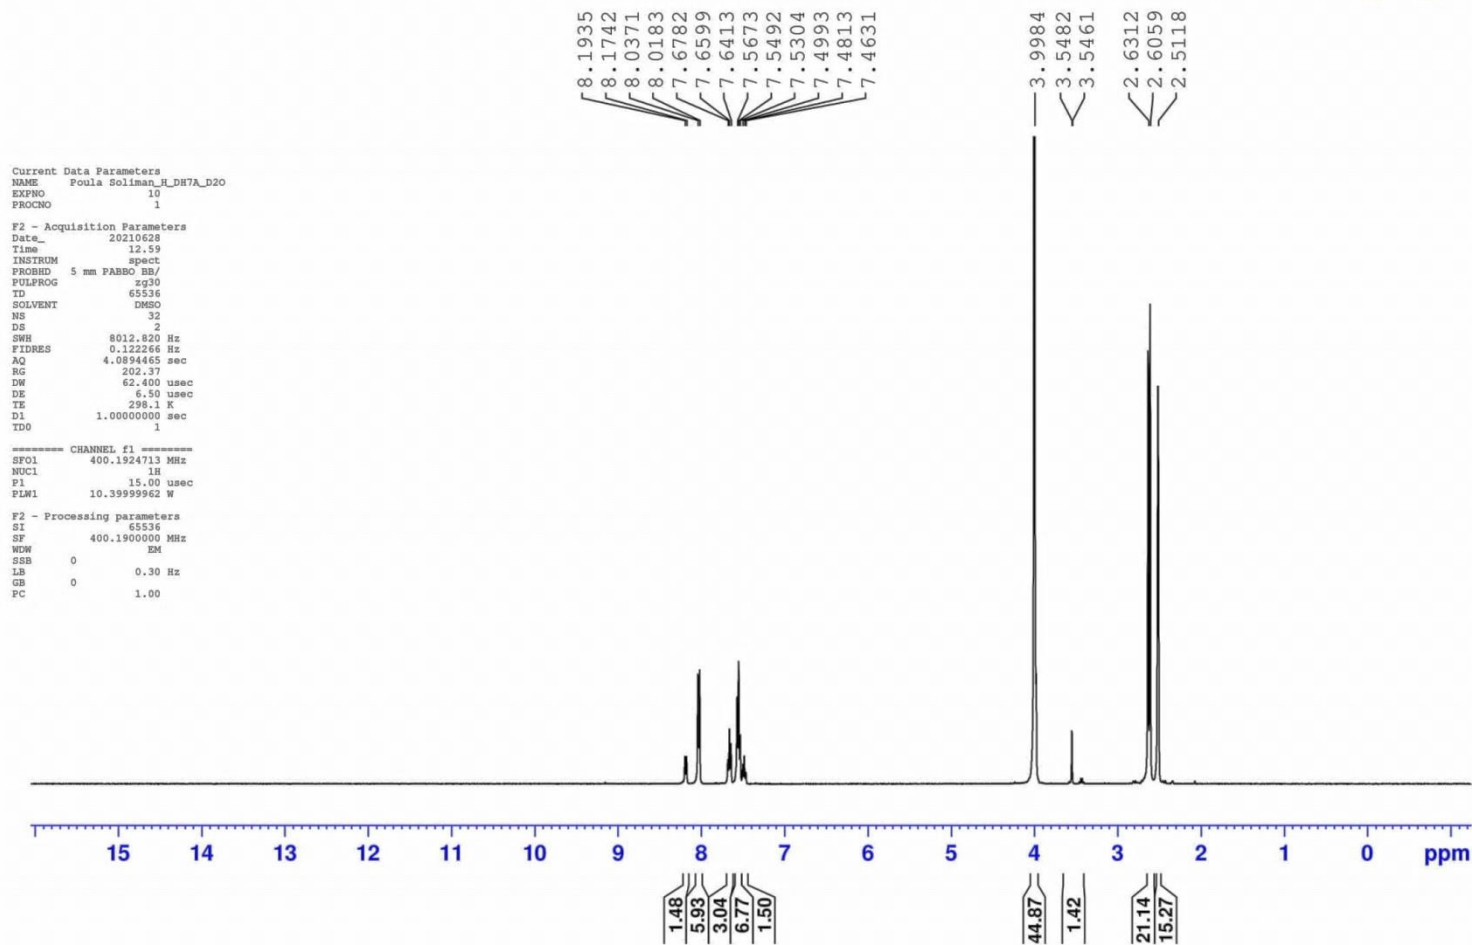

$^1\text{H-NMR}$  spectrum (DMSO- $d_6$ +  $\text{D}_2\text{O}$ ) of compound 17

Paula Soliman\_C\_DH7A

Microanalytical Unit - FOPCU - NMR laboratory  
www.pharma.cu.edu.eg dir-mau.fopcu@pharma.cu.edu.eg

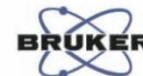

170.64  
167.99  
153.43  
141.38  
133.65  
132.68  
131.00  
129.60  
127.10  
123.78  
123.32  
121.52  
118.04  
117.06  
69.90  
40.62  
40.41  
40.20  
39.99  
39.78  
39.57  
39.36  
20.98

Current Data Parameters  
NAME Paula Soliman\_C\_DH7A  
EXPNO 10  
PROCNO 1

F2 - Acquisition Parameters  
Date\_ 20210628  
Time 9.30  
INSTRUM spect  
PROBHD 5 mm PABBO BB/  
PULPROG zgpg30  
TD 65536  
SOLVENT DMSO  
NS 1500  
DS 4  
SWH 24038.461 Hz  
FIDRES 0.366798 Hz  
AQ 1.3631488 sec  
RG 202.37  
DW 20.800 usec  
DE 6.50 usec  
TE 298.0 K  
D1 2.0000000 sec  
D11 0.03000000 sec  
TDO 1

==== CHANNEL f1 =====  
SFO1 100.6379178 MHz  
NUC1 13C  
P1 10.00 usec  
PLW1 45.00000000 W

==== CHANNEL f2 =====  
SFO2 400.1916008 MHz  
NUC2 1H  
CPDPRG[2] waltz16

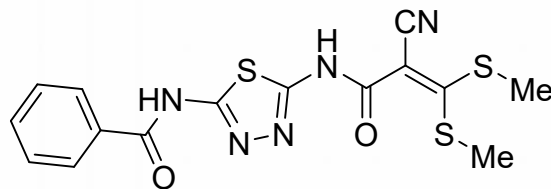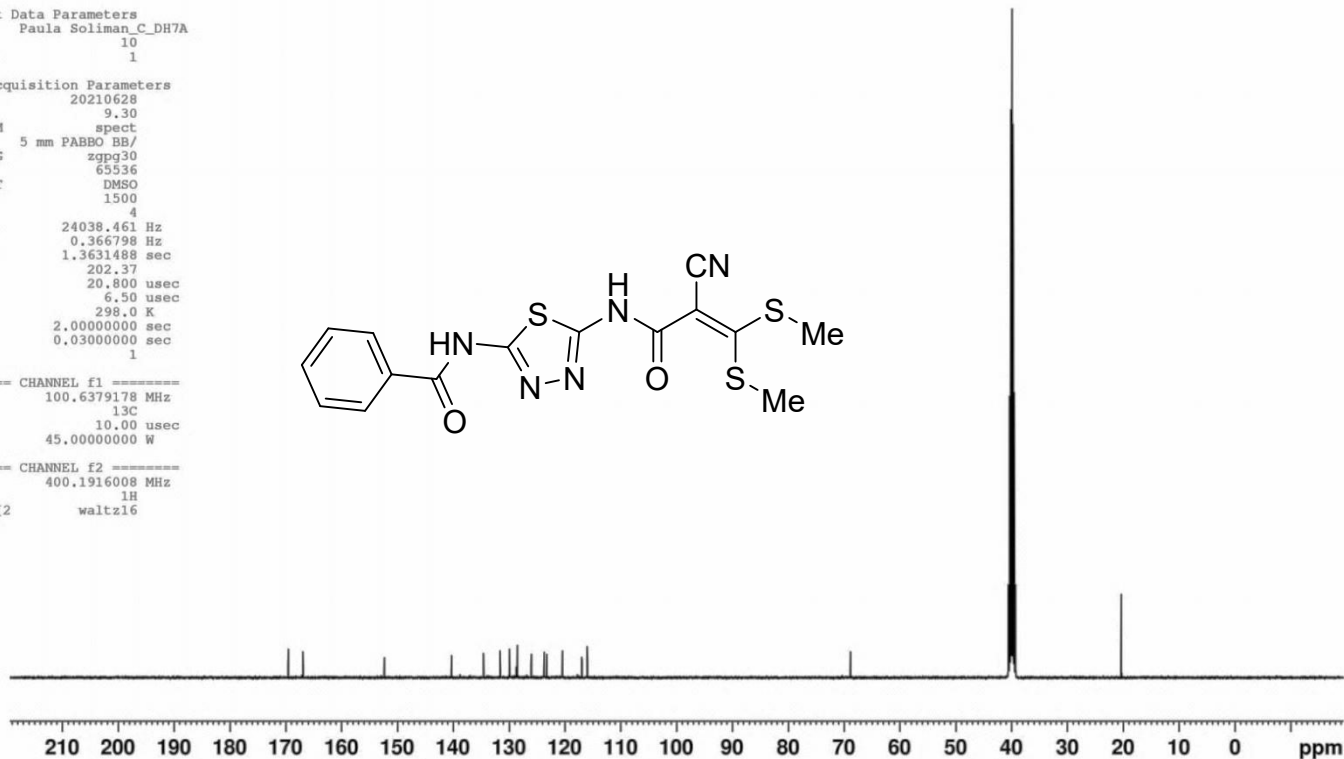

<sup>13</sup>C-NMR spectrum (DMSO-d<sub>6</sub>) of compound 17

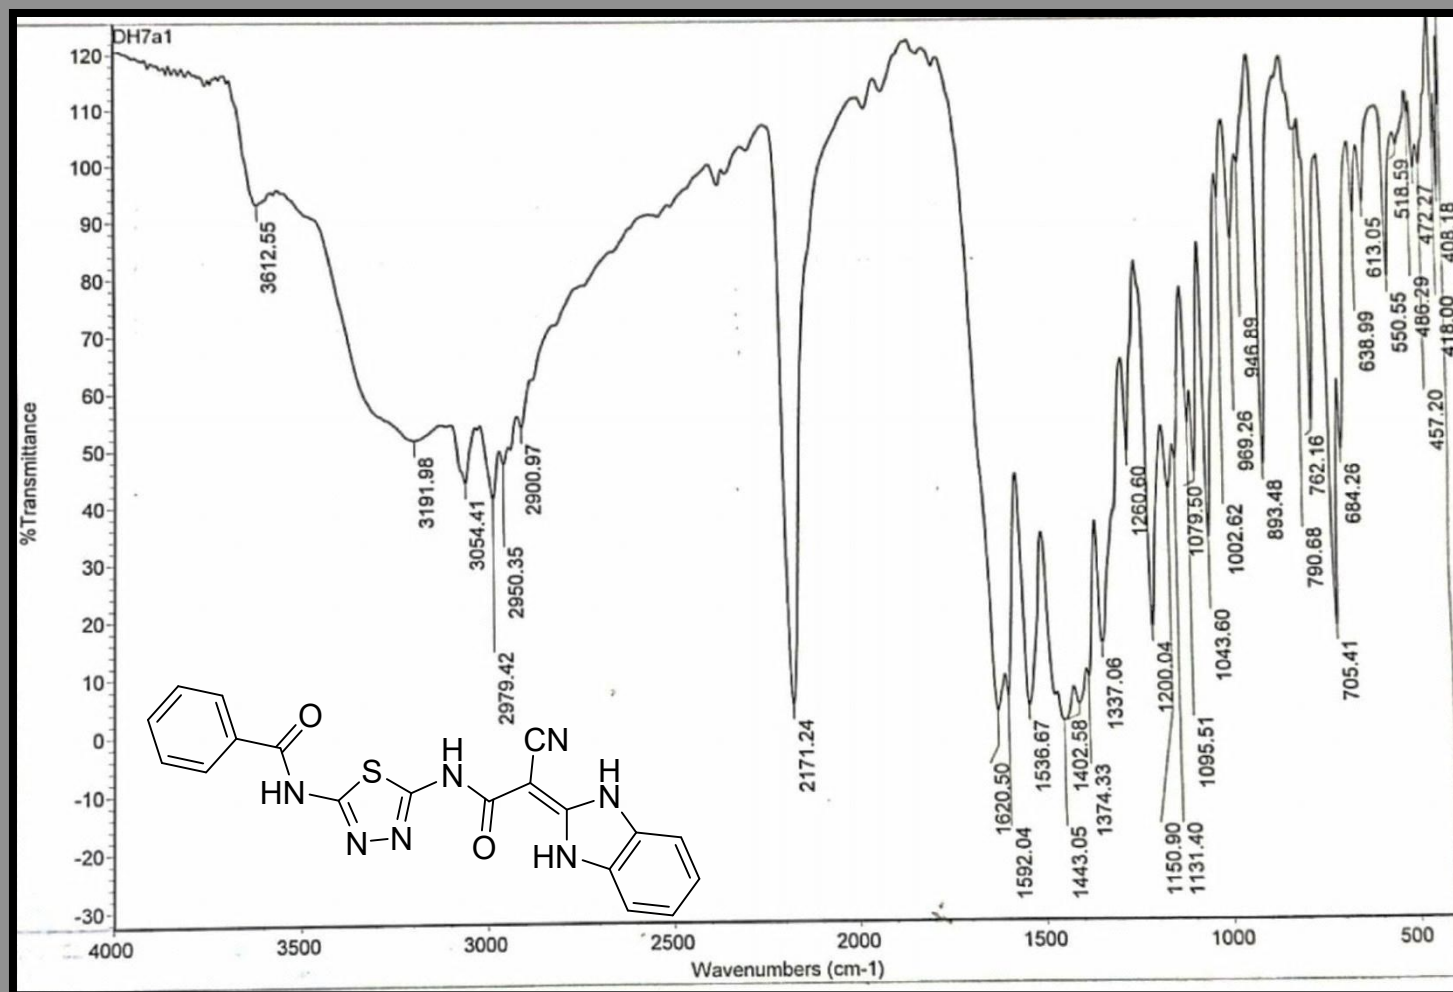

IR spectrum of compound 18

Poula Soliman\_H\_DH7A1

Microanalytical Unit - FOPCU - NMR laboratory  
www.pharma.cu.edu.eg dir-mau.fopcu@pharma.cu.edu.eg

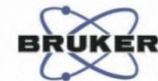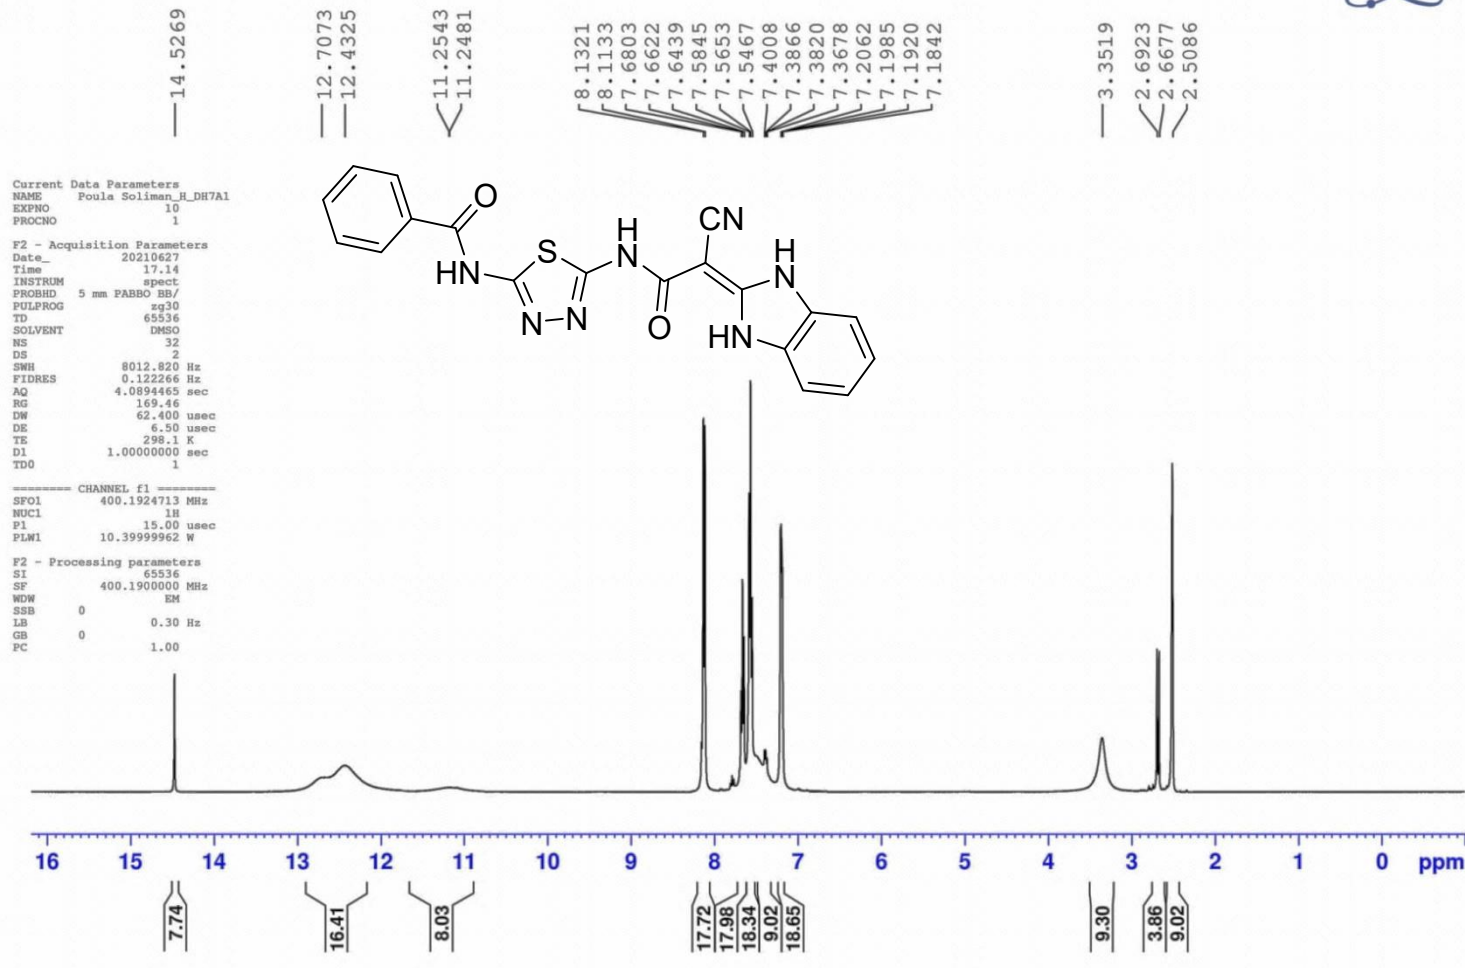

<sup>1</sup>H-NMR spectrum (DMSO-d<sub>6</sub>+ D<sub>2</sub>O) of compound 18

Poula Soliman\_H\_DH7A1\_D2O

Microanalytical Unit - FOPCU - NMR laboratory  
www.pharma.cu.edu.eg dir-mau.fopcu@pharma.cu.edu.eg

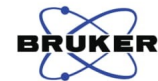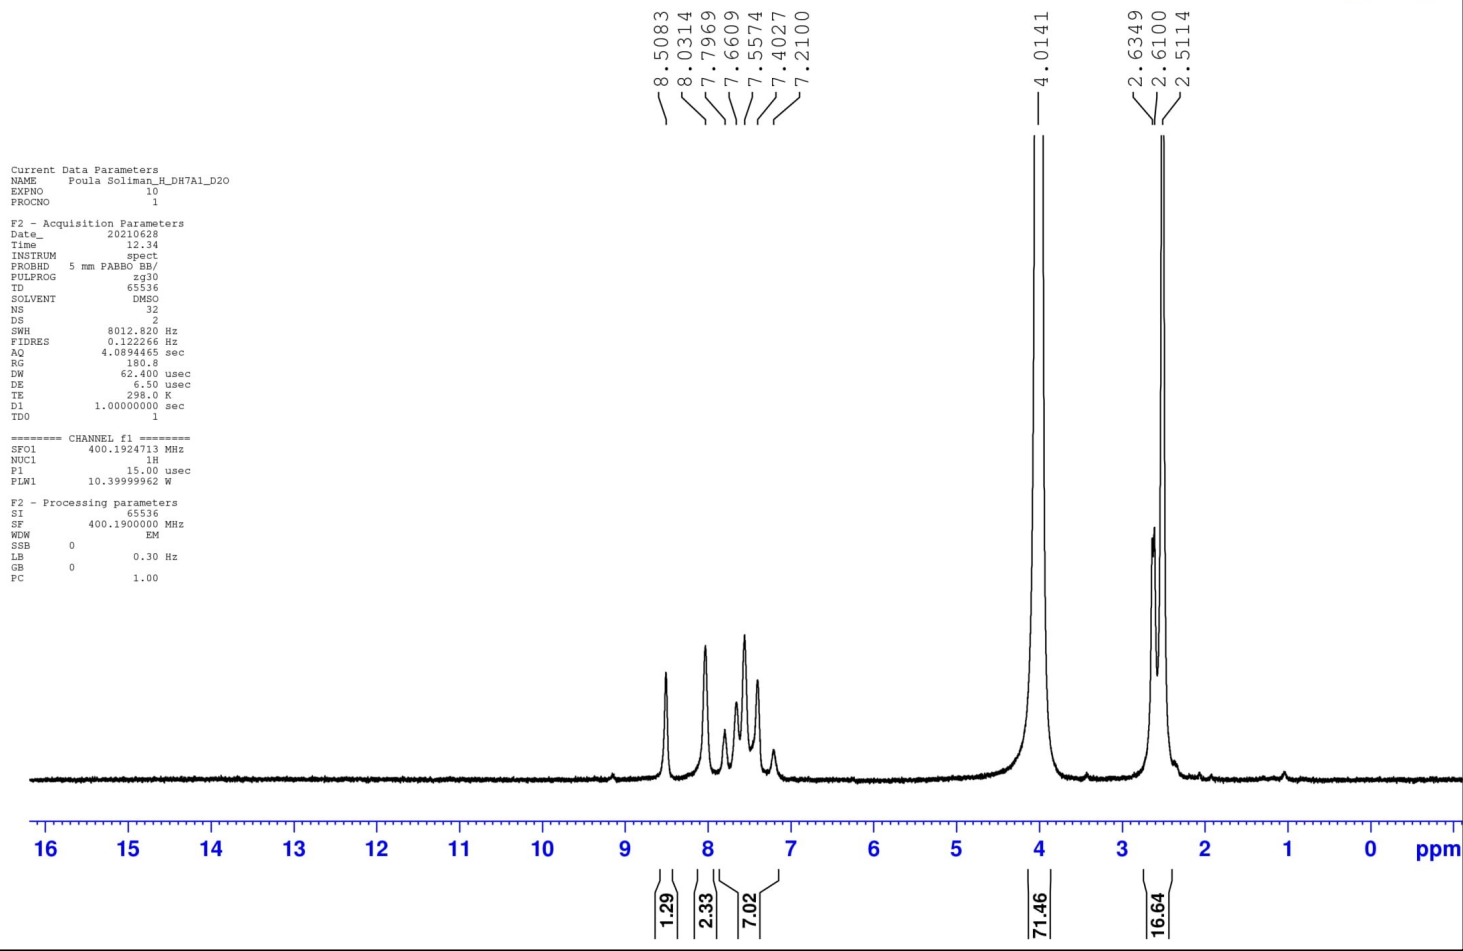

$^1\text{H}$ -NMR spectrum (DMSO- $d_6$ +  $\text{D}_2\text{O}$ ) of compound 18

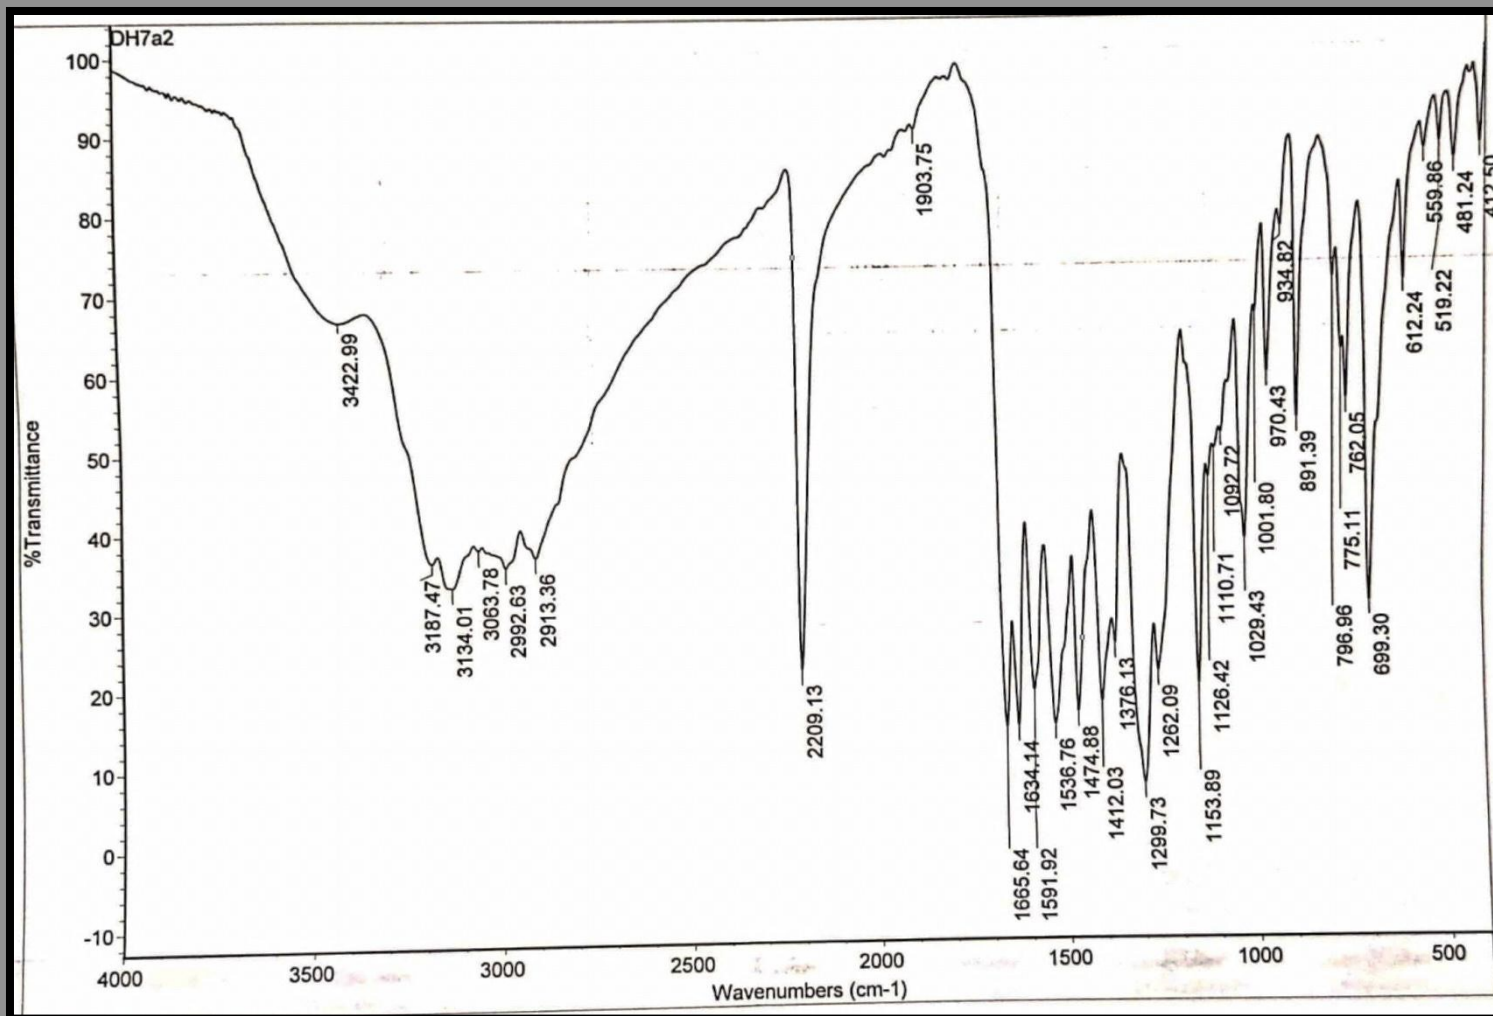

IR spectrum of compound 19

Paula Soliman\_H\_DH7a2

Microanalytical Unit - FOPCU - NMR laboratory  
www.pharma.cu.edu.eg dir-mau.fopcu@pharma.cu.edu.eg

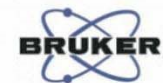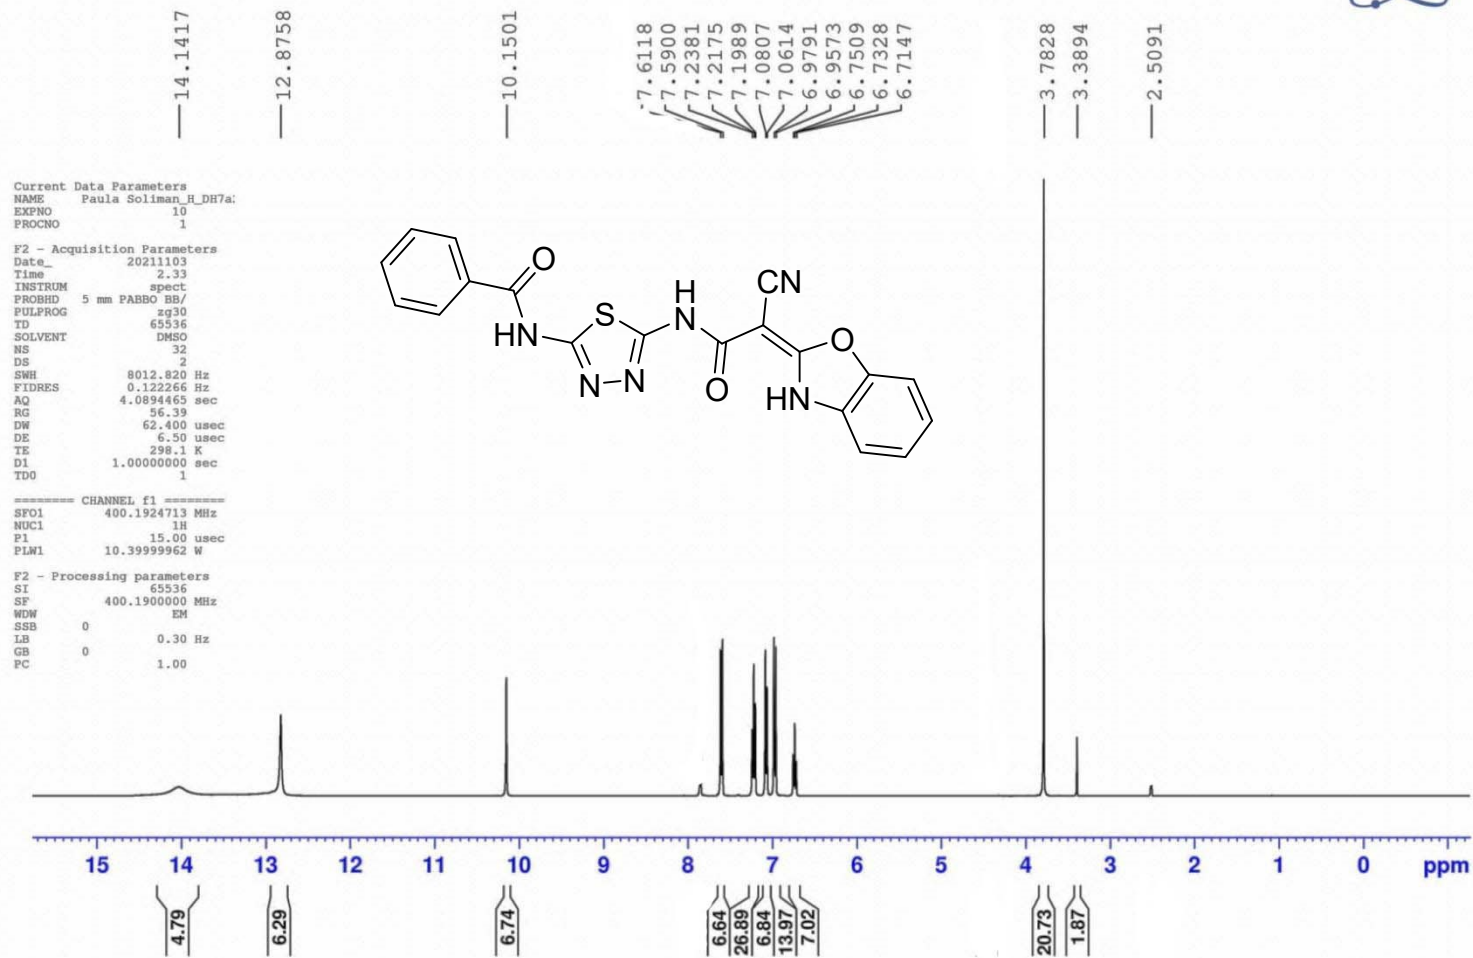

<sup>1</sup>H-NMR spectrum (DMSO-d<sub>6</sub>) of compound 19



Paula Soliman\_H\_DH7a\_D2O

Microanalytical Unit - FOPCU - NMR laboratory  
www.pharma.cu.edu.eg dir-mau.fopcu@pharma.cu.edu.eg

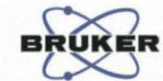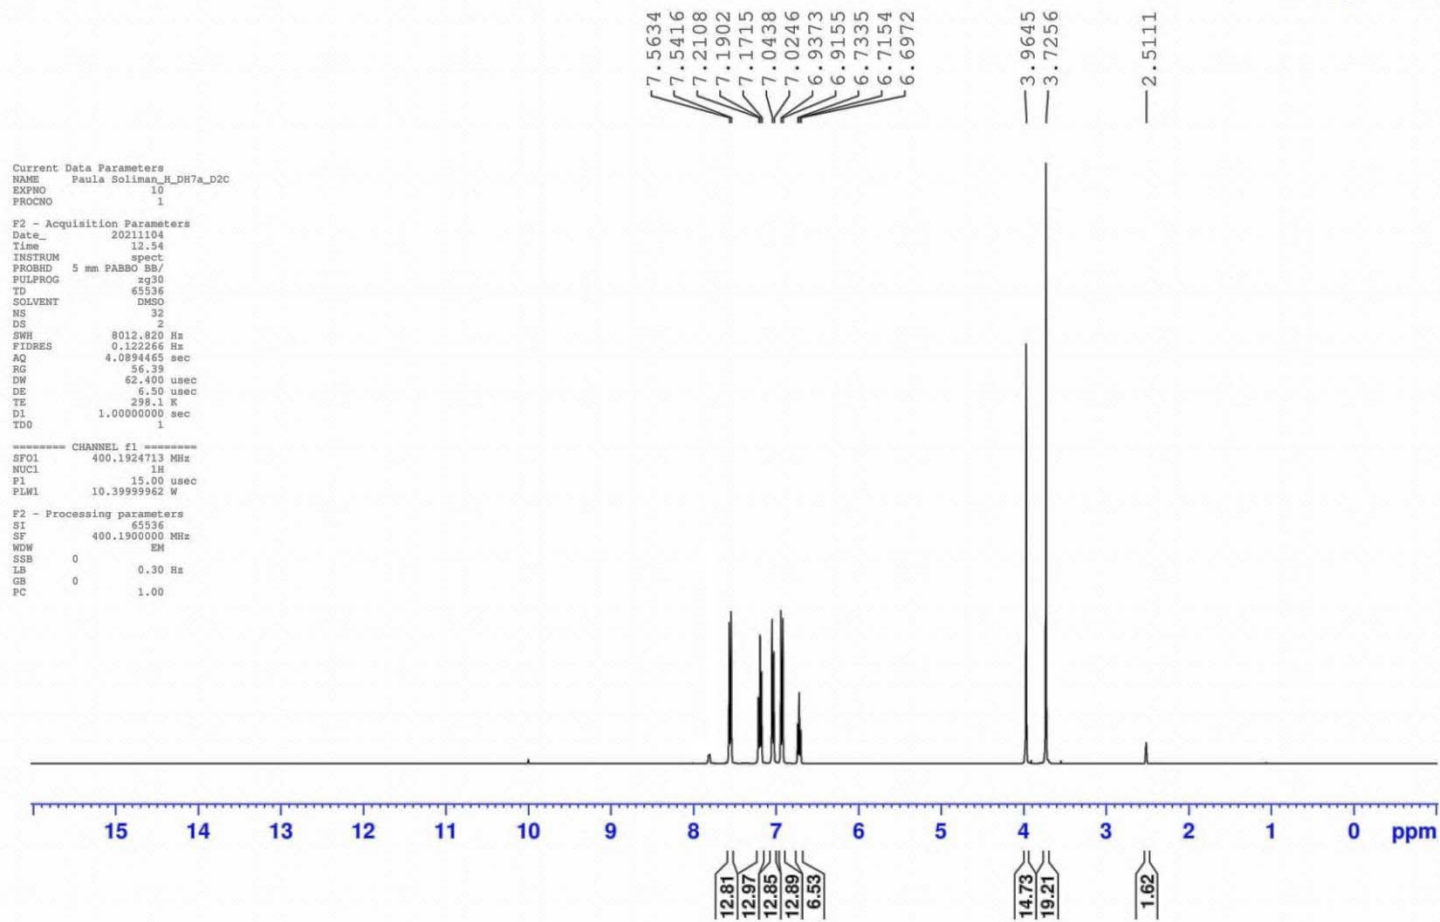

$^1\text{H-NMR}$  spectrum ( $\text{DMSO-d}_6 + \text{D}_2\text{O}$ ) of compound 19

Paula Soliman\_C\_DH7a

Microanalytical Unit - FOPCU - NMR laboratory  
www.pharma.cu.edu.eg dir-mau.fopcu@pharma.cu.edu.eg

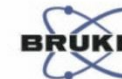

— 185.65  
— 159.78  
— 155.99  
— 154.68  
— 146.06  
— 137.06  
— 129.53  
— 128.99  
— 127.50  
— 118.80  
— 114.63  
— 112.29  
— 55.62  
— 40.63  
— 40.42  
— 40.21  
— 40.00  
— 39.79  
— 39.58  
— 39.38

Current Data Parameters  
NAME Paula Soliman\_C\_DH7a  
EXPNO 10  
PROCNO 1

F2 - Acquisition Parameters  
Date\_ 20211104  
Time 8.00  
INSTRUM spect  
PROBHD 5 mm PABBO BB/  
PULPROG zgpg30  
TD 65536  
SOLVENT DMSO  
NS 1500  
DS 4  
SWH 24038.461 Hz  
FIDRES 0.366798 Hz  
AQ 1.3631488 sec  
RG 202.37  
DW 20.800 usec  
DE 6.50 usec  
TE 298.0 K  
D1 2.00000000 sec  
D11 0.03000000 sec  
TD0 1

==== CHANNEL f1 =====  
SFO1 100.6379178 MHz  
NUC1 13C  
P1 10.00 usec  
PLW1 45.00000000 W

==== CHANNEL f2 =====  
SFO2 400.1916008 MHz  
NUC2 1H  
CPDPRG[2] waltz16

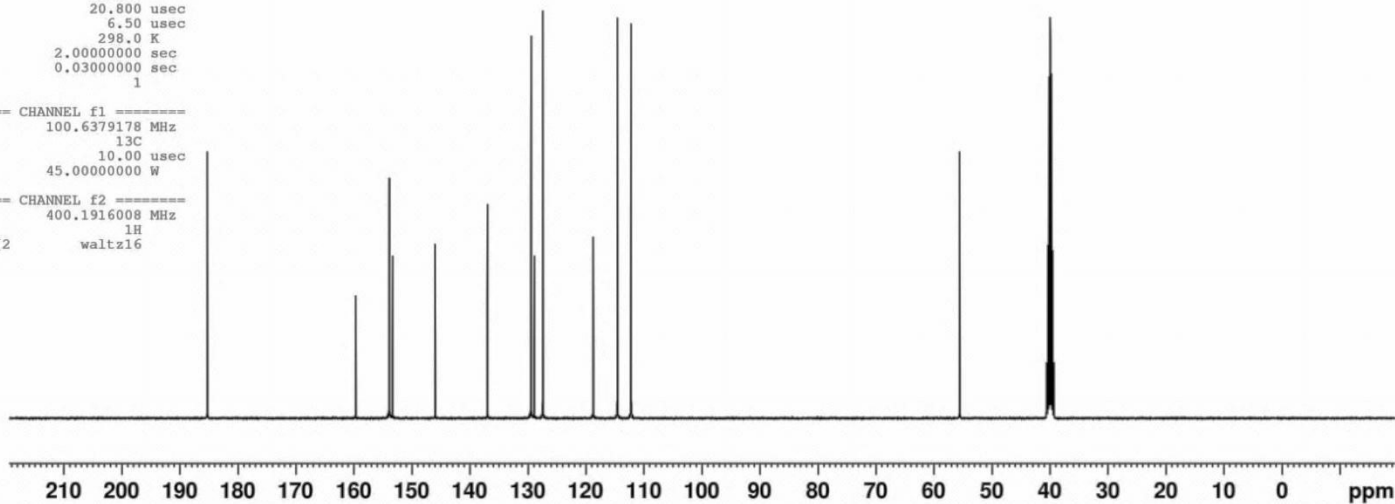

$^{13}\text{C}$ -NMR spectrum (DMSO- $d_6$ ) of compound **19**

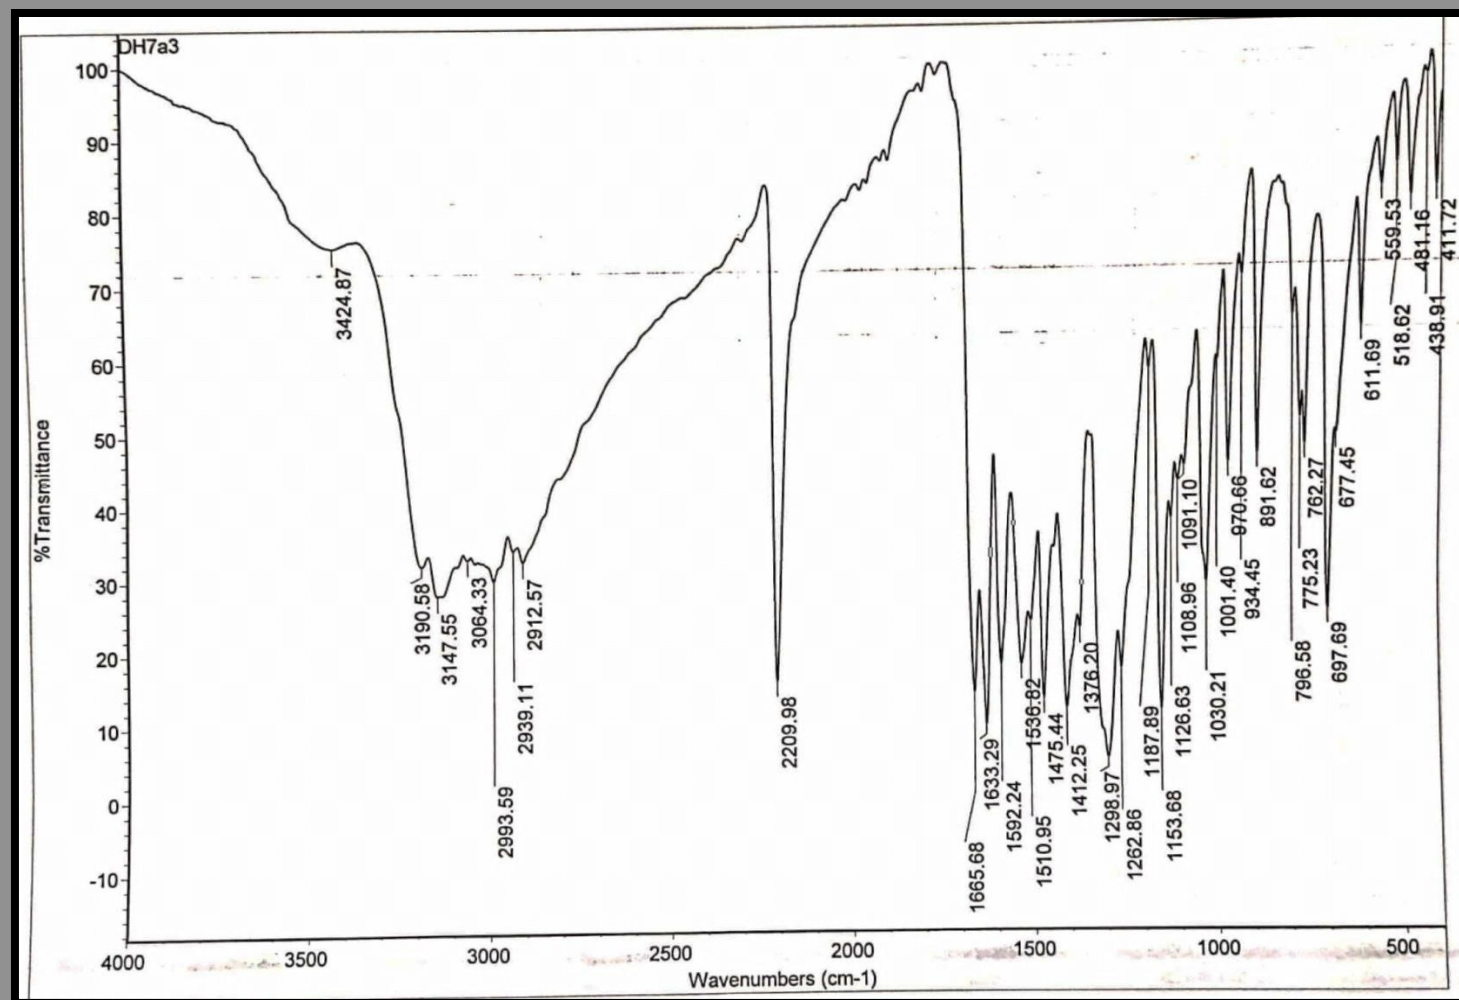

IR spectrum of compound 20

Paula Soliman\_H\_DH7a3

Microanalytical Unit - FOPCU - NMR laboratory  
www.pharma.cu.edu.eg dir-mau.fopcu@pharma.cu.edu.eg

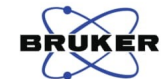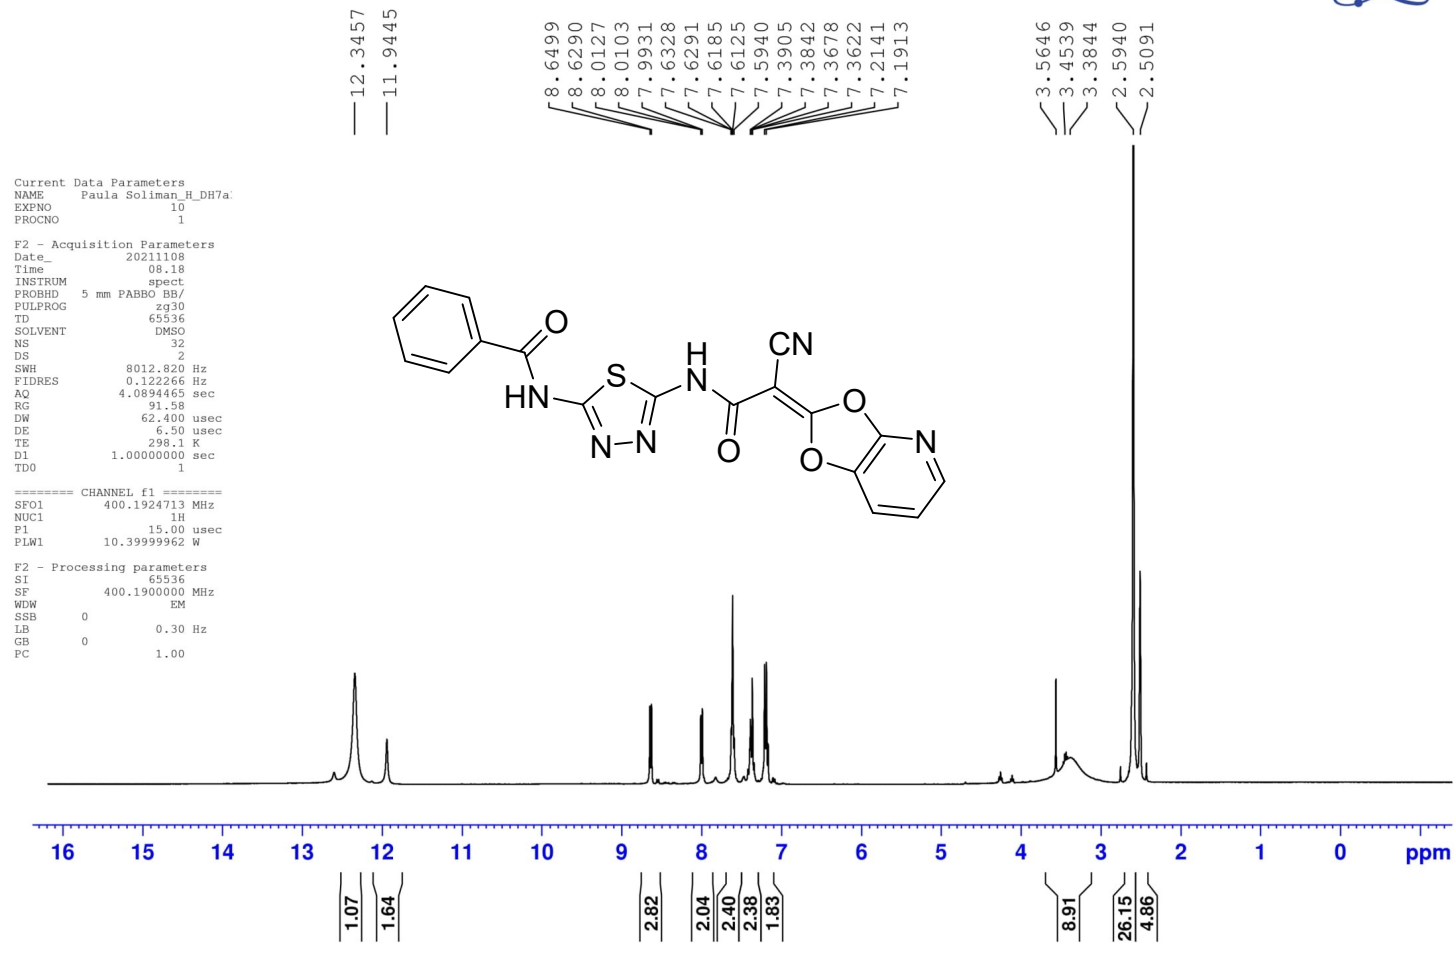

<sup>1</sup>H-NMR spectrum (DMSO-d<sub>6</sub>) of compound 20

Paula Soliman\_H\_DH7a3\_D2O

Microanalytical Unit - FOPCU - NMR laboratory  
www.pharma.cu.edu.eg dir-mau.fopcu@pharma.cu.edu.eg

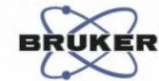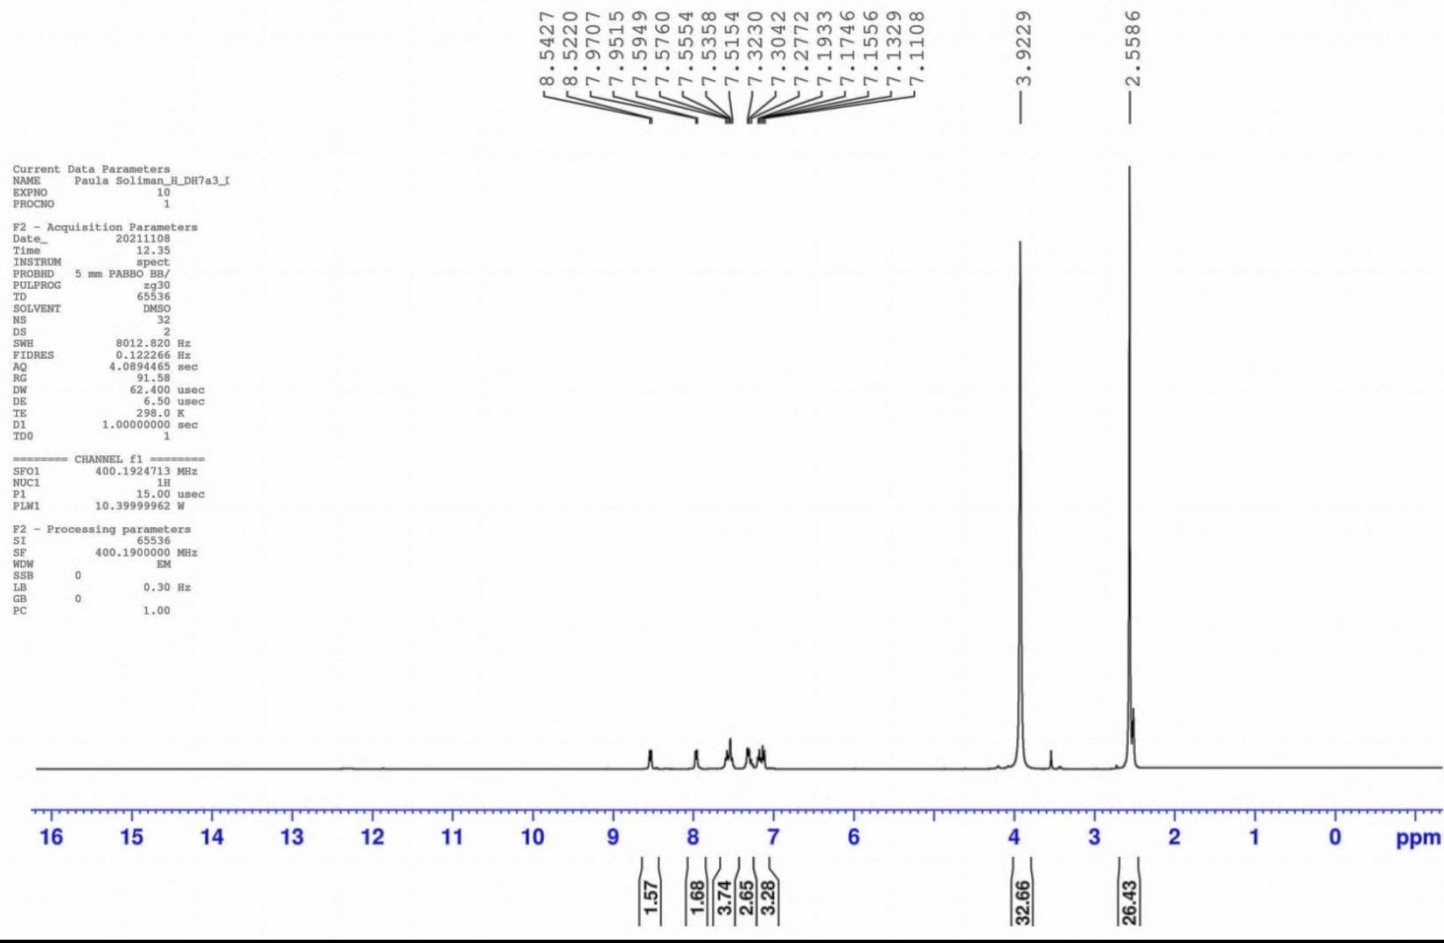

$^1\text{H-NMR}$  spectrum ( $\text{DMSO-d}_6 + \text{D}_2\text{O}$ ) of compound **20**



## Average of Relative viability of cells (%)

| Conc.<br>( $\mu$ M) | HePG-2 |
|---------------------|--------|
| <b>DOX</b>          |        |
| <b>100</b>          | 6.3    |
| <b>50</b>           | 11.2   |
| <b>25</b>           | 14.1   |
| <b>12.5</b>         | 28.3   |
| <b>6.25</b>         | 45.8   |
| <b>3.125</b>        | 57.6   |
| <b>1.56</b>         | 71.2   |
| <b>17</b>           |        |
| <b>100</b>          | 13.7   |
| <b>50</b>           | 22.1   |
| <b>25</b>           | 29.5   |
| <b>12.5</b>         | 45.2   |
| <b>6.25</b>         | 68.0   |
| <b>3.125</b>        | 82.3   |
| <b>1.56</b>         | 98.9   |
| <b>4</b>            |        |
| <b>100</b>          | 36.2   |
| <b>50</b>           | 49.7   |
| <b>25</b>           | 63.1   |
| <b>12.5</b>         | 72.6   |
| <b>6.25</b>         | 88.3   |
| <b>3.125</b>        | 100    |
| <b>1.56</b>         | 100    |
| <b>7d</b>           |        |
| <b>100</b>          | 43.5   |
| <b>50</b>           | 55.0   |

|           |      |
|-----------|------|
| 25        | 68.1 |
| 12.5      | 83.4 |
| 6.25      | 94.2 |
| 3.125     | 100  |
| 1.56      | 100  |
| <b>7g</b> |      |
| 100       | 18.6 |
| 50        | 24.2 |
| 25        | 37.9 |
| 12.5      | 51.4 |
| 6.25      | 70.3 |
| 3.125     | 87.5 |
| 1.56      | 98.4 |
| <b>9</b>  |      |
| 100       | 31.4 |
| 50        | 46.1 |
| 25        | 54.2 |
| 12.5      | 72.8 |
| 6.25      | 89.6 |
| 3.125     | 100  |
| 1.56      | 100  |
| <b>19</b> |      |
| 100       | 23.9 |
| 50        | 31.8 |
| 25        | 43.6 |
| 12.5      | 54.1 |
| 6.25      | 68.4 |
| 3.125     | 87.0 |
| 1.56      | 100  |



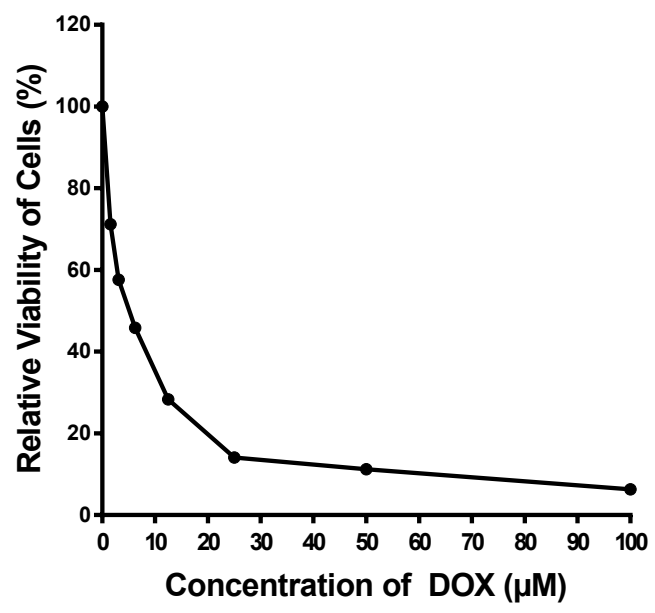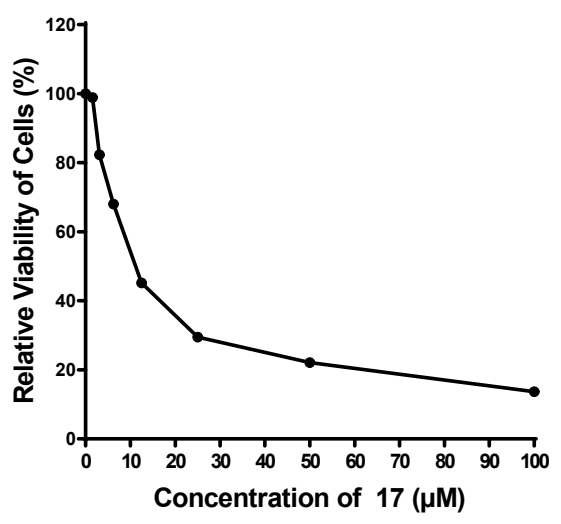

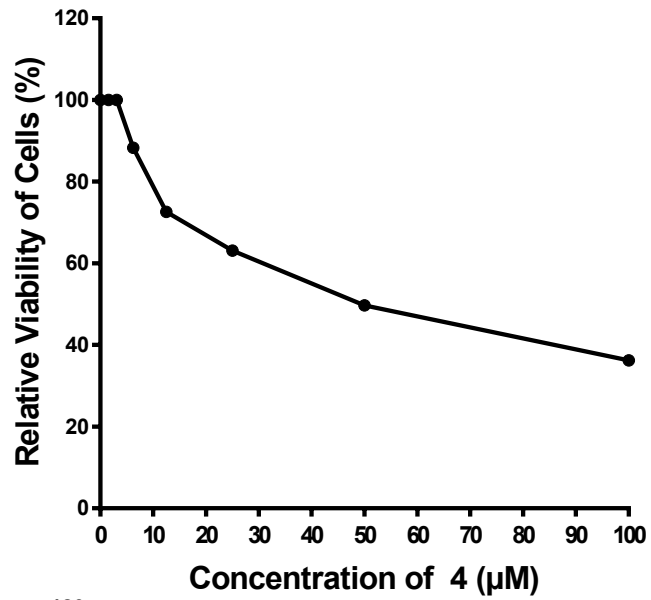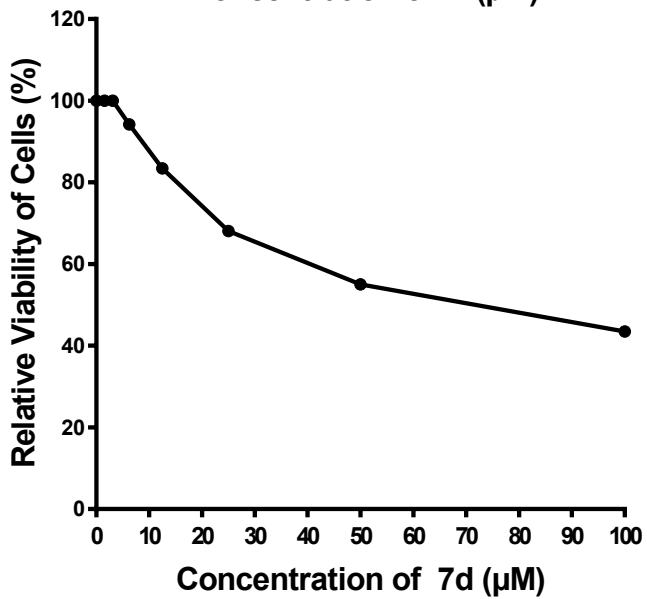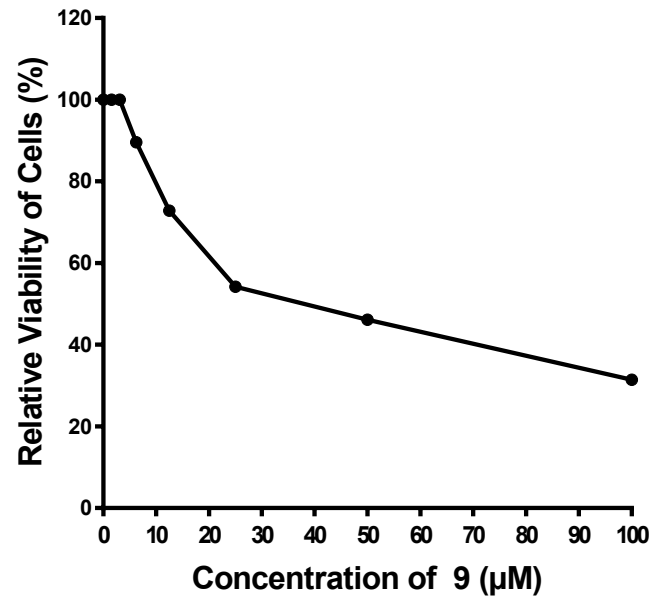

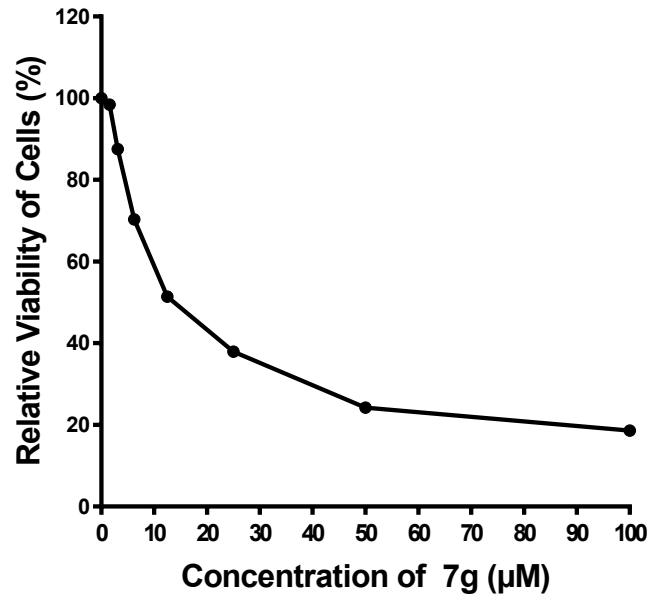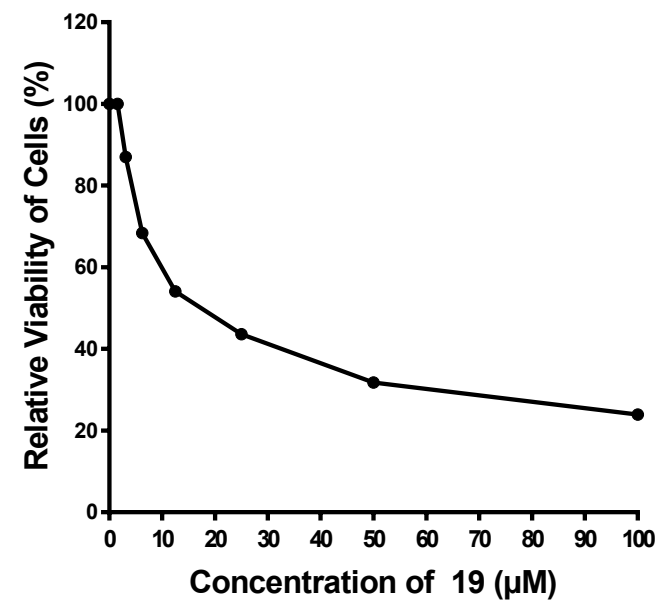

Supplement: d3ra02716c1.pdf [file d3ra02716c1.pdf]
